# Supplementary material
Source: PubMed Central journal article supplement (PMC3339851)
Supplement: suptables.pdf [file suptables.pdf]

## Supplemental Material

### Supplemental Tables

**Supplemental Table I: Distinctly IL-1 $\beta$ -induced genes**

| <b>Accession</b> | <b>Gene</b>                                                      | <b>IL-1<math>\beta</math><br/>Fold<br/>Change</b> | <b>PDGF-DD<br/>Fold<br/>Change</b> |
|------------------|------------------------------------------------------------------|---------------------------------------------------|------------------------------------|
| 1368128_at       | phospholipase A2, group IIA (platelets, synovial fluid), Pla2g2a | 4147.1                                            | -7.6                               |
| 1370964_at       | argininosuccinate synthetase 1, Ass1                             | 651.6                                             | 1.2                                |
| 1387715_at       | Kallmann syndrome 1, Kal1                                        | 408.8                                             | -1.3                               |
| 1368760_at       | chemokine (C-X-C motif) ligand 2, Cxcl2                          | 287.1                                             | 1.1                                |
| 1388032_a_at     | chemokine (C-X-C motif) ligand 3, Cxcl3                          | 280.3                                             | 1.3                                |
| 1370634_x_at     | chemokine (C-X-C motif) ligand 3, Cxcl3                          | 257.1                                             | 1.3                                |
| 1367939_at       | retinol binding protein 1, cellular, Rbp1                        | 250.3                                             | -1.3                               |
| 1368731_at       | orosomucoid 1, Orm1                                              | 248.4                                             | -17.2                              |
| 1369191_at       | interleukin 6, Il6                                               | 229.6                                             | -1.3                               |
| 1387667_at       | nitric oxide synthase 2, inducible, Nos2                         | 215.3                                             | 7.7                                |
| 1371228_at       | colony stimulating factor 2 (granulocyte-macrophage), Csf2       | 214.6                                             | -5.5                               |
| 1387648_at       | chemokine (C-X-C motif) ligand 5, Cxcl5                          | 186.5                                             | -1.7                               |
| 1368174_at       | EGL nine homolog 3 (C. elegans), EglN3                           | 175.0                                             | 1.8                                |
| 1382181_at       | similar to RIKEN cDNA A530088107 gene, LOC311984                 | 165.5                                             | -1.4                               |
| 1374594_at       | similar to RIKEN cDNA 1600029D21, LOC363060                      | 159.4                                             | 1.6                                |
| 1369529_at       | colony stimulating factor 3 (granulocyte), Csf3                  | 134.9                                             | -2.6                               |
| 1393974_at       | mesenchyme homeobox 1 (predicted), Meox1_predicted               | 134.2                                             | -5.3                               |
| 1370633_at       | chemokine (C-X-C motif) ligand 3, Cxcl3                          | 121.3                                             | 1.2                                |
| 1397729_x_at     | similar to RIKEN cDNA 1600029D21, LOC363060                      | 116.7                                             | -2.2                               |
| 1369983_at       | chemokine (C-C motif) ligand 5, Ccl5                             | 104.5                                             | -1.8                               |
| 1369703_at       | endothelial PAS domain protein 1, Epas1                          | 89.9                                              | -1.1                               |
| 1369393_at       | mitogen-activated protein kinase kinase kinase 8, Map3k8         | 88.0                                              | -3.0                               |
| 1388204_at       | matrix metalloproteinase 13, Mmp13                               | 87.8                                              | -2.0                               |
| 1398482_at       | B-cell leukemia/lymphoma 3, Bcl3                                 | 79.0                                              | -1.4                               |
| 1371732_at       | dermatopontin (predicted), Dpt_predicted                         | 74.0                                              | 1.6                                |
| 1392647_at       | similar to Serum amyloid A-3 protein precursor, LOC687992        | 72.9                                              | -1.7                               |
| 1391946_at       | selectin, platelet, Selp                                         | 72.8                                              | -2.3                               |
| 1398333_at       | Transcribed locus, ---                                           | 69.4                                              | -2.4                               |

|              |                                                                                                                 |      |       |
|--------------|-----------------------------------------------------------------------------------------------------------------|------|-------|
| 1368014_at   | prostaglandin E synthase, Ptges                                                                                 | 67.2 | -4.6  |
| 1370367_at   | solute carrier family 1 (neuronal/epithelial high affinity glutamate transporter, system Xag), member 1, Slc1a1 | 66.2 | -1.9  |
| 1392171_at   | chitinase 3-like 1, Chi3l1                                                                                      | 64.8 | -3.7  |
| 1370051_at   | transglutaminase 1, K polypeptide, Tgm1                                                                         | 63.1 | -1.9  |
| 1386739_at   | ets variant gene 4 (E1A enhancer binding protein, E1AF) (predicted), Etv4_predicted                             | 61.8 | 2.9   |
| 1369814_at   | chemokine (C-C motif) ligand 20, Ccl20                                                                          | 58.9 | -20.3 |
| 1368271_a_at | fatty acid binding protein 4, adipocyte, Fabp4                                                                  | 56.7 | 2.5   |
| 1393260_at   | WDNM1 homolog, LOC360228                                                                                        | 56.5 | -1.4  |
| 1368657_at   | matrix metalloproteinase 3, Mmp3                                                                                | 55.8 | -2.0  |
| 1368342_at   | adenosine monophosphate deaminase 3, Ampd3                                                                      | 52.5 | -1.7  |
| 1383469_at   | Transcribed locus, ---                                                                                          | 51.9 | 1.6   |
| 1389420_at   | signal transducing adaptor family member 2, Stap2                                                               | 49.6 | -2.8  |
| 1389470_at   | complement component 2                                                                                          | 49.5 | -8.6  |
| 1369764_at   | complement component 4 binding protein, alpha, C4bpa                                                            | 48.4 | -5.2  |
| 1370154_at   | lysozyme, Lyz                                                                                                   | 47.4 | -3.9  |
| 1377640_at   | Transcribed locus, ---                                                                                          | 44.4 | 1.7   |
| 1374989_at   | ankyrin repeat and SOCS box-containing protein 12, Asb12                                                        | 39.0 | -11.2 |
| 1373947_at   | dermatopontin (predicted), Dpt_predicted                                                                        | 38.8 | 1.4   |
| 1392578_at   | Transcribed locus, ---                                                                                          | 38.1 | -1.3  |
| 1374452_at   | phosphodiesterase 9A, Pde9a                                                                                     | 34.8 | 3.2   |
| 1367679_at   | CD74 antigen (invariant polypeptide of major histocompatibility complex, class II antigen-associated), Cd74     | 32.5 | -6.1  |
| 1370822_at   | RT1 class II, locus Ba, RT1-Ba                                                                                  | 31.9 | -4.7  |
| 1379526_at   | Transcribed locus, ---                                                                                          | 30.6 | -7.9  |
| 1367612_at   | microsomal glutathione S-transferase 1, Mgst1                                                                   | 29.4 | 1.3   |
| 1371033_at   | transporter 1, ATP-binding cassette, sub-family B (MDR/TAP)                                                     | 28.4 | -4.4  |
| 1382613_at   | Transcribed locus, ---                                                                                          | 27.6 | 3.5   |
| 1368626_at   | potassium intermediate/small conductance calcium-activated channel, subfamily N, member 3, Kcnn3                | 27.5 | -1.5  |
| 1372254_at   | serine (or cysteine) peptidase inhibitor, clade G, member 1, Serping1                                           | 27.5 | -7.5  |
| 1368535_at   | harakiri, BCL2 interacting protein (contains only BH3 domain), Hrk                                              | 26.3 | -11.6 |
| 1383863_at   | LIM domain only 2, Lmo2                                                                                         | 26.3 | 2.7   |
| 1368641_at   | wingless-related MMTV integration site 4, Wnt4                                                                  | 24.3 | -4.6  |

|              |                                                                       |      |      |
|--------------|-----------------------------------------------------------------------|------|------|
| 1368473_at   | gap junction membrane channel protein alpha 5, Gja5                   | 22.2 | 1.8  |
| 1368420_at   | ceruloplasmin, Cp                                                     | 21.6 | 1.0  |
| 1368536_at   | ectonucleotide pyrophosphatase/phosphodiesterase 2, Enpp2             | 21.0 | -6.0 |
| 1370883_at   | transporter 1, ATP-binding cassette, sub-family B (MDR/TAP)           | 20.9 | -4.9 |
| 1392280_at   | toll-like receptor 2, Tlr2                                            | 20.8 | -1.4 |
| 1388920_at   | bone morphogenetic protein 6, Bmp6                                    | 20.8 | -7.0 |
| 1370508_a_at | calcium channel, voltage-dependent, T type, alpha 1G subunit, Cacna1g | 20.1 | 2.4  |
| 1393140_at   | zinc finger CCCH type containing 12A (predicted), Zc3h12a_predicted   | 19.9 | -1.5 |
| 1374119_at   | E74-like factor 3, Elf3                                               | 19.8 | -2.4 |
| 1368000_at   | complement component 3, C3                                            | 19.8 | -4.2 |
| 1392946_at   | Transcribed locus, ---                                                | 19.6 | 1.5  |
| 1367701_at   | receptor (calcitonin) activity modifying protein 2, Ramp2             | 19.4 | 1.2  |
| 1367973_at   | chemokine (C-C motif) ligand 2, Ccl2                                  | 19.3 | -1.4 |
| 1382590_at   | similar to 2310015N21Rik protein (predicted)                          | 18.8 | -2.0 |
| 1373881_at   | Rho, GDP dissociation inhibitor (GDI) beta, Arhgdib                   | 18.7 | -1.6 |
| 1387868_at   | lipopolysaccharide binding protein, Lbp                               | 18.7 | -3.8 |
| 1375900_at   | tumor necrosis factor receptor superfamily, member 9, Tnfrsf9         | 18.1 | -2.4 |
| 1390215_at   | ---                                                                   | 18.1 | 1.3  |
| 1367800_at   | plasminogen activator, tissue, Plat                                   | 18.0 | -1.5 |
| 1388033_at   | chemokine (C-X-C motif) ligand 3, Cxcl3                               | 17.4 | -8.0 |
| 1376292_at   | ets homologous factor (predicted), Ehf_predicted                      | 17.2 | 2.3  |
| 1368419_at   | ceruloplasmin, Cp                                                     | 17.0 | -1.3 |
| 1387316_at   | chemokine (C-X-C motif) ligand 1, Cxcl1                               | 16.9 | -1.6 |
| 1393863_at   | CD180 antigen (predicted), Cd180_predicted                            | 16.9 | 1.5  |
| 1369294_at   | bone marrow stromal cell antigen 1, Bst1                              | 16.7 | -1.3 |
| 1385464_at   | Forkhead box Q1, Foxq1                                                | 16.2 | 3.9  |
| 1370383_s_at | transporter 1, ATP-binding cassette, sub-family B (MDR/TAP)           | 15.8 | -4.0 |
| 1395110_at   | Transcribed locus, ---                                                | 15.7 | -4.3 |
| 1370750_a_at | interleukin 1 receptor, type I, Il1r1                                 | 15.3 | 1.3  |
| 1369255_at   | interleukin 1 receptor, type I, Il1r1                                 | 15.3 | 1.0  |
| 1374778_at   | cathepsin C, Ctsc                                                     | 15.2 | 14.5 |
| 1384285_at   | membrane-associated ring finger (C3HC4) 3, March3                     | 14.8 | -1.7 |
| 1382950_at   | Transcribed locus, ---                                                | 14.7 | -1.1 |
| 1389500_at   | CDNA clone IMAGE:7445191, ---                                         | 14.5 | 1.3  |

|              |                                                                                          |      |       |
|--------------|------------------------------------------------------------------------------------------|------|-------|
| 1377029_at   | RAR-related orphan receptor alpha (predicted), Rora_predicted                            | 14.3 | -2.0  |
| 1372064_at   | chemokine (C-X-C motif) ligand 16, Cxcl16                                                | 14.3 | -1.1  |
| 1372518_at   | Fibulin 1 (predicted), Fbln1_predicted                                                   | 14.3 | -1.9  |
| 1370516_at   | solute carrier family 15, member 3, Slc15a3                                              | 14.2 | -6.1  |
| 1370382_at   | RT1 class II, locus Db1, RT1-Db1                                                         | 14.1 | -11.8 |
| 1380336_at   | interleukin-1 receptor-associated kinase 3 (predicted), Irak3_predicted                  | 13.5 | -1.5  |
| 1382433_at   | Transcribed locus, ---                                                                   | 13.3 | -1.5  |
| 1376128_at   | Transcribed locus, ---                                                                   | 13.3 | -2.3  |
| 1395887_at   | similar to RIKEN cDNA 1600029D21, LOC363060                                              | 13.3 | -2.7  |
| 1370173_at   | superoxide dismutase 2, mitochondrial, Sod2                                              | 13.1 | -2.7  |
| 1372440_at   | serine (or cysteine) peptidase inhibitor, clade E, member 2, Serpine2                    | 13.0 | 1.9   |
| 1379935_at   | chemokine (C-C motif) ligand 7, Ccl7                                                     | 12.7 | -2.2  |
| 1369973_at   | xanthine dehydrogenase, Xdh                                                              | 12.5 | -3.0  |
| 1368200_at   | chemokine (C-X3-C motif) ligand 1, Cx3cl1                                                | 12.2 | 1.0   |
| 1391593_at   | Ras association (RalGDS/AF-6) domain family 4, Rassf4                                    | 12.2 | -2.8  |
| 1374284_at   | Ras association (RalGDS/AF-6) domain family 4, Rassf4                                    | 12.2 | -2.4  |
| 1368187_at   | glycoprotein (transmembrane) nmb, Gpnmb                                                  | 11.8 | -1.1  |
| 1372055_at   | similar to P-Rex1 (predicted), RGD1306534_predicted                                      | 11.8 | -1.4  |
| 1388265_x_at | versican, Vcan                                                                           | 11.3 | 1.9   |
| 1391106_at   | Transcribed locus, ---                                                                   | 11.3 | -1.3  |
| 1379564_at   | similar to cajalin 2 isoform a (predicted), RGD1565556_predicted                         | 11.2 | -2.4  |
| 1382685_at   | slit homolog 2 (Drosophila), Slit2                                                       | 11.1 | 1.6   |
| 1394475_at   | Transcribed locus, ---                                                                   | 11.1 | -3.2  |
| 1388201_at   | bone morphogenetic protein 6, Bmp6                                                       | 11.0 | -9.2  |
| 1368418_a_at | ceruloplasmin, Cp                                                                        | 11.0 | -1.4  |
| 1378827_at   | bone morphogenetic protein 6, Bmp6                                                       | 10.8 | 1.9   |
| 1385751_at   | thrombospondin 2, Thbs2                                                                  | 10.8 | -15.9 |
| 1385557_at   | ---                                                                                      | 10.8 | 1.4   |
| 1367905_at   | ectonucleotide pyrophosphatase/phosphodiesterase 3, Enpp3                                | 10.8 | 2.1   |
| 1391453_at   | Epstein-Barr virus induced gene 3 (similar to Interleukin-27 beta chain precursor), Ebi3 | 10.7 | 1.5   |
| 1370033_at   | myosin, light polypeptide 1, Myl1                                                        | 10.7 | -5.7  |
| 1388146_at   | Brain Ntab mRNA sequence, ---                                                            | 10.6 | -1.0  |
| 1370113_at   | baculoviral IAP repeat-containing 3, Birc3                                               | 10.6 | -2.8  |
| 1368940_at   | purinergic receptor P2Y, G-protein coupled 2,                                            | 10.5 | 1.1   |

|              |                                                                                                                              |      |       |
|--------------|------------------------------------------------------------------------------------------------------------------------------|------|-------|
|              | P2ry2                                                                                                                        |      |       |
| 1380229_at   | Transcribed locus, ---                                                                                                       | 10.3 | 1.3   |
| 1390866_at   | Transcribed locus, ---                                                                                                       | 10.3 | 1.7   |
| 1387951_at   | CD55 antigen, Cd55                                                                                                           | 10.0 | 1.3   |
| 1368693_at   | Gardner-Rasheed feline sarcoma viral (Fgr) oncogene homolog, Fgr                                                             | 10.0 | -3.2  |
| 1368209_at   | PDZK1 interacting protein 1, Pdzk1ip1                                                                                        | 9.9  | -8.5  |
| 1379022_at   | a disintegrin-like and metallopeptidase (reprolysin type) with thrombospondin type 1 motif, 8 (predicted), Adamts8_predicted | 9.7  | 2.1   |
| 1378321_at   | Ras association (RalGDS/AF-6) domain family 4, Rassf4                                                                        | 9.7  | -2.2  |
| 1369584_at   | suppressor of cytokine signaling 3, Socs3                                                                                    | 9.6  | 1.0   |
| 1388773_at   | tumor necrosis factor, alpha-induced protein 2, Tnfaip2                                                                      | 9.5  | 1.2   |
| 1371237_a_at | metallothionein 1a, Mt1a                                                                                                     | 9.4  | -1.9  |
| 1370406_a_at | CD55 antigen, Cd55                                                                                                           | 9.3  | -1.3  |
| 1381533_at   | Rho family GTPase 1, Rnd1                                                                                                    | 9.2  | -2.7  |
| 1393252_at   | Transcribed locus, ---                                                                                                       | 9.1  | -4.3  |
| 1388720_at   | Transcribed locus, ---                                                                                                       | 9.1  | -1.7  |
| 1387011_at   | lipocalin 2, Lcn2                                                                                                            | 9.1  | -2.1  |
| 1367877_at   | solute carrier family 11 (proton-coupled divalent metal ion transporters), member 2, Slc11a2                                 | 9.0  | -1.3  |
| 1387053_at   | flavin containing monooxygenase 1, Fmo1                                                                                      | 9.0  | -2.4  |
| 1379183_at   | WD repeat domain 62, Wdr62                                                                                                   | 8.9  | 1.2   |
| 1388745_at   | sema domain, immunoglobulin domain (Ig), transmembrane domain (TM) and short cytoplasmic domain, (semaphorin) 4A, Sema4a     | 8.9  | -1.1  |
| 1370148_at   | haptoglobin, Hp                                                                                                              | 8.8  | -7.4  |
| 1368266_at   | arginase 1, liver, Arg1                                                                                                      | 8.7  | -1.9  |
| 1396472_at   | Transcribed locus, ---                                                                                                       | 8.5  | -11.2 |
| 1389662_at   | WNK lysine deficient protein kinase 4, Wnk4                                                                                  | 8.3  | 1.7   |
| 1384816_at   | coxsackie virus and adenovirus receptor, Cxadr                                                                               | 8.3  | 1.5   |
| 1369683_at   | BH3 interacting domain death agonist, Bid                                                                                    | 8.3  | 1.1   |
| 1385380_at   | Transcribed locus, ---                                                                                                       | 8.2  | -1.2  |
| 1376897_at   | similar to Hypothetical protein 4832420M10 (predicted), RGD1560022_predicted                                                 | 8.1  | -4.0  |
| 1383910_at   | Transcribed locus, ---                                                                                                       | 7.9  | 1.9   |
| 1372027_at   | Transcribed locus, ---                                                                                                       | 7.9  | -2.8  |
| 1387221_at   | GTP cyclohydrolase 1, Gch1                                                                                                   | 7.8  | -2.0  |
| 1382941_at   | Transcribed locus, moderately similar to NP_808250.1 MLX interacting protein isoform 1 [Mus musculus], ---                   | 7.8  | -1.6  |
| 1368813_at   | CCAAT/enhancer binding protein (C/EBP), delta,                                                                               | 7.6  | -1.5  |

|              |                                                                                          |     |      |
|--------------|------------------------------------------------------------------------------------------|-----|------|
|              | Cebpd                                                                                    |     |      |
| 1373207_at   | Transcribed locus, ---                                                                   | 7.5 | 1.9  |
| 1389464_at   | ligand of numb-protein X 1 (predicted),<br>Lnx1_predicted                                | 7.5 | -4.8 |
| 1379381_at   | Transcribed locus, ---                                                                   | 7.5 | -1.6 |
| 1370583_s_at | ATP-binding cassette, sub-family B (MDR/TAP),<br>member 1B                               | 7.4 | -1.6 |
| 1373037_at   | ubiquitin-conjugating enzyme E2L 6, Ube2l6                                               | 7.4 | -1.0 |
| 1377092_at   | Transcribed locus, ---                                                                   | 7.3 | 1.3  |
| 1374575_at   | cAMP responsive element binding protein 3-like<br>1, Creb3l1                             | 7.3 | -2.3 |
| 1367755_at   | cysteine dioxygenase 1, cytosolic, Cdo1                                                  | 7.3 | -4.2 |
| 1386976_at   | CD82 antigen, Cd82                                                                       | 7.2 | 1.7  |
| 1387343_at   | CCAAT/enhancer binding protein (C/EBP), delta,<br>Cebpd                                  | 7.1 | -1.7 |
| 1384289_at   | RELT-like 2, Rel2                                                                        | 7.1 | -1.7 |
| 1379059_at   | MICAL-like 2, Micall2                                                                    | 7.1 | -1.2 |
| 1388004_at   | G protein-coupled receptor 37-like 1, Gpr37l1                                            | 7.0 | -3.9 |
| 1388924_at   | angiopoietin-like 4, Angptl4                                                             | 7.0 | -4.6 |
| 1382311_at   | Traf2 binding protein, T2bp                                                              | 7.0 | -2.2 |
| 1367784_a_at | clusterin, Clu                                                                           | 6.9 | -1.1 |
| 1391255_at   | zinc finger, MYND domain containing 15<br>(predicted), Zmynd15_predicted                 | 6.9 | -1.3 |
| 1376617_at   | Transcribed locus, ---                                                                   | 6.8 | -4.2 |
| 1391428_at   | Transcribed locus, ---                                                                   | 6.8 | 3.4  |
| 1396613_at   | Transcribed locus, ---                                                                   | 6.8 | -3.0 |
| 1368550_at   | forkhead box Q1, Foxq1                                                                   | 6.7 | 1.7  |
| 1368480_at   | CDW92 antigen, Cdw92                                                                     | 6.7 | -1.0 |
| 1374246_at   | Transcribed locus, ---                                                                   | 6.7 | -3.1 |
| 1370172_at   | superoxide dismutase 2, mitochondrial, Sod2                                              | 6.7 | -2.0 |
| 1389538_at   | nuclear factor of kappa light chain gene<br>enhancer in B-cells inhibitor, alpha, Nfkbia | 6.7 | -1.7 |
| 1391925_at   | chemokine (C-C motif) ligand 19 (predicted),<br>Ccl19_predicted                          | 6.7 | -4.0 |
| 1394597_at   | DDHD domain containing 1, Ddhd1                                                          | 6.6 | -1.4 |
| 1387395_at   | adenosine A2B receptor, Adora2b                                                          | 6.6 | -1.1 |
| 1389214_at   | laminin, alpha 4, Lama4                                                                  | 6.6 | -6.8 |
| 1386191_a_at | lipoma HMGIC fusion partner-like 2 (predicted),<br>Lhfpl2_predicted                      | 6.5 | 25.5 |
| 1374474_at   | copine VIII (predicted), Cpne8_predicted                                                 | 6.5 | -1.2 |
| 1374106_at   | ---                                                                                      | 6.4 | -2.2 |
| 1383605_at   | similar to alpha-fetoprotein                                                             | 6.4 | 1.3  |
| 1368947_at   | growth arrest and DNA-damage-inducible 45<br>alpha, Gadd45a                              | 6.4 | 1.0  |

|              |                                                                                                                  |     |      |
|--------------|------------------------------------------------------------------------------------------------------------------|-----|------|
| 1379371_at   | Transcribed locus, ---                                                                                           | 6.4 | -2.1 |
| 1378032_at   | nuclear factor of kappa light polypeptide gene enhancer in B-cells inhibitor, zeta (predicted), Nfkbiz_predicted | 6.3 | -1.0 |
| 1391046_at   | SET and MYND domain containing 3, Smyd3                                                                          | 6.3 | -1.2 |
| 1370362_at   | protein tyrosine phosphatase, receptor type, N, Ptpn                                                             | 6.3 | 1.6  |
| 1379313_at   | ---                                                                                                              | 6.2 | 1.7  |
| 1370445_at   | phospholipase A1 member A, Pla1a                                                                                 | 6.1 | -1.6 |
| 1378927_at   | ---                                                                                                              | 6.1 | -3.3 |
| 1392107_at   | strawberry notch homolog 2 (Drosophila), Sbno2                                                                   | 6.1 | -1.3 |
| 1373054_at   | CDW92 antigen, Cdw92                                                                                             | 6.1 | -1.0 |
| 1374061_at   | CD302 antigen, Cd302                                                                                             | 6.1 | -2.9 |
| 1381376_at   | Similar to Tumor necrosis factor, alpha-induced protein 2 (Primary response gene B94 protein), LOC299339         | 6.1 | 1.3  |
| 1390529_at   | CD83 antigen (predicted), Cd83_predicted                                                                         | 6.1 | -3.3 |
| 1390896_at   | Transcribed locus, ---                                                                                           | 6.1 | -2.9 |
| 1368474_at   | vascular cell adhesion molecule 1, Vcam1                                                                         | 6.1 | -6.4 |
| 1373546_at   | putative UA20 protein, Ua20                                                                                      | 6.0 | 1.1  |
| 1369685_at   | twist homolog 2 (Drosophila), Twist2                                                                             | 5.9 | 1.6  |
| 1383489_at   | Transcribed locus, ---                                                                                           | 5.9 | -1.1 |
| 1376013_at   | tetratricopeptide repeat domain 9, Ttc9                                                                          | 5.8 | 1.1  |
| 1378179_a_at | lipoma HMGIC fusion partner-like 2 (predicted), Lhfpl2_predicted                                                 | 5.8 | 1.7  |
| 1393003_at   | Transcribed locus, ---                                                                                           | 5.6 | -1.2 |
| 1387932_at   | solute carrier family 1 (neuronal/epithelial high affinity glutamate transporter, system Xag), member 1, Slc1a1  | 5.6 | 1.8  |
| 1386981_at   | solute carrier family 16 (monocarboxylic acid transporters), member 1, Slc16a1                                   | 5.6 | 1.3  |
| 1370260_at   | adducin 3 (gamma), Add3                                                                                          | 5.6 | -1.1 |
| 1390585_at   | mannan-binding lectin serine peptidase 1, Masp1                                                                  | 5.5 | -1.7 |
| 1370638_at   | ankyrin 3, epithelial, Ank3                                                                                      | 5.4 | -1.4 |
| 1372560_at   | Transcribed locus, ---                                                                                           | 5.4 | -1.2 |
| 1373027_at   | ---                                                                                                              | 5.4 | 1.1  |
| 1383786_at   | RAB32, member RAS oncogene family, Rab32                                                                         | 5.4 | 1.3  |
| 1388036_a_at | myeloid/lymphoid or mixed-lineage leukemia (trithorax homolog, Drosophila); translocated to, 4, Mllt4            | 5.4 | -1.1 |
| 1374429_at   | Transcribed locus, ---                                                                                           | 5.3 | 1.4  |
| 1383906_at   | lung-inducible neuralized-related C3HC4 RING domain protein, LincR                                               | 5.3 | 1.1  |

|              |                                                                                              |     |      |
|--------------|----------------------------------------------------------------------------------------------|-----|------|
| 1379770_at   | choline phosphotransferase 1, Chpt1                                                          | 5.3 | -1.1 |
| 1382269_at   | cyclin M2, Cnm2                                                                              | 5.3 | -2.1 |
| 1387311_at   | NADPH oxidase 1, Nox1                                                                        | 5.3 | 1.6  |
| 1389410_s_at | ---                                                                                          | 5.2 | 1.0  |
| 1382381_at   | Transcribed locus, ---                                                                       | 5.2 | 1.6  |
| 1378003_at   | leucine rich repeat containing 8 family, member B, Lrrc8b                                    | 5.2 | 1.4  |
| 1383119_at   | opioid growth factor receptor-like 1, Ogfr1                                                  | 5.2 | 1.1  |
| 1373140_at   | Transcribed locus, ---                                                                       | 5.2 | -1.2 |
| 1377759_at   | BH3 interacting domain death agonist, Bid                                                    | 5.1 | 1.3  |
| 1385950_at   | family with sequence similarity 131, member B, Fam131b                                       | 5.1 | 1.8  |
| 1399096_at   | Transcribed locus, ---                                                                       | 5.1 | -1.1 |
| 1388059_a_at | solute carrier family 11 (proton-coupled divalent metal ion transporters), member 2, Slc11a2 | 5.0 | -1.1 |
| 1373233_at   | lipoma HMGIC fusion partner-like 2 (predicted), Lhfpl2_predicted                             | 5.0 | 1.4  |
| 1393887_at   | choline phosphotransferase 1, Chpt1                                                          | 5.0 | 1.0  |
| 1370957_at   | interleukin 6 signal transducer, Il6st                                                       | 5.0 | 1.3  |
| 1382069_at   | Putative UA20 protein, Ua20                                                                  | 4.9 | 1.0  |
| 1377650_at   | Transcribed locus, ---                                                                       | 4.9 | 1.1  |
| 1385497_x_at | ligand of numb-protein X 1 (predicted), Lnx1_predicted                                       | 4.9 | -2.2 |
| 1379631_at   | colony stimulating factor 1 (macrophage), Csf1                                               | 4.8 | 1.2  |
| 1378130_at   | ring finger protein, transmembrane 2, Rnft2                                                  | 4.8 | -1.4 |
| 1373666_at   | Rap guanine nucleotide exchange factor (GEF) 5, Rapgef5                                      | 4.8 | -1.2 |
| 1385426_at   | coiled-coil domain containing 109B, Ccdc109b                                                 | 4.7 | 1.3  |
| 1395881_at   | Death-associated protein, Dap                                                                | 4.6 | 1.2  |
| 1388271_at   | metallothionein 2A, Mt2A                                                                     | 4.6 | -1.3 |
| 1372403_at   | similar to Nuclear membrane binding protein NUCLING (predicted), RGD1560011_predicted        | 4.6 | 1.3  |
| 1369029_at   | phospholipid scramblase 1, Plscr1                                                            | 4.6 | 2.0  |
| 1370941_at   | platelet derived growth factor receptor, alpha polypeptide, Pdgfra                           | 4.6 | -1.5 |
| 1367568_a_at | matrix Gla protein, Mgp                                                                      | 4.6 | -1.4 |
| 1376750_at   | Transcribed locus, ---                                                                       | 4.5 | -4.5 |
| 1370728_at   | interleukin 13 receptor, alpha 1, Il13ra1                                                    | 4.5 | -1.1 |
| 1370882_at   | major histocompatibility complex, class II, DM beta, Hla-dmb                                 | 4.5 | -2.1 |
| 1384971_at   | DEP domain containing 7, Depdc7                                                              | 4.5 | 2.6  |
| 1373043_at   | stromal cell-derived factor 2-like 1 (predicted), Sdf2l1_predicted                           | 4.5 | 1.1  |
| 1374265_at   | Transcribed locus, ---                                                                       | 4.5 | 1.2  |



|              |                                                                                                       |     |      |
|--------------|-------------------------------------------------------------------------------------------------------|-----|------|
| 1372293_at   | Similar to RIKEN cDNA 1110038F21 (predicted), RGD1562059_predicted                                    | 4.4 | 1.1  |
| 1373984_at   | solute carrier family 39 (zinc transporter), member 14 (predicted), Slc39a14_predicted                | 4.4 | -1.7 |
| 1376661_at   | similar to CG11206-PA, LOC313672                                                                      | 4.4 | -2.3 |
| 1371974_at   | phytanoyl-CoA dioxygenase domain containing 1, Phyhd1                                                 | 4.4 | -1.2 |
| 1391269_at   | ---                                                                                                   | 4.4 | 1.1  |
| 1370963_at   | growth arrest specific 7, Gas7                                                                        | 4.4 | 2.0  |
| 1376785_at   | Transcribed locus, ---                                                                                | 4.4 | 1.2  |
| 1368754_at   | pyrimidinergic receptor P2Y, G-protein coupled, 6, P2ry6                                              | 4.4 | -2.1 |
| 1373882_at   | c-fos induced growth factor, Figf                                                                     | 4.4 | -3.9 |
| 1378126_at   | DENN/MADD domain containing 2A, Dennd2a                                                               | 4.3 | 1.6  |
| 1377214_a_at | hypothetical protein LOC292764, RGD1303117                                                            | 4.3 | 1.5  |
| 1387087_at   | CCAAT/enhancer binding protein (C/EBP), beta, Cebpb                                                   | 4.3 | -1.9 |
| 1387599_a_at | NAD(P)H dehydrogenase, quinone 1, Nqo1                                                                | 4.3 | 1.2  |
| 1376891_at   | Transcribed locus, ---                                                                                | 4.3 | 1.1  |
| 1388662_at   | Transcribed locus, ---                                                                                | 4.3 | -3.6 |
| 1375028_at   | Transcribed locus, ---                                                                                | 4.3 | -1.2 |
| 1387392_at   | myeloid/lymphoid or mixed-lineage leukemia (trithorax homolog, Drosophila); translocated to, 4, Mllt4 | 4.2 | 1.3  |
| 1372213_at   | similar to hypothetical protein MGC6835, LOC500300                                                    | 4.2 | -1.1 |
| 1367814_at   | ATPase, Na <sup>+</sup> /K <sup>+</sup> transporting, beta 1 polypeptide, Atp1b1                      | 4.2 | 1.1  |
| 1392832_at   | similar to angiopoietin-like 1, LOC684489                                                             | 4.2 | -1.3 |
| 1393730_at   | Transcribed locus, ---                                                                                | 4.1 | 1.2  |
| 1376198_at   | adipocyte-specific adhesion molecule, Asam                                                            | 4.1 | -2.2 |
| 1380696_at   | Transcribed locus, ---                                                                                | 4.1 | -1.2 |
| 1368990_at   | cytochrome P450, family 1, subfamily b, polypeptide 1, Cyp1b1                                         | 4.1 | -1.1 |
| 1370301_at   | matrix metalloproteinase 2, Mmp2                                                                      | 4.1 | -1.2 |
| 1370904_at   | major histocompatibility complex, class II, DM alpha, Hla-dma                                         | 4.1 | -1.1 |
| 1390292_at   | transmembrane protein 8 (five membrane-spanning domains) (predicted), Tmem8_predicted                 | 4.1 | 1.3  |
| 1384099_at   | solute carrier family 39 (metal ion transporter), member 6, Slc39a6                                   | 4.0 | -1.1 |
| 1395374_at   | Transcribed locus, ---                                                                                | 4.0 | -3.7 |
| 1370843_at   | guanine nucleotide binding protein (G protein), gamma 8, Gng8                                         | 4.0 | -1.1 |

|              |                                                                                                                              |     |      |
|--------------|------------------------------------------------------------------------------------------------------------------------------|-----|------|
| 1388848_at   | similar to hypothetical protein MGC13251, RGD1308350                                                                         | 4.0 | 1.7  |
| 1368605_at   | SH2B adaptor protein 2, Sh2b2                                                                                                | 4.0 | -1.2 |
| 1388966_at   | Transcribed locus, ---                                                                                                       | 4.0 | 1.3  |
| 1370942_at   | RAS p21 protein activator 3, Rasa3                                                                                           | 4.0 | -1.1 |
| 1368856_at   | Janus kinase 2, Jak2                                                                                                         | 4.0 | -1.2 |
| 1371926_at   | Transcribed locus, ---                                                                                                       | 3.9 | -1.0 |
| 1368679_a_at | Yamaguchi sarcoma viral (v-yes-1) oncogene homolog, Lyn                                                                      | 3.9 | -1.2 |
| 1383229_at   | ATP-binding cassette, sub-family A (ABC1), member 7, Abca7                                                                   | 3.9 | 1.0  |
| 1388753_at   | sulfatase 2, Sulf2                                                                                                           | 3.9 | -1.9 |
| 1368015_at   | prostaglandin E synthase, Ptges                                                                                              | 3.9 | -1.3 |
| 1389082_at   | ---                                                                                                                          | 3.9 | 1.3  |
| 1367712_at   | tissue inhibitor of metalloproteinase 1, Timp1                                                                               | 3.9 | -1.1 |
| 1395307_at   | similar to cajalin 2 isoform a (predicted), RGD1565556_predicted                                                             | 3.8 | -1.2 |
| 1369044_a_at | phosphodiesterase 4B, cAMP specific, Pde4b                                                                                   | 3.8 | -2.1 |
| 1383330_at   | Transcribed locus, ---                                                                                                       | 3.8 | 1.4  |
| 1367881_at   | signal-regulatory protein alpha, Sirpa                                                                                       | 3.8 | -2.1 |
| 1368311_at   | O-6-methylguanine-DNA methyltransferase, Mgmt                                                                                | 3.8 | 1.1  |
| 1380583_s_at | colony stimulating factor 1 (macrophage), Csf1                                                                               | 3.8 | 1.1  |
| 1376768_at   | Transcribed locus, ---                                                                                                       | 3.8 | -1.1 |
| 1369194_a_at | cyclin-dependent kinase inhibitor 2A, Cdkn2a                                                                                 | 3.8 | 1.2  |
| 1384408_at   | Transcribed locus, ---                                                                                                       | 3.8 | 1.1  |
| 1376858_at   | similar to protein 7 transactivated by hepatitis B virus X antigen, LOC686809                                                | 3.7 | 1.7  |
| 1381993_at   | chloride intracellular channel 2, Clic2                                                                                      | 3.7 | -1.4 |
| 1371194_at   | tumor necrosis factor alpha induced protein 6, Tnfaip6                                                                       | 3.7 | 1.3  |
| 1397929_at   | Transcribed locus, ---                                                                                                       | 3.7 | -1.7 |
| 1388711_at   | interleukin 13 receptor, alpha 1, Il13ra1                                                                                    | 3.7 | -1.3 |
| 1379400_at   | Transcribed locus, ---                                                                                                       | 3.7 | 1.0  |
| 1378153_at   | Transcribed locus, ---                                                                                                       | 3.7 | 1.6  |
| 1372434_at   | CASK-interacting protein CIP98, Cip98                                                                                        | 3.7 | -1.2 |
| 1375332_at   | procollagen-proline, 2-oxoglutarate 4-dioxygenase (proline 4-hydroxylase), alpha II polypeptide (predicted), P4ha2_predicted | 3.7 | -2.7 |
| 1384148_at   | RAB20, member RAS oncogene family, Rab20                                                                                     | 3.6 | 1.8  |
| 1393629_at   | H2.0-like homeobox, Hlx                                                                                                      | 3.6 | -2.4 |
| 1368771_at   | sulfatase 1, Sulf1                                                                                                           | 3.6 | -4.1 |
| 1393696_at   | fin bud initiation factor, Fbin                                                                                              | 3.6 | 1.2  |
| 1378484_at   | RAS-like, family 12 (predicted),                                                                                             | 3.6 | -2.9 |

|              |                                                                                                                           |     |      |
|--------------|---------------------------------------------------------------------------------------------------------------------------|-----|------|
|              | Rasl12_predicted                                                                                                          |     |      |
| 1375011_at   | Transcribed locus, ---                                                                                                    | 3.6 | -2.7 |
| 1369716_s_at | lectin, galactose binding, soluble 5                                                                                      | 3.5 | -2.1 |
| 1379483_at   | Basic helix-loop-helix domain containing, class B2, Bhlhb2                                                                | 3.5 | 1.6  |
| 1368519_at   | serine (or cysteine) peptidase inhibitor, clade E, member 1, Serpine1                                                     | 3.5 | -2.1 |
| 1394940_at   | family with sequence similarity 46, member A, Fam46a                                                                      | 3.5 | -1.7 |
| 1374273_at   | Transcribed locus, ---                                                                                                    | 3.5 | -1.0 |
| 1385978_at   | Transcribed locus, ---                                                                                                    | 3.5 | 1.3  |
| 1398905_at   | ATPase, H transporting, lysosomal V1 subunit G1 (predicted), Atp6v1g1_predicted                                           | 3.5 | -1.1 |
| 1374174_at   | Transcribed locus, ---                                                                                                    | 3.5 | -1.1 |
| 1371479_at   | methyltransferase like 7A, Mettl7a                                                                                        | 3.5 | -1.6 |
| 1368448_at   | latent transforming growth factor beta binding protein 2, Ltbp2                                                           | 3.5 | -1.8 |
| 1395279_at   | PX domain containing serine/threonine kinase, Pxx                                                                         | 3.5 | -1.1 |
| 1378334_a_at | Transcribed locus, ---                                                                                                    | 3.5 | -2.3 |
| 1392813_at   | Transcribed locus, strongly similar to NP_035578.3 SRY-box containing gene 9 [Mus musculus], ---                          | 3.4 | 1.9  |
| 1376740_at   | Transcribed locus, ---                                                                                                    | 3.4 | -1.4 |
| 1384076_at   | Transcribed locus, strongly similar to XP_001479207.1 PREDICTED: similar to Cache domain containing 1 [Mus musculus], --- | 3.4 | 1.1  |
| 1377790_at   | Transcribed locus, ---                                                                                                    | 3.4 | 1.6  |
| 1390336_at   | similar to Protein C21orf63 homolog precursor (predicted), RGD1307569_predicted                                           | 3.4 | 1.1  |
| 1387027_a_at | lectin, galactose binding, soluble 9, Lgals9                                                                              | 3.4 | -1.9 |
| 1376889_at   | Transcribed locus, ---                                                                                                    | 3.4 | 1.7  |
| 1368541_at   | embigin, Emb                                                                                                              | 3.4 | -1.0 |
| 1398967_at   | mediator complex subunit 24, Med24                                                                                        | 3.3 | 1.2  |
| 1387843_at   | follistatin, Fst                                                                                                          | 3.3 | -1.2 |
| 1369193_at   | cyclin-dependent kinase inhibitor 2B (p15, inhibits CDK4), Cdkn2b                                                         | 3.3 | 3.0  |
| 1372362_at   | galactokinase 2, Galk2                                                                                                    | 3.3 | -1.0 |
| 1377353_a_at | tumor necrosis factor (ligand) superfamily, member 13, Tnfsf13                                                            | 3.3 | -1.3 |
| 1375339_at   | enthoprotin, Enth                                                                                                         | 3.3 | 1.2  |
| 1388556_at   | syntaxin 6, Stx6                                                                                                          | 3.3 | -1.0 |
| 1368914_at   | runt related transcription factor 1, Runx1                                                                                | 3.3 | 1.3  |
| 1374433_at   | Transcribed locus, ---                                                                                                    | 3.3 | 1.4  |
| 1387788_at   | Jun-B oncogene, Junb                                                                                                      | 3.3 | -1.1 |

|            |                                                                                                  |     |      |
|------------|--------------------------------------------------------------------------------------------------|-----|------|
| 1395442_at | Transcribed locus, ---                                                                           | 3.3 | 1.1  |
| 1379356_at | Transcribed locus, ---                                                                           | 3.3 | -1.2 |
| 1382291_at | Transcribed locus, strongly similar to NP_035578.3 SRY-box containing gene 9 [Mus musculus], --- | 3.2 | 1.1  |
| 1389008_at | Sprouty-related, EVH1 domain containing 2, Spred2                                                | 3.2 | 2.0  |
| 1373863_at | mitogen-activated protein kinase kinase kinase kinase 4 (predicted), Map4k4_predicted            | 3.2 | 1.3  |
| 1368540_at | trophoblast glycoprotein, Tpbg                                                                   | 3.2 | 1.1  |
| 1375874_at | similar to cDNA sequence BC013529 (predicted), RGD1309759_predicted                              | 3.2 | -2.7 |
| 1377916_at | schlafen 2 (predicted), Slfn2_predicted                                                          | 3.2 | 1.8  |
| 1391643_at | ---                                                                                              | 3.2 | 1.6  |
| 1382944_at | Transcribed locus, ---                                                                           | 3.2 | -1.2 |
| 1370935_at | CDW92 antigen, Cdw92                                                                             | 3.1 | -1.4 |
| 1384449_at | Transcribed locus, ---                                                                           | 3.1 | 1.5  |
| 1392720_at | cytochrome P450, family 4, subfamily f, polypeptide 17 (predicted), Cyp4f17_predicted            | 3.1 | -1.0 |
| 1371019_at | tribbles homolog 1 (Drosophila), Trib1                                                           | 3.1 | 1.3  |
| 1370065_at | hemopexin, Hpx                                                                                   | 3.1 | -1.3 |
| 1367801_at | endothelin converting enzyme 1, Ece1                                                             | 3.1 | -1.9 |
| 1379368_at | B-cell leukemia/lymphoma 6 (predicted), Bcl6_predicted                                           | 3.1 | -1.4 |
| 1393162_at | solute carrier family 39 (metal ion transporter), member 6, Slc39a6                              | 3.1 | 1.2  |
| 1386797_at | solute carrier family 39 (metal ion transporter), member 6, Slc39a6                              | 3.1 | 1.3  |
| 1386660_at | ---                                                                                              | 3.1 | -1.2 |
| 1390386_at | caspase 3, apoptosis related cysteine protease, Casp3                                            | 3.1 | 2.0  |
| 1381280_at | methylenetetrahydrofolate dehydrogenase (NADP+ dependent) 2-like (predicted), Mthfd2l_predicted  | 3.1 | 1.7  |
| 1368025_at | DNA-damage-inducible transcript 4, Ddit4                                                         | 3.1 | -1.5 |
| 1374565_at | NIMA (never in mitosis gene a)-related expressed kinase 6, Nek6                                  | 3.1 | -1.2 |
| 1395986_at | slit homolog 2 (Drosophila), Slit2                                                               | 3.1 | 1.6  |
| 1390326_at | angiogenin, ribonuclease A family, member 1, Ang1                                                | 3.1 | -1.0 |
| 1373407_at | Transcribed locus, ---                                                                           | 3.0 | 1.4  |
| 1388425_at | OAF homolog (Drosophila), Oaf                                                                    | 3.0 | 1.5  |
| 1382745_at | Transcribed locus, ---                                                                           | 3.0 | -3.1 |
| 1368231_at | signal transducer and activator of transcription 5A, Stat5a                                      | 3.0 | 1.1  |

|              |                                                                                           |     |      |
|--------------|-------------------------------------------------------------------------------------------|-----|------|
| 1389085_at   | Transcribed locus, ---                                                                    | 3.0 | -1.9 |
| 1392562_at   | family with sequence similarity 128, member B, Fam128b                                    | 3.0 | -1.6 |
| 1367677_at   | peroxiredoxin 5, Prdx5                                                                    | 3.0 | 1.2  |
| 1395850_at   | pseudouridine synthase 3, Pus3                                                            | 3.0 | 1.2  |
| 1367749_at   | lumican, Lum                                                                              | 3.0 | -2.6 |
| 1377955_at   | CDNA clone IMAGE:7383152, ---                                                             | 3.0 | 1.2  |
| 1378499_at   | Transcribed locus, ---                                                                    | 2.9 | -1.4 |
| 1382919_at   | solute carrier family 39 (zinc transporter), member 14 (predicted), Slc39a14_predicted    | 2.9 | -1.6 |
| 1374741_at   | estrogen related receptor, alpha, Esrra                                                   | 2.9 | 1.9  |
| 1384756_at   | solute carrier family 43, member 2 (predicted), Slc43a2_predicted                         | 2.9 | -2.6 |
| 1370807_at   | transmembrane protein 49, Tmem49                                                          | 2.9 | -1.2 |
| 1382948_at   | Rho GTPase activating protein 28, Arhgap28                                                | 2.9 | -1.7 |
| 1387202_at   | intercellular adhesion molecule 1, Icam1                                                  | 2.9 | -1.6 |
| 1371446_at   | MAP kinase-activated protein kinase 2, Mapkapk2                                           | 2.9 | -1.2 |
| 1392905_at   | Guanine nucleotide binding protein, gamma 2, Gng2                                         | 2.9 | 1.4  |
| 1388624_at   | similar to Hypothetical UPF0184 protein C9orf16 homolog (predicted), RGD1561113_predicted | 2.9 | -1.4 |
| 1388659_at   | calcium regulated heat stable protein 1, Carhsp1                                          | 2.9 | -1.0 |
| 1370358_at   | two pore channel 1, Tpcn1                                                                 | 2.9 | 1.6  |
| 1390422_at   | PX domain containing serine/threonine kinase, Pxx                                         | 2.9 | -1.2 |
| 1385620_at   | heat shock 105kDa/110kDa protein 1, Hsph1                                                 | 2.9 | -1.2 |
| 1394965_at   | enthoprotin, Enth                                                                         | 2.9 | -1.1 |
| 1376569_at   | Kruppel-like factor 2 (lung) (predicted), Klf2_predicted                                  | 2.8 | 1.3  |
| 1380318_at   | Transcribed locus, ---                                                                    | 2.8 | -2.8 |
| 1373452_at   | RNA terminal phosphate cyclase-like 1, Rcl1                                               | 2.8 | 1.3  |
| 1371536_at   | calcium regulated heat stable protein 1, Carhsp1                                          | 2.8 | -1.2 |
| 1382995_at   | Transcribed locus, ---                                                                    | 2.8 | -1.5 |
| 1384525_at   | dedicator of cytokinesis 11, Dock11                                                       | 2.8 | 1.5  |
| 1368106_at   | polo-like kinase 2 (Drosophila), Plk2                                                     | 2.8 | 1.1  |
| 1394020_at   | Transcribed locus, ---                                                                    | 2.8 | 1.8  |
| 1368134_a_at | interleukin 4 receptor, alpha, Il4ra                                                      | 2.8 | -2.3 |
| 1371108_a_at | ATPase, Na <sup>+</sup> /K <sup>+</sup> transporting, alpha 1 polypeptide, Atp1a1         | 2.8 | 1.3  |
| 1372599_at   | microsomal glutathione S-transferase 2 (predicted), Mgst2_predicted                       | 2.8 | 1.7  |
| 1389742_at   | Transcribed locus, ---                                                                    | 2.8 | 1.4  |
| 1373219_at   | snail homolog 1 (Drosophila), Snai1                                                       | 2.8 | 1.2  |

|              |                                                                                                                           |     |      |
|--------------|---------------------------------------------------------------------------------------------------------------------------|-----|------|
| 1374157_at   | Phosphodiesterase 4B, cAMP specific, Pde4b                                                                                | 2.8 | -1.7 |
| 1389159_at   | Transcribed locus, ---                                                                                                    | 2.8 | -4.3 |
| 1387109_at   | P450 (cytochrome) oxidoreductase, Por                                                                                     | 2.8 | 1.9  |
| 1370939_at   | acyl-CoA synthetase long-chain family member 1, Acsl1                                                                     | 2.8 | 1.4  |
| 1375526_at   | similar to novel protein of unknown function (DUF423) family member (predicted), RGD1563438_predicted                     | 2.8 | -1.1 |
| 1367943_at   | nuclear factor of kappa light chain gene enhancer in B-cells inhibitor, beta, Nfkbib                                      | 2.8 | -1.4 |
| 1388674_at   | cyclin-dependent kinase inhibitor 1A, Cdkn1a                                                                              | 2.7 | 1.4  |
| 1376835_at   | Solute carrier family 35, member B2, Slc35b2                                                                              | 2.7 | -2.0 |
| 1379477_at   | Transcribed locus, ---                                                                                                    | 2.7 | -1.2 |
| 1370906_at   | branched chain keto acid dehydrogenase E1, beta polypeptide, Bckdhb                                                       | 2.7 | 1.1  |
| 1373734_at   | Solute carrier organic anion transporter family, member 3a1, Slco3a1                                                      | 2.7 | -1.3 |
| 1392971_at   | Transcribed locus, ---                                                                                                    | 2.7 | -4.7 |
| 1370082_at   | transforming growth factor, beta 1, Tgfb1                                                                                 | 2.7 | 1.4  |
| 1379663_at   | Transcribed locus, strongly similar to XP_001479207.1 PREDICTED: similar to Cache domain containing 1 [Mus musculus], --- | 2.7 | 1.0  |
| 1382682_at   | Transcribed locus, ---                                                                                                    | 2.7 | -1.3 |
| 1373421_at   | TG interacting factor 1, Tgif1                                                                                            | 2.7 | 1.4  |
| 1388236_x_at | RT1 class I, CE12, RT1-CE12                                                                                               | 2.7 | -1.5 |
| 1378171_at   | Transcribed locus, ---                                                                                                    | 2.7 | -1.3 |
| 1383149_at   | similar to development and differentiation enhancing factor-like 1, LOC684122                                             | 2.7 | -1.8 |
| 1387784_at   | CDNA clone MGC:187342 IMAGE:8369120, ---                                                                                  | 2.7 | -1.3 |
| 1376568_at   | Transcribed locus, ---                                                                                                    | 2.7 | 1.4  |
| 1377940_at   | family with sequence similarity 101, member B, Fam101b                                                                    | 2.6 | -2.1 |
| 1393108_at   | Transcribed locus, ---                                                                                                    | 2.6 | -1.4 |
| 1372443_at   | low density lipoprotein receptor-related protein 11 (predicted), Lrp11_predicted                                          | 2.6 | -1.3 |
| 1393143_at   | Transcribed locus, ---                                                                                                    | 2.6 | 2.0  |
| 1393961_at   | Transcribed locus, ---                                                                                                    | 2.6 | 1.1  |
| 1379386_at   | G two S phase expressed protein 1, Gtse1                                                                                  | 2.6 | 1.5  |
| 1376321_at   | family with sequence similarity 38, member A (predicted), Fam38a_predicted                                                | 2.6 | 1.5  |
| 1373972_at   | similar to neuron navigator 1, LOC685707                                                                                  | 2.6 | 1.8  |
| 1368953_at   | UDP-glucose ceramide glucosyltransferase-like 1, Ugcgl1                                                                   | 2.6 | 1.2  |
| 1370932_at   | low density lipoprotein receptor-related protein 4, Lrp4                                                                  | 2.6 | 1.0  |

|              |                                                                                                                              |     |      |
|--------------|------------------------------------------------------------------------------------------------------------------------------|-----|------|
| 1387893_at   | complement component 1, s subcomponent, C1s                                                                                  | 2.6 | -2.4 |
| 1380110_at   | Janus kinase 2, Jak2                                                                                                         | 2.6 | -1.0 |
| 1367723_a_at | SH2B adaptor protein 3, Sh2b3                                                                                                | 2.6 | 1.7  |
| 1369125_at   | 5-hydroxytryptamine (serotonin) receptor 2A, Htr2a                                                                           | 2.6 | -1.5 |
| 1385827_at   | cardiotrophin-like cytokine factor 1, Clcf1                                                                                  | 2.6 | 2.5  |
| 1380582_at   | colony stimulating factor 1 (macrophage), Csf1                                                                               | 2.6 | 1.2  |
| 1387225_at   | optic atrophy 1 homolog (human), Opa1                                                                                        | 2.6 | 1.1  |
| 1383560_at   | Transcribed locus, ---                                                                                                       | 2.6 | -2.7 |
| 1377662_at   | pirin, Pir                                                                                                                   | 2.6 | -1.0 |
| 1368207_at   | FXD domain-containing ion transport regulator 5, Fxd5                                                                        | 2.6 | 1.6  |
| 1387391_at   | cyclin-dependent kinase inhibitor 1A, Cdkn1a                                                                                 | 2.6 | 1.8  |
| 1384234_at   | paired related homeobox 1, Prrx1                                                                                             | 2.6 | 1.2  |
| 1369947_at   | cathepsin K, Ctsk                                                                                                            | 2.6 | -1.2 |
| 1389066_at   | regulator of calcineurin 2, Rcan2                                                                                            | 2.6 | -2.9 |
| 1386937_at   | ATPase, Na <sup>+</sup> /K <sup>+</sup> transporting, beta 1 polypeptide, Atp1b1                                             | 2.6 | -1.2 |
| 1392587_at   | Transcribed locus, ---                                                                                                       | 2.6 | -1.1 |
| 1370907_at   | beta galactoside alpha 2,6 sialyltransferase 1, St6gal1                                                                      | 2.6 | 1.3  |
| 1390812_a_at | RAS-like, estrogen-regulated, growth-inhibitor, Rerg                                                                         | 2.6 | -2.5 |
| 1382746_s_at | Transcribed locus, ---                                                                                                       | 2.5 | -3.3 |
| 1374849_at   | a disintegrin-like and metallopeptidase (reprolysin type) with thrombospondin type 1 motif, 7 (predicted), Adamts7_predicted | 2.5 | -2.0 |
| 1375216_at   | poliovirus receptor-related 2, Pvr12                                                                                         | 2.5 | -1.8 |
| 1383860_at   | Fos-like antigen 2, Fosl2                                                                                                    | 2.5 | -1.3 |
| 1373607_at   | ST3 beta-galactoside alpha-2,3-sialyltransferase 3, St3gal3                                                                  | 2.5 | -1.6 |
| 1368488_at   | nuclear factor, interleukin 3 regulated, Nfil3                                                                               | 2.5 | -1.6 |
| 1376813_at   | membrane bound O-acyltransferase domain containing 5, Mboat5                                                                 | 2.5 | 1.2  |
| 1387975_at   | UDP-glucose ceramide glucosyltransferase, Ugcg                                                                               | 2.5 | -1.3 |
| 1397380_at   | Transcribed locus, ---                                                                                                       | 2.5 | 1.2  |
| 1370365_at   | glutathione synthetase, Gss                                                                                                  | 2.5 | 1.7  |
| 1394573_at   | Transcribed locus, ---                                                                                                       | 2.5 | -1.7 |
| 1392489_at   | Transcribed locus, ---                                                                                                       | 2.5 | 1.3  |
| 1397740_at   | sideroflexin 1, Sfxn1                                                                                                        | 2.5 | 1.7  |
| 1370186_at   | transporter 1, ATP-binding cassette, sub-family B (MDR/TAP)                                                                  | 2.5 | 1.1  |
| 1394483_at   | A disintegrin-like and metallopeptidase                                                                                      | 2.5 | -2.4 |

|              |                                                                                                  |     |      |
|--------------|--------------------------------------------------------------------------------------------------|-----|------|
|              | (reprolysin type) with thrombospondin type 1 motif, 5 (aggrecanase-2), Adamts5                   |     |      |
| 1369961_at   | phosphatidic acid phosphatase 2a, Ppap2a                                                         | 2.5 | -2.5 |
| 1394948_at   | Transcribed locus, ---                                                                           | 2.5 | 1.3  |
| 1385485_x_at | similar to Riken cDNA C230021P08 (predicted), RGD1561571_predicted                               | 2.5 | 1.6  |
| 1384934_at   | Solute carrier family 41, member 2 (predicted), Slc41a2_predicted                                | 2.5 | 1.5  |
| 1384997_at   | interferon stimulated exonuclease gene 20-like 1 (predicted), Isg20l1_predicted                  | 2.5 | 1.4  |
| 1392923_at   | Transcribed locus, ---                                                                           | 2.5 | -1.7 |
| 1378156_at   | similar to cystin 1, LOC690489                                                                   | 2.5 | -1.6 |
| 1397766_at   | Transcribed locus, ---                                                                           | 2.4 | 1.6  |
| 1374019_at   | RGD1564379 (predicted), RGD1564379_predicted                                                     | 2.4 | 1.2  |
| 1367585_a_at | ATPase, Na <sup>+</sup> /K <sup>+</sup> transporting, alpha 1 polypeptide, Atp1a1                | 2.4 | 1.1  |
| 1372482_at   | solute carrier family 39 (metal ion transporter), member 13, Slc39a13                            | 2.4 | 1.1  |
| 1388689_at   | similar to Acylphosphatase, muscle type isozyme (Acylphosphate phosphohydrolase), LOC682245      | 2.4 | 1.7  |
| 1385637_at   | Similar to sushi, von Willebrand factor type A, EGF and pentraxin domain containing 1, LOC685899 | 2.4 | -5.2 |
| 1388493_at   | EGFR-coamplified and overexpressed protein, Ecp                                                  | 2.4 | -1.4 |
| 1393891_at   | procollagen, type VIII, alpha 1 (predicted), Col8a1_predicted                                    | 2.4 | 1.6  |
| 1387925_at   | asparagine synthetase, Asns                                                                      | 2.4 | 1.5  |
| 1376379_a_at | similar to RIKEN cDNA 2310004I24 gene, RGD1309906                                                | 2.4 | -1.2 |
| 1373727_at   | fin bud initiation factor, Fbin                                                                  | 2.4 | 1.2  |
| 1379271_at   | suppressor of cytokine signaling 5, Socs5                                                        | 2.4 | 1.5  |
| 1372812_at   | similar to mKIAA0256 protein (predicted), RGD1559930_predicted                                   | 2.4 | -1.0 |
| 1386870_at   | glutamate-ammonia ligase (glutamine synthetase), Glul                                            | 2.4 | -1.0 |
| 1383225_at   | Transcribed locus, ---                                                                           | 2.4 | -5.6 |
| 1397772_at   | CDNA clone IMAGE:7320582, ---                                                                    | 2.4 | -1.5 |
| 1384364_at   | F-box protein 4, Fbxo4                                                                           | 2.4 | -1.3 |
| 1383491_at   | interferon stimulated exonuclease gene 20-like 1 (predicted), Isg20l1_predicted                  | 2.4 | 1.6  |
| 1382296_at   | Transcribed locus, ---                                                                           | 2.4 | -2.4 |
| 1383005_at   | Transcribed locus, ---                                                                           | 2.4 | -1.6 |



|              |                                                                                        |     |      |
|--------------|----------------------------------------------------------------------------------------|-----|------|
| 1372273_at   | glycophorin C (Gerbich blood group), Gypc                                              | 2.4 | 1.0  |
| 1375989_a_at | nuclear factor of kappa light polypeptide gene enhancer in B-cells 2, p49/p100, Nfkb2  | 2.4 | -1.9 |
| 1389230_at   | Transcribed locus, ---                                                                 | 2.4 | 1.1  |
| 1389973_a_at | surfeit 4, Surf4                                                                       | 2.4 | 1.3  |
| 1370531_a_at | phospholipase D1, Pld1                                                                 | 2.3 | -1.7 |
| 1367710_at   | proteasome (prosome, macropain) 28 subunit, beta, Psme2                                | 2.3 | 1.0  |
| 1383485_at   | transformed mouse 3T3 cell double minute 2 homolog (mouse) (predicted), Mdm2_predicted | 2.3 | 1.6  |
| 1388153_at   | acyl-CoA synthetase long-chain family member 1, Acsl1                                  | 2.3 | 1.2  |
| 1379611_at   | splA/ryanodine receptor domain and SOCS box containing 1 (predicted), Spsb1_predicted  | 2.3 | -1.5 |
| 1369690_at   | N-ethylmaleimide sensitive fusion protein, Nsf                                         | 2.3 | 1.0  |
| 1369941_at   | death-associated protein, Dap                                                          | 2.3 | 1.0  |
| 1392668_at   | recombining binding protein suppressor of hairless (Drosophila) (predicted)            | 2.3 | 1.7  |
| 1370693_a_at | 2',3'-cyclic nucleotide 3' phosphodiesterase, Cnp                                      | 2.3 | -1.9 |
| 1392960_at   | similar to RIKEN cDNA 2310004I24 gene, RGD1309906                                      | 2.3 | 1.1  |
| 1372653_at   | FK506 binding protein 11, Fkbp11                                                       | 2.3 | 1.1  |
| 1379736_at   | solute carrier family 43, member 2 (predicted), Slc43a2_predicted                      | 2.3 | -1.6 |
| 1373864_at   | mitogen-activated protein kinase kinase kinase kinase 4 (predicted), Map4k4_predicted  | 2.3 | 1.1  |
| 1377639_at   | adipocyte-specific adhesion molecule, Asam                                             | 2.3 | -1.0 |
| 1372237_at   | Transcribed locus, ---                                                                 | 2.3 | 1.5  |
| 1369931_at   | pyruvate kinase, muscle, Pkm2                                                          | 2.3 | 1.0  |
| 1378168_at   | family with sequence similarity 101, member B, Fam101b                                 | 2.3 | -1.7 |
| 1373751_at   | Transcribed locus, ---                                                                 | 2.3 | -1.3 |
| 1392920_at   | Elongation factor RNA polymerase II-like 3, EIf3                                       | 2.3 | 1.0  |
| 1372818_at   | collectin sub-family member 12, Colec12                                                | 2.3 | -1.7 |
| 1370160_at   | X-prolyl aminopeptidase (aminopeptidase P) 1, soluble, Xpnpep1                         | 2.3 | 1.6  |
| 1367938_at   | UDP-glucose dehydrogenase, Ugdh                                                        | 2.3 | 1.4  |
| 1371442_at   | hypoxia up-regulated 1, Hyou1                                                          | 2.3 | 1.4  |
| 1372750_at   | Transcribed locus, ---                                                                 | 2.3 | -1.1 |
| 1380402_at   | Transcribed locus, ---                                                                 | 2.3 | 1.2  |
| 1372651_at   | Transcribed locus, ---                                                                 | 2.3 | 1.1  |
| 1373310_at   | Transcribed locus, ---                                                                 | 2.3 | -1.8 |
| 1372973_at   | Lanosterol synthase, Lss                                                               | 2.3 | 1.3  |
| 1387670_at   | glycerol-3-phosphate dehydrogenase 2, mitochondrial, Gpd2                              | 2.3 | 1.9  |

|              |                                                                                                     |     |      |
|--------------|-----------------------------------------------------------------------------------------------------|-----|------|
| 1393561_at   | Transcribed locus, ---                                                                              | 2.3 | -1.1 |
| 1388967_at   | transcription factor E3 (predicted),<br>Tcfe3_predicted                                             | 2.3 | 1.0  |
| 1388909_at   | oxidoreductase NAD-binding domain containing<br>1 (predicted), Oxnad1_predicted                     | 2.3 | 1.8  |
| 1376974_at   | tetratricopeptide repeat domain 7, Ttc7                                                             | 2.3 | 1.4  |
| 1369956_at   | interferon gamma receptor 1, Ifngr1                                                                 | 2.3 | -1.8 |
| 1373062_at   | Transcribed locus, ---                                                                              | 2.3 | -2.8 |
| 1388600_at   | CDNA clone IMAGE:7320582, ---                                                                       | 2.3 | -1.2 |
| 1396263_at   | Transcribed locus, ---                                                                              | 2.3 | 1.3  |
| 1389412_at   | ---                                                                                                 | 2.3 | 1.3  |
| 1367675_at   | calcium and integrin binding 1 (calmyrin), Cib1                                                     | 2.3 | -1.0 |
| 1373554_at   | splA/ryanodine receptor domain and SOCS box<br>containing 1 (predicted), Spsb1_predicted            | 2.3 | -1.5 |
| 1388813_at   | ADP-ribosylation factor 2, Arf2                                                                     | 2.3 | -1.1 |
| 1384295_at   | heat shock protein 14, Hspa14                                                                       | 2.3 | 1.2  |
| 1368249_at   | Kruppel-like factor 15, Klf15                                                                       | 2.3 | -4.3 |
| 1370020_at   | solute carrier family 25 (mitochondrial carrier;<br>dicarboxylate transporter), member 10, Slc25a10 | 2.3 | 1.0  |
| 1368322_at   | superoxide dismutase 3, extracellular, Sod3                                                         | 2.2 | -2.2 |
| 1391456_at   | junctional adhesion molecule 3, Jam3                                                                | 2.2 | 1.3  |
| 1367633_at   | glutamate-ammonia ligase (glutamine<br>synthetase), Glul                                            | 2.2 | -1.0 |
| 1389425_at   | similar to 5(3)-deoxyribonucleotidase, cytosolic<br>type, LOC688261                                 | 2.2 | 1.6  |
| 1393336_at   | SWA-70 protein, Swap70                                                                              | 2.2 | 1.1  |
| 1389218_at   | Transcribed locus, ---                                                                              | 2.2 | -1.0 |
| 1390139_a_at | obscurin-like 1, Obsl1                                                                              | 2.2 | -1.6 |
| 1383978_at   | Transcribed locus, ---                                                                              | 2.2 | 1.0  |
| 1378117_at   | Transcribed locus, ---                                                                              | 2.2 | 1.0  |
| 1389039_at   | Transcribed locus, ---                                                                              | 2.2 | -1.6 |
| 1389617_at   | ELK3, member of ETS oncogene family<br>(predicted), Elk3_predicted                                  | 2.2 | 1.3  |
| 1369407_at   | tumor necrosis factor receptor superfamily,<br>member 11b (osteoprotegerin), Tnfrsf11b              | 2.2 | 1.1  |
| 1382277_at   | lymphocyte antigen 96, Ly96                                                                         | 2.2 | 1.5  |
| 1368281_at   | dipeptidase 1 (renal), Dpep1                                                                        | 2.2 | -1.8 |
| 1371791_at   | surfeit 4, Surf4                                                                                    | 2.2 | 1.3  |
| 1367879_at   | CDK5 regulatory subunit associated protein 3,<br>Cdk5rap3                                           | 2.2 | 1.4  |
| 1388331_at   | tumor rejection antigen gp96 (predicted),<br>Tra1_predicted                                         | 2.2 | 1.0  |
| 1389404_at   | forkhead-like 18 (Drosophila), Fkh18                                                                | 2.2 | -1.0 |
| 1376038_at   | testis expressed gene 2, Tex2                                                                       | 2.2 | 1.1  |

|              |                                                                                 |     |      |
|--------------|---------------------------------------------------------------------------------|-----|------|
| 1376315_at   | ER degradation enhancer, mannosidase alpha-like 2, Edem2                        | 2.2 | -1.1 |
| 1379717_at   | similar to ATP-binding cassette, sub-family G (WHITE), member 3, LOC360997      | 2.2 | -1.2 |
| 1382074_at   | ring finger protein 19B, Rnf19b                                                 | 2.2 | 1.9  |
| 1376040_at   | signal-induced proliferation-associated 1 like 2, Sipa1l2                       | 2.2 | 1.1  |
| 1383315_at   | tsukushin, Tsku                                                                 | 2.2 | 1.4  |
| 1371776_at   | Transcribed locus, ---                                                          | 2.2 | 1.1  |
| 1379128_at   | Rho guanine nucleotide exchange factor (GEF) 17 (predicted), Arhgef17_predicted | 2.2 | -1.8 |
| 1393367_at   | polynucleotide kinase 3'-phosphatase, Pnkp                                      | 2.2 | 1.5  |
| 1372471_at   | Transcribed locus, ---                                                          | 2.2 | 1.2  |
| 1376129_at   | Transcribed locus, ---                                                          | 2.2 | 1.1  |
| 1372021_at   | nucleoporin 188, Nup188                                                         | 2.2 | 1.2  |
| 1393713_at   | GDP-mannose 4, 6-dehydratase, Gmds                                              | 2.2 | 1.2  |
| 1374671_at   | Traf3 interacting protein 2, Traf3ip2                                           | 2.2 | -1.3 |
| 1370134_at   | solute carrier family 33 (acetyl-CoA transporter), member 1, Slc33a1            | 2.2 | 1.2  |
| 1389585_at   | ---                                                                             | 2.2 | -1.1 |
| 1379885_at   | flavin containing monooxygenase 4, Fmo4                                         | 2.2 | -3.9 |
| 1373401_at   | Tenascin C, Tnc                                                                 | 2.2 | -1.1 |
| 1390403_at   | family with sequence similarity 43, member A, Fam43a                            | 2.2 | -3.8 |
| 1380357_a_at | Transcribed locus, ---                                                          | 2.1 | 1.2  |
| 1392474_at   | Unc-51 like kinase 2 (C. elegans) (predicted), Ulk2_predicted                   | 2.1 | -1.8 |
| 1369906_s_at | multiple coagulation factor deficiency 2, Mcfd2                                 | 2.1 | 1.7  |
| 1374538_at   | protein O-linked mannose beta1,2-N-acetylglucosaminyltransferase, Pomgnt1       | 2.1 | 1.9  |
| 1374652_at   | Transcribed locus, ---                                                          | 2.1 | 1.2  |
| 1390555_at   | suppressor of cytokine signaling 5, Socs5                                       | 2.1 | 1.6  |
| 1390024_at   | Transcribed locus, ---                                                          | 2.1 | 1.8  |
| 1383241_at   | complement component 1, r subcomponent, C1r                                     | 2.1 | -2.8 |
| 1370928_at   | LPS-induced TN factor, Litaf                                                    | 2.1 | 1.2  |
| 1374601_at   | interferon gamma receptor 2 (predicted), Ifngr2_predicted                       | 2.1 | -1.4 |
| 1371488_at   | similar to SPBPJ4664.02 (predicted)                                             | 2.1 | -1.3 |
| 1370665_at   | hypoxia up-regulated 1, Hyou1                                                   | 2.1 | -1.3 |
| 1385001_at   | gasdermin D, Gsdmd                                                              | 2.1 | 1.2  |
| 1383500_at   | ribosome binding protein 1, Rrbp1                                               | 2.1 | 1.8  |
| 1386958_at   | thioredoxin reductase 1, Txnrd1                                                 | 2.1 | 1.4  |
| 1367764_at   | cyclin G1, Ccng1                                                                | 2.1 | 1.1  |
| 1397164_at   | Transcribed locus, ---                                                          | 2.1 | 1.4  |

|            |                                                                                                |     |      |
|------------|------------------------------------------------------------------------------------------------|-----|------|
| 1377614_at | coiled-coil domain containing 95, Ccdc95                                                       | 2.1 | 1.2  |
| 1376612_at | DTW domain containing 1, Dtwd1                                                                 | 2.1 | 1.1  |
| 1388858_at | mitogen activated protein kinase kinase 3, Map2k3                                              | 2.1 | 1.2  |
| 1388325_at | ATPase, H <sup>+</sup> transporting, lysosomal V1 subunit D, Atp6v1d                           | 2.1 | 1.1  |
| 1368943_at | ribonuclease, RNase A family 4, Rnase4                                                         | 2.1 | -1.3 |
| 1372528_at | N-ethylmaleimide sensitive fusion protein, Nsf                                                 | 2.1 | 1.0  |
| 1396984_at | Transcribed locus, ---                                                                         | 2.1 | -1.1 |
| 1370219_at | cytochrome b-245, alpha polypeptide, Cyba                                                      | 2.1 | -1.4 |
| 1372231_at | transforming growth factor, beta receptor associated protein 1 (predicted), Tgfbrap1_predicted | 2.1 | 1.2  |
| 1374826_at | Transcribed locus, ---                                                                         | 2.1 | -1.2 |
| 1370931_at | X-ray repair complementing defective repair in Chinese hamster cells 5, Xrcc5                  | 2.1 | 1.1  |
| 1395039_at | Transcribed locus, ---                                                                         | 2.1 | -1.1 |
| 1373419_at | Protein tyrosine phosphatase, receptor type, G, Ptprg                                          | 2.1 | 1.2  |
| 1387076_at | hypoxia inducible factor 1, alpha subunit, Hif1a                                               | 2.1 | -1.1 |
| 1367867_at | growth factor, erv1 ( <i>S. cerevisiae</i> )-like (augmenter of liver regeneration), Gfer      | 2.1 | 1.1  |
| 1388460_at | capping protein (actin filament), gelsolin-like, Capg                                          | 2.1 | 1.1  |
| 1368946_at | ADP-ribosylation factor 2, Arf2                                                                | 2.1 | 1.0  |
| 1372804_at | MMR_HSR1 domain containing protein RGD1359460, RGD1359460                                      | 2.1 | 1.6  |
| 1384427_at | transformed mouse 3T3 cell double minute 2 homolog (mouse) (predicted), Mdm2_predicted         | 2.1 | 1.3  |
| 1374953_at | similar to CG12279-PA, LOC500420                                                               | 2.1 | 1.4  |
| 1373924_at | similar to C530044N13Rik protein, RGD1306568                                                   | 2.1 | -1.1 |
| 1393915_at | membrane bound O-acyltransferase domain containing 5, Mboat5                                   | 2.1 | 1.0  |
| 1385999_at | YME1-like 1 ( <i>S. cerevisiae</i> ), Yme111                                                   | 2.1 | -1.9 |
| 1374134_at | ELK3, member of ETS oncogene family (predicted), Elk3_predicted                                | 2.1 | 1.2  |
| 1375517_at | tumor protein p53 inducible nuclear protein 2, Trp53inp2                                       | 2.1 | -2.3 |
| 1370869_at | branched chain aminotransferase 1, cytosolic, Bcat1                                            | 2.1 | 1.1  |
| 1372951_at | Transcribed locus, ---                                                                         | 2.1 | 1.0  |
| 1389091_at | ubiquitin specific peptidase 3, Usp3                                                           | 2.1 | -1.2 |
| 1377743_at | Transcribed locus, ---                                                                         | 2.1 | 1.2  |
| 1371475_at | ribonuclease, RNase A family 4, Rnase4                                                         | 2.1 | -1.1 |
| 1375971_at | ceroid-lipofuscinosis, neuronal 5 (predicted),                                                 | 2.1 | -1.1 |

|              | Cln5_predicted                                                           |     |      |
|--------------|--------------------------------------------------------------------------|-----|------|
| 1369743_a_at | purinergic receptor P2X, ligand-gated ion channel 4, P2rx4               | 2.1 | -2.0 |
| 1375962_at   | Transcribed locus, ---                                                   | 2.1 | -1.0 |
| 1399024_at   | SCY1-like 1 ( <i>S. cerevisiae</i> ), Scy1                               | 2.0 | 1.0  |
| 1377235_a_at | protein phosphatase 2, regulatory subunit B (B56), beta isoform, Ppp2r5b | 2.0 | 1.0  |
| 1395468_at   | Transcribed locus, ---                                                   | 2.0 | -1.3 |
| 1386995_at   | B-cell translocation gene 2, anti-proliferative, Btg2                    | 2.0 | 1.0  |
| 1398508_at   | similar to polyglutamine-containing protein, RGD1310994                  | 2.0 | -1.2 |
| 1372704_at   | DC2 protein, Dc2                                                         | 2.0 | 1.5  |
| 1374564_at   | deltex 2 homolog ( <i>Drosophila</i> ), Dtx2                             | 2.0 | -1.1 |
| 1384724_at   | ---                                                                      | 2.0 | -1.9 |
| 1376605_at   | solute carrier family 17 (anion/sugar transporter), member 5, Slc17a5    | 2.0 | -1.1 |
| 1376680_at   | vacuolar protein sorting 37C (yeast) (predicted), Vps37c_predicted       | 2.0 | -1.1 |
| 1394304_at   | Solute carrier family 33 (acetyl-CoA transporter), member 1, Slc33a1     | 2.0 | 1.5  |
| 1390905_at   | microtubule associated serine/threonine kinase family member 4, Mast4    | 2.0 | 1.1  |
| 1391871_at   | StAR-related lipid transfer (START) domain containing 13, Stard13        | 2.0 | 1.6  |
| 1376810_at   | M-phase phosphoprotein 8, Parp4                                          | 2.0 | -2.2 |
| 1374661_at   | aldehyde dehydrogenase 16 family, member A1, Aldh16a1                    | 2.0 | 1.3  |
| 1389483_at   | Dpy-19-like 1 ( <i>C. elegans</i> ) (predicted), Dpy19l1_predicted       | 2.0 | 1.2  |
| 1387897_at   | 2',3'-cyclic nucleotide 3' phosphodiesterase, Cnp                        | 2.0 | -1.3 |
| 1367632_at   | glutamate-ammonia ligase (glutamine synthetase), Glul                    | 2.0 | -1.2 |
| 1393216_at   | solute carrier family 33 (acetyl-CoA transporter), member 1, Slc33a1     | 2.0 | 1.4  |
| 1388243_at   | G protein-coupled receptor 176, Gpr176                                   | 2.0 | -2.2 |
| 1372277_at   | Transcribed locus, ---                                                   | 2.0 | -1.9 |
| 1369940_at   | transaldolase 1, Taldo1                                                  | 2.0 | 1.4  |
| 1368213_at   | P450 (cytochrome) oxidoreductase, Por                                    | 2.0 | 1.6  |
| 1372776_at   | F-box and leucine-rich repeat protein 5 (predicted), Fbxl5_predicted     | 2.0 | 1.0  |
| 1374215_at   | pleckstrin homology domain containing, family J member 1, Plekhj1        | 2.0 | -1.2 |
| 1371439_at   | erythrocyte membrane protein band 4.1, Epb4.1                            | 2.0 | -1.1 |
| 1381996_at   | Transcribed locus, ---                                                   | 2.0 | 1.9  |

1389525\_at ring finger protein 149, Rnf149

2.0

1.7

---

**Supplemental Table II: Distinctly PDGF-DD-induced genes**

| <b>Accession Number</b> | <b>Gene</b>                                                            | <b>IL-1<math>\beta</math> Fold Change</b> | <b>PDGF-DD Fold Change</b> |
|-------------------------|------------------------------------------------------------------------|-------------------------------------------|----------------------------|
| 1377112_at              | cytidine deaminase (predicted), Cda_predicted                          | -1.7                                      | 41.8                       |
| 1384253_at              | similar to palladin; CGI-151 protein, LOC364558                        | 1.7                                       | 19.1                       |
| 1370834_at              | heparan sulfate (glucosamine) 3-O-sulfotransferase 1, Hs3st1           | 1.2                                       | 15.1                       |
| 1382778_at              | Dual specificity phosphatase 6, Dusp6                                  | 26.5                                      | 12.8                       |
| 1389413_at              | ecotropic viral integration site 2A                                    | 3.5                                       | 12.8                       |
| 1389581_at              | interleukin 33, Il33                                                   | 1.1                                       | 10.8                       |
| 1386679_at              | Transcribed locus, ---                                                 | 2.1                                       | 10.7                       |
| 1368124_at              | dual specificity phosphatase 5, Dusp5                                  | 1.8                                       | 10.6                       |
| 1394600_at              | regulator of G-protein signaling 17 (predicted), Rgs17_predicted       | 1.2                                       | 9.9                        |
| 1384839_at              | Transcribed locus, ---                                                 | -1.3                                      | 9.6                        |
| 1398483_at              | regulator of G-protein signaling 17 (predicted), Rgs17_predicted       | -1.2                                      | 8.3                        |
| 1373970_at              | interleukin 33, Il33                                                   | 1.0                                       | 7.7                        |
| 1391083_at              | Rho GTPase activating protein 22 (predicted), Arhgap22_predicted       | 2.0                                       | 7.5                        |
| 1373957_at              | reelin, Reln                                                           | 1.8                                       | 7.4                        |
| 1392547_at              | hypothetical LOC302884, MGC105649                                      | 4.5                                       | 7.2                        |
| 1370695_s_at            | tribbles homolog 3 (Drosophila), Trib3                                 | 11.1                                      | 6.7                        |
| 1377113_at              | Transcribed locus, ---                                                 | 1.7                                       | 6.5                        |
| 1377404_at              | stanniocalcin 1, Stc1                                                  | -1.6                                      | 5.9                        |
| 1371248_at              | small proline-rich protein 1A, Sprr1a                                  | 1.2                                       | 5.8                        |
| 1370387_at              | cytochrome P450, family 3, subfamily a, polypeptide 9, Cyp3a9          | 6.1                                       | 5.7                        |
| 1392065_at              | Transcribed locus, ---                                                 | 2.1                                       | 5.5                        |
| 1378700_at              | Transcribed locus, ---                                                 | -1.5                                      | 5.3                        |
| 1375014_at              | ADP-ribosylation factor-like 4C, Arl4c                                 | 2.8                                       | 5.1                        |
| 1383019_at              | Transcribed locus, ---                                                 | 14.0                                      | 5.1                        |
| 1369006_at              | hexokinase 2, Hk2                                                      | 1.2                                       | 5.0                        |
| 1373403_at              | similar to Protein C8orf4 (Thyroid cancer protein 1) (TC-1), LOC684871 | 2.2                                       | 4.9                        |
| 1370694_at              | tribbles homolog 3 (Drosophila), Trib3                                 | 4.3                                       | 4.9                        |
| 1369200_at              | 5' nucleotidase, ecto, Nt5e                                            | 5.0                                       | 4.9                        |
| 1394883_at              | Transcribed locus, ---                                                 | 3.6                                       | 4.8                        |
| 1389755_at              | cell division cycle associated 7 like, Cdca7l                          | 2.8                                       | 4.8                        |
| 1389528_s_at            | Jun oncogene, Jun                                                      | -2.1                                      | 4.8                        |
| 1394280_at              | regulator of G-protein signaling 17 (predicted),                       | -3.0                                      | 4.7                        |

|              |                                                                                                                       |      |     |
|--------------|-----------------------------------------------------------------------------------------------------------------------|------|-----|
|              | Rgs17_predicted                                                                                                       |      |     |
| 1395197_at   | Transcribed locus, ---                                                                                                | 7.3  | 4.7 |
| 1368590_at   | matrix metalloproteinase 16, Mmp16                                                                                    | -1.2 | 4.6 |
| 1388891_at   | Transcribed locus, ---                                                                                                | 3.9  | 4.5 |
| 1375473_at   | Transcribed locus, ---                                                                                                | 1.8  | 4.4 |
| 1370492_a_at | FMS-like tyrosine kinase 1, Flt1                                                                                      | 13.6 | 4.4 |
| 1378936_at   | similar to cleavage stimulation factor, 3 pre-RNA subunit 2, LOC683927                                                | -1.2 | 4.4 |
| 1385522_at   | origin recognition complex, subunit 1-like (S.cerevisiae), Orc1l                                                      | -2.4 | 4.4 |
| 1368321_at   | early growth response 1, Egr1                                                                                         | 1.3  | 4.4 |
| 1385781_at   | excision repair cross-complementing rodent repair deficiency complementation group 6-like, Ercc6l                     | 1.8  | 4.3 |
| 1393179_at   | Transcribed locus, ---                                                                                                | 11.2 | 4.3 |
| 1379997_at   | Transcribed locus, ---                                                                                                | 1.7  | 4.3 |
| 1383589_at   | ---                                                                                                                   | -1.3 | 4.3 |
| 1383846_at   | similar to Docking protein 5 (Downstream of tyrosine kinase 5) (Protein dok-5) (predicted), RGD1562846_predicted      | 2.2  | 4.3 |
| 1393684_at   | helicase, lymphoid specific, Hells                                                                                    | 1.7  | 4.2 |
| 1393235_at   | Transcribed locus, ---                                                                                                | 2.3  | 4.2 |
| 1386344_at   | Progressive ankylosis homolog (mouse), Ank                                                                            | -1.5 | 4.2 |
| 1381130_at   | minichromosome maintenance deficient 8 (S. cerevisiae) (predicted), Mcm8_predicted                                    | -1.5 | 4.0 |
| 1393559_at   | Transcribed locus, ---                                                                                                | -1.4 | 4.0 |
| 1367838_at   | cystathionase (cystathionine gamma-lyase), Cth                                                                        | 4.7  | 4.0 |
| 1379345_at   | collagen, type XV, alpha 1, Col15a1                                                                                   | 4.5  | 4.0 |
| 1382960_at   | Transcribed locus, ---                                                                                                | 1.1  | 4.0 |
| 1388939_at   | collagen, type XV, alpha 1, Col15a1                                                                                   | 1.8  | 3.9 |
| 1374359_at   | cyclin E2, Ccne2                                                                                                      | 1.1  | 3.9 |
| 1391075_at   | regulator of G-protein signaling 17 (predicted), Rgs17_predicted                                                      | 1.2  | 3.8 |
| 1396101_at   | stanniocalcin 1, Stc1                                                                                                 | -1.7 | 3.7 |
| 1396214_at   | kit ligand, Kitl                                                                                                      | -1.7 | 3.7 |
| 1384110_at   | ---                                                                                                                   | -1.4 | 3.7 |
| 1372665_at   | phosphoserine aminotransferase 1, Psat1                                                                               | -1.1 | 3.7 |
| 1370047_at   | ectonucleotide                                                                                                        | 1.0  | 3.7 |
|              | pyrophosphatase/phosphodiesterase 1, Enpp1                                                                            |      |     |
| 1378056_at   | geminin (predicted), Gmnn_predicted                                                                                   | 1.4  | 3.6 |
| 1377350_at   | Transcribed locus, weakly similar to XP_001842288.1 seroreactive antigen BMN1-5 [Culex pipiens quinquefasciatus], --- | 1.1  | 3.6 |



|              |                                                                                                                          |      |     |
|--------------|--------------------------------------------------------------------------------------------------------------------------|------|-----|
| 1397226_at   | ---                                                                                                                      | -1.3 | 3.6 |
| 1372843_at   | LOC363020 (predicted),<br>RGD1309410_predicted                                                                           | 2.0  | 3.6 |
| 1387389_at   | receptor (calcitonin) activity modifying protein 3,<br>Ramp3                                                             | 3.0  | 3.5 |
| 1368726_a_at | zinc finger protein 347, Zfp347                                                                                          | 1.7  | 3.5 |
| 1392061_at   | minichromosome maintenance deficient 10 (S.<br>cerevisiae) (predicted), Mcm10_predicted                                  | 1.9  | 3.5 |
| 1383581_at   | similar to CG3880-PA, LOC680531                                                                                          | -1.3 | 3.5 |
| 1374540_at   | cell division cycle associated 7, Cdca7                                                                                  | 1.1  | 3.5 |
| 1379510_at   | Transcribed locus, ---                                                                                                   | -1.2 | 3.5 |
| 1380850_at   | Transcribed locus, ---                                                                                                   | -2.5 | 3.5 |
| 1392446_at   | kelch-like 2, Mayven (Drosophila) (predicted),<br>Klhl2_predicted                                                        | 1.3  | 3.5 |
| 1386435_at   | transcription factor AP4 (predicted),<br>Tcfap4_predicted                                                                | 1.5  | 3.4 |
| 1378507_at   | Transcribed locus, moderately similar to<br>NP_904333.1 ATP synthase F0 subunit 6 [Mus<br>musculus], ---                 | -1.3 | 3.4 |
| 1387851_at   | phosphotriesterase related, Pter                                                                                         | 1.2  | 3.4 |
| 1385724_at   | hypothetical protein LOC682874, LOC682874                                                                                | -1.1 | 3.4 |
| 1379619_at   | Transcribed locus, ---                                                                                                   | 2.1  | 3.4 |
| 1387134_at   | schlafen 3, Slfn3                                                                                                        | 1.2  | 3.4 |
| 1379234_a_at | cell division cycle 45 homolog (S. cerevisiae)-<br>like, Cdc45l                                                          | 1.6  | 3.3 |
| 1371113_a_at | transferrin receptor, Tfrc                                                                                               | 1.1  | 3.3 |
| 1394031_at   | family with sequence similarity 83, member D,<br>Fam83d                                                                  | -2.0 | 3.3 |
| 1399032_at   | excision repair cross-complementing rodent<br>repair deficiency, complementation group 1<br>(predicted), Ercc1_predicted | 1.8  | 3.3 |
| 1369788_s_at | Jun oncogene, Jun                                                                                                        | -1.4 | 3.3 |
| 1375957_at   | Transcribed locus, ---                                                                                                   | 1.8  | 3.3 |
| 1374805_at   | defective in sister chromatid cohesion 1<br>homolog (S. cerevisiae), Dscc1                                               | 1.0  | 3.3 |
| 1383084_at   | Transcribed locus, ---                                                                                                   | 2.3  | 3.3 |
| 1381933_at   | replication factor C (activator 1) 5 (predicted),<br>Rfc5_predicted                                                      | 1.2  | 3.2 |
| 1378640_at   | ubiquitin-like, containing PHD and RING finger<br>domains, 1, Uhrf1                                                      | -1.0 | 3.2 |
| 1389797_at   | Transcribed locus, ---                                                                                                   | 4.3  | 3.2 |
| 1381749_at   | Transcribed locus, ---                                                                                                   | -1.0 | 3.2 |
| 1390141_at   | methylenetetrahydrofolate dehydrogenase<br>(NADP+ dependent) 1-like (predicted),<br>Mthfd1l_predicted                    | 1.7  | 3.2 |

|              |                                                                                                 |      |     |
|--------------|-------------------------------------------------------------------------------------------------|------|-----|
| 1391059_at   | neuropeptide W, Npw                                                                             | 2.9  | 3.2 |
| 1379448_at   | Ttk protein kinase (predicted), Ttk_predicted                                                   | -1.7 | 3.2 |
| 1369249_at   | progressive ankylosis, Ank                                                                      | -1.3 | 3.2 |
| 1369625_at   | aquaporin 1, Aqp1                                                                               | -3.8 | 3.2 |
| 1393439_a_at | progressive ankylosis, Ank                                                                      | -1.6 | 3.2 |
| 1380831_at   | Transcribed locus, ---                                                                          | -3.2 | 3.1 |
| 1390415_at   | thyroid hormone receptor interactor 13, Trip13                                                  | 1.0  | 3.1 |
| 1392274_at   | Transcribed locus, ---                                                                          | -6.0 | 3.1 |
| 1389919_at   | parvin, beta (predicted), Parvb_predicted                                                       | -1.7 | 3.1 |
| 1370034_at   | cell division cycle 25 homolog B (S. pombe), Cdc25b                                             | -1.1 | 3.1 |
| 1389440_at   | Transcribed locus, ---                                                                          | -1.1 | 3.1 |
| 1375377_at   | immunoglobulin superfamily, member 3 (predicted), Igsf3_predicted                               | -2.0 | 3.0 |
| 1378906_at   | similar to hypothetical protein FLJ25416 (predicted), RGD1559690_predicted                      | 1.4  | 3.0 |
| 1368677_at   | brain derived neurotrophic factor, Bdnf                                                         | -1.1 | 3.0 |
| 1380277_at   | RAD51 associated protein 1, Rad51ap1                                                            | 1.5  | 3.0 |
| 1371193_at   | tumor necrosis factor alpha induced protein 6, Tnfaip6                                          | 2.2  | 3.0 |
| 1387371_at   | cell division cycle 25 homolog A (S. pombe), Cdc25a                                             | -1.0 | 3.0 |
| 1393451_at   | centromere protein N, Cenpn                                                                     | 1.5  | 3.0 |
| 1389457_at   | myeloblastosis oncogene-like 2 (predicted), Mybl2_predicted                                     | -1.0 | 3.0 |
| 1378120_at   | Transcribed locus, ---                                                                          | -1.2 | 3.0 |
| 1396144_at   | Similar to Traf2 and NCK interacting kinase, splice variant 4 (predicted), RGD1561817_predicted | -2.2 | 3.0 |
| 1377424_at   | Transcribed locus, ---                                                                          | -1.2 | 3.0 |
| 1377967_at   | chromatin licensing and DNA replication factor 1, Cdt1                                          | -1.1 | 2.9 |
| 1369087_at   | FMS-like tyrosine kinase 1, Flt1                                                                | 1.2  | 2.9 |
| 1385723_at   | Transcribed locus, ---                                                                          | 1.1  | 2.9 |
| 1381298_at   | minichromosome maintenance deficient 10 (S. cerevisiae) (predicted), Mcm10_predicted            | 1.2  | 2.9 |
| 1393844_at   | myeloid leukemia factor 1 interacting protein, Mlf1ip                                           | 1.6  | 2.9 |
| 1392829_at   | similar to cleavage stimulation factor, 3 pre-RNA subunit 2, LOC683927                          | -1.0 | 2.9 |
| 1391201_at   | WD repeat and HMG-box DNA binding protein 1 (predicted), Wdhd1_predicted                        | -1.6 | 2.9 |
| 1388856_at   | kit ligand, Kitl                                                                                | -2.3 | 2.9 |
| 1395944_at   | Transcribed locus, ---                                                                          | -1.3 | 2.9 |
| 1368799_at   | baculoviral IAP repeat-containing 5, Birc5                                                      | 1.7  | 2.9 |

|              |                                                                                                            |      |     |
|--------------|------------------------------------------------------------------------------------------------------------|------|-----|
| 1383519_at   | Hexokinase 2, Hk2                                                                                          | 1.4  | 2.9 |
| 1397476_at   | Ttk protein kinase (predicted), Ttk_predicted                                                              | -4.0 | 2.9 |
| 1393982_at   | polymerase (DNA directed), epsilon 2 (p59 subunit) (predicted), Pole2_predicted                            | -1.4 | 2.8 |
| 1368983_at   | heparin-binding EGF-like growth factor, Hbegf                                                              | -2.3 | 2.8 |
| 1388618_at   | nidogen 2, Nid2                                                                                            | -1.2 | 2.8 |
| 1370422_at   | receptor-interacting serine-threonine kinase 3, Ripk3                                                      | 1.8  | 2.8 |
| 1376027_at   | ---                                                                                                        | -1.6 | 2.8 |
| 1376639_at   | ring finger protein 126, Rnf126                                                                            | -1.0 | 2.8 |
| 1382592_at   | coiled-coil domain containing 99, Ccdc99                                                                   | -1.1 | 2.8 |
| 1395361_at   | Deoxyuridine triphosphatase, Dut                                                                           | 1.6  | 2.8 |
| 1368226_at   | Nucleoside 2-deoxyribosyltransferase domain containing protein RGD620382, RGD620382                        | 1.5  | 2.8 |
| 1382964_at   | ---                                                                                                        | 1.2  | 2.8 |
| 1380895_at   | Transcribed locus, ---                                                                                     | 1.1  | 2.8 |
| 1368391_at   | solute carrier family 7 (cationic amino acid transporter, y+ system), member 1, Slc7a1                     | 1.3  | 2.8 |
| 1382188_at   | G patch domain containing 4, Gpatch4                                                                       | -4.6 | 2.8 |
| 1390481_a_at | ubiquitin-conjugating enzyme E2T (putative) (predicted), Ube2t_predicted                                   | 1.2  | 2.8 |
| 1394401_at   | ELOVL family member 6, elongation of long chain fatty acids (yeast), Elovl6                                | -1.4 | 2.8 |
| 1369338_at   | roundabout homolog 1 (Drosophila), Robo1                                                                   | 1.7  | 2.8 |
| 1373068_at   | interferon-related developmental regulator 2 (predicted), Ifrd2_predicted                                  | -1.4 | 2.7 |
| 1388721_at   | heat shock protein 8, Hspb8                                                                                | 1.4  | 2.7 |
| 1382783_at   | Bloom syndrome homolog (human) (predicted), Blm_predicted                                                  | -1.1 | 2.7 |
| 1376055_at   | minichromosome maintenance deficient 5, cell division cycle 46 (S. cerevisiae) (predicted), Mcm5_predicted | -1.2 | 2.7 |
| 1391051_at   | Transcribed locus, ---                                                                                     | 1.3  | 2.7 |
| 1384268_at   | cyclin Y-like 1, Ccnyl1                                                                                    | 1.1  | 2.7 |
| 1380030_at   | zinc finger protein 593, Zfp593                                                                            | 1.9  | 2.7 |
| 1378556_at   | Transcribed locus, ---                                                                                     | -1.4 | 2.7 |
| 1371074_a_at | minichromosome maintenance deficient 6 (MIS5 homolog, S. pombe) (S. cerevisiae), Mcm6                      | -1.3 | 2.7 |
| 1376065_at   | RRS1 ribosome biogenesis regulator homolog (S. cerevisiae) (predicted), Rrs1_predicted                     | 1.2  | 2.7 |
| 1395998_at   | nucleolar protein 5A, Nol5a                                                                                | -1.7 | 2.7 |
| 1379957_at   | schlafen 8, Slfn8                                                                                          | 1.5  | 2.7 |
| 1378199_at   | leucine zipper protein 5 (predicted), Luzp5_predicted                                                      | 2.3  | 2.7 |

|              |                                                                                                                                |      |     |
|--------------|--------------------------------------------------------------------------------------------------------------------------------|------|-----|
| 1383685_at   | HEAT repeat containing 1 (predicted),<br>Heatr1_predicted                                                                      | -1.0 | 2.7 |
| 1398602_at   | MAD2 (mitotic arrest deficient, homolog)-like 1<br>(yeast) (predicted), Mad2l1_predicted                                       | 1.5  | 2.7 |
| 1392449_at   | RAD18 homolog ( <i>S. cerevisiae</i> ) (predicted),<br>Rad18_predicted                                                         | -1.5 | 2.7 |
| 1386466_at   | Transcribed locus, ---                                                                                                         | -1.0 | 2.7 |
| 1397676_at   | ---                                                                                                                            | 1.2  | 2.7 |
| 1377387_a_at | Transcribed locus, strongly similar to<br>NP_079738.2 endothelin converting enzyme 2<br>isoform c [ <i>Mus musculus</i> ], --- | 1.8  | 2.7 |
| 1371785_at   | tumor necrosis factor receptor superfamily,<br>member 12a, Tnfrsf12a                                                           | 1.7  | 2.7 |
| 1392576_at   | similar to protein C33A12.3, RGD1359508                                                                                        | -1.1 | 2.7 |
| 1383578_at   | RAD51 homolog ( <i>S. cerevisiae</i> ), Rad51                                                                                  | 1.1  | 2.7 |
| 1389582_at   | CDNA clone MGC:187947 IMAGE:9103164, ---                                                                                       | 1.2  | 2.7 |
| 1391518_at   | hypothetical protein LOC689399, LOC689399                                                                                      | 1.2  | 2.6 |
| 1389450_at   | Williams Beuren syndrome chromosome region<br>22, Wbscr22                                                                      | 1.4  | 2.6 |
| 1393020_at   | zinc finger, MYM-type 6, Zmym6                                                                                                 | 1.1  | 2.6 |
| 1373884_at   | kelch-like 2, Mayven ( <i>Drosophila</i> ) (predicted),<br>Klhl2_predicted                                                     | 1.4  | 2.6 |
| 1372406_at   | minichromosome maintenance deficient 3 ( <i>S.</i><br><i>cerevisiae</i> ) (predicted), Mcm3_predicted                          | 1.2  | 2.6 |
| 1388872_at   | Transcribed locus, ---                                                                                                         | -1.2 | 2.6 |
| 1380725_at   | tetraspanin 5, Tspan5                                                                                                          | -1.3 | 2.6 |
| 1377797_at   | EMG1 nucleolar protein homolog ( <i>S.</i><br><i>cerevisiae</i> ) (predicted), Emg1_predicted                                  | -1.2 | 2.6 |
| 1383675_at   | Transcribed locus, strongly similar to<br>NP_955518.1 ribosomal RNA processing 12<br>homolog [ <i>Mus musculus</i> ], ---      | 1.1  | 2.6 |
| 1373162_at   | similar to transmembrane protein 41a,<br>LOC681708                                                                             | 1.1  | 2.6 |
| 1380768_at   | Transcribed locus, ---                                                                                                         | 2.3  | 2.6 |
| 1373786_at   | zinc finger protein 703, Zfp703                                                                                                | 1.7  | 2.6 |
| 1387848_at   | 3-hydroxy-3-methylglutaryl-Coenzyme A<br>reductase, Hmgcr                                                                      | 1.4  | 2.6 |
| 1370177_at   | poliovirus receptor, PVR                                                                                                       | 1.4  | 2.6 |
| 1385086_at   | budding uninhibited by benzimidazoles 1<br>homolog ( <i>S. cerevisiae</i> ) (predicted),<br>Bub1_predicted                     | -1.3 | 2.6 |
| 1389668_at   | SPC25, NDC80 kinetochore complex<br>component, homolog ( <i>S. cerevisiae</i> ), Spc25                                         | -1.5 | 2.6 |
| 1372156_at   | transmembrane protein 97, Tmem97                                                                                               | 1.4  | 2.6 |
| 1377689_at   | kinetochore associated 1 (predicted),                                                                                          | -1.8 | 2.6 |

|              |                                                                                                                       |      |     |
|--------------|-----------------------------------------------------------------------------------------------------------------------|------|-----|
|              | Kntc1_predicted                                                                                                       |      |     |
| 1385709_x_at | Transcribed locus, ---                                                                                                | -1.6 | 2.6 |
| 1379296_at   | Transcribed locus, ---                                                                                                | 1.4  | 2.6 |
| 1397567_at   | Transcribed locus, ---                                                                                                | 1.3  | 2.6 |
| 1374734_at   | hypothetical protein LOC680254, LOC680254                                                                             | 1.3  | 2.6 |
| 1371928_at   | cell division cycle associated 8, Cdca8                                                                               | -1.1 | 2.6 |
| 1389542_at   | centromere protein E (predicted),<br>Cenpe_predicted                                                                  | 6.9  | 2.6 |
| 1380243_at   | Similar to CG14803-PA (predicted),<br>RGD1304693_predicted                                                            | 1.1  | 2.6 |
| 1368033_at   | nucleolar and coiled-body phosphoprotein 1,<br>Nolc1                                                                  | -1.7 | 2.6 |
| 1388353_at   | proliferation-associated 2G4, Pa2g4                                                                                   | 1.8  | 2.6 |
| 1374857_at   | nucleolar protein family A, member 1 (H/ACA<br>small nucleolar RNPs), Nola1                                           | 1.3  | 2.6 |
| 1379235_x_at | cell division cycle 45 homolog (S. cerevisiae)-<br>like, Cdc45l                                                       | 1.3  | 2.6 |
| 1370910_at   | replication factor C (activator 1) 2, Rfc2                                                                            | 1.4  | 2.6 |
| 1373538_at   | ubiquitin specific peptdiase 1, Usp1                                                                                  | 1.6  | 2.6 |
| 1384231_at   | similar to Shc SH2-domain binding protein 1,<br>LOC687121                                                             | -2.5 | 2.6 |
| 1385733_at   | exonuclease 1 (predicted), Exo1_predicted                                                                             | -1.4 | 2.6 |
| 1386178_at   | Transcribed locus, ---                                                                                                | -1.2 | 2.6 |
| 1381857_at   | RAS p21 protein activator 1, Rasa1                                                                                    | 1.2  | 2.6 |
| 1378940_at   | SHQ1 homolog (S. cerevisiae) (predicted),<br>Shq1_predicted                                                           | 1.6  | 2.6 |
| 1374404_at   | Jun oncogene, Jun                                                                                                     | -1.5 | 2.6 |
| 1371133_a_at | protein kinase, cAMP dependent regulatory,<br>type II beta, Prkar2b                                                   | -1.1 | 2.5 |
| 1377625_at   | tRNA methyltransferase 6 homolog (S.<br>cerevisiae), Trmt6                                                            | 1.2  | 2.5 |
| 1367894_at   | insulin induced gene 1, Insig1                                                                                        | 1.5  | 2.5 |
| 1367834_at   | spermidine synthase, Srm                                                                                              | 1.3  | 2.5 |
| 1376104_at   | similar to KIAA0802 protein (predicted),<br>RGD1308319_predicted                                                      | -1.2 | 2.5 |
| 1380775_at   | M-phase phosphoprotein 1 (predicted),<br>Mphosph1_predicted                                                           | -1.2 | 2.5 |
| 1374864_at   | sprouty homolog 2 (Drosophila), Spry2                                                                                 | 1.8  | 2.5 |
| 1384174_at   | ---                                                                                                                   | -1.2 | 2.5 |
| 1375060_at   | Transcribed locus, moderately similar to<br>NP_081539.1 apoptosis-inducing, TAF9-like<br>domain 1 [Mus musculus], --- | 1.2  | 2.5 |
| 1387048_at   | DEAD (Asp-Glu-Ala-Asp) box polypeptide 39,<br>Ddx39                                                                   | 1.7  | 2.5 |
| 1376026_at   | downstream neighbor of SON, Donson                                                                                    | -1.5 | 2.5 |

|            |                                                                                                                   |      |     |
|------------|-------------------------------------------------------------------------------------------------------------------|------|-----|
| 1370258_at | basic leucine zipper and W2 domains 2, Bzw2                                                                       | 1.5  | 2.5 |
| 1389380_at | similar to Folylpolyglutamate synthase, mitochondrial precursor (Folylpoly-gamma-glutamate synthetase), LOC687266 | -1.0 | 2.5 |
| 1372318_at | Transcribed locus, ---                                                                                            | -1.4 | 2.5 |
| 1371849_at | 5'-nucleotidase domain containing 2, Nt5dc2                                                                       | 1.2  | 2.5 |
| 1390579_at | similar to RIKEN cDNA 1810029B16 (predicted), RGD1305222_predicted                                                | 1.0  | 2.5 |
| 1388901_at | FK506 binding protein 5, Fkbp5                                                                                    | 1.3  | 2.5 |
| 1390272_at | DPH5 homolog ( <i>S. cerevisiae</i> ), Dph5                                                                       | 1.2  | 2.5 |
| 1384259_at | Rac GTPase-activating protein 1 (predicted), Racgap1_predicted                                                    | -1.4 | 2.5 |
| 1386969_at | neuritin 1, Nrn1                                                                                                  | -1.1 | 2.5 |
| 1382511_at | E2F transcription factor 1, E2f1                                                                                  | -2.1 | 2.5 |
| 1388340_at | NS5A (hepatitis C virus) transactivated protein 9, Ns5atp9                                                        | 1.0  | 2.5 |
| 1384124_at | Transcribed locus, ---                                                                                            | -1.1 | 2.5 |
| 1390383_at | adipose differentiation related protein, Adfp                                                                     | 1.7  | 2.5 |
| 1393848_at | ribonucleotide reductase M2, Rrm2                                                                                 | -1.7 | 2.5 |
| 1398756_at | nucleophosmin 1, Npm1                                                                                             | 1.5  | 2.5 |
| 1388341_at | RAN GTPase activating protein 1, Rangap1                                                                          | 1.0  | 2.5 |
| 1382193_at | CDGSH iron sulfur domain 2, Cisd2                                                                                 | 1.0  | 2.5 |
| 1372631_at | thymidine kinase 1, Tk1                                                                                           | -1.2 | 2.5 |
| 1393173_at | RAS p21 protein activator 1, Rasa1                                                                                | 1.2  | 2.5 |
| 1376681_at | similar to RIKEN cDNA 1500003O22, RGD1308302                                                                      | -2.1 | 2.5 |
| 1396086_at | transmembrane protein 97, Tmem97                                                                                  | 1.2  | 2.5 |
| 1384068_at | cytoskeleton associated protein 2 (predicted), Ckap2_predicted                                                    | 1.2  | 2.5 |
| 1383926_at | budding uninhibited by benzimidazoles 1 homolog, beta ( <i>S. cerevisiae</i> ), Bub1b                             | -1.2 | 2.5 |
| 1372059_at | similar to RIKEN cDNA 2610528E23, RGD1309437                                                                      | 1.4  | 2.5 |
| 1395635_at | tumor necrosis factor receptor superfamily, member 26 (predicted), Tnfrsf26_predicted                             | 1.7  | 2.5 |
| 1379967_at | zinc finger protein 367, Zfp367                                                                                   | -2.0 | 2.5 |
| 1389081_at | vacuolar protein sorting 37B (yeast) (predicted), Vps37b_predicted                                                | 1.1  | 2.5 |
| 1370344_at | heat shock protein 4, Hspa4                                                                                       | -1.1 | 2.5 |
| 1397704_at | ---                                                                                                               | 2.1  | 2.4 |
| 1393128_at | G patch domain containing 4, Gpatch4                                                                              | 1.1  | 2.4 |
| 1388458_at | replication factor C (activator 1) 4 (predicted), Rfc4_predicted                                                  | -1.0 | 2.4 |
| 1387926_at | sterol-C5-desaturase (fungal ERG3, delta-5-desaturase) homolog ( <i>S. cerevisiae</i> ), Sc5d                     | -1.1 | 2.4 |

|              |                                                                                        |      |     |
|--------------|----------------------------------------------------------------------------------------|------|-----|
| 1372106_at   | EH-domain containing 4, Ehd4                                                           | 1.5  | 2.4 |
| 1377992_at   | Transcribed locus, ---                                                                 | 1.7  | 2.4 |
| 1384338_at   | cell division cycle 45 homolog (S. cerevisiae)-like, Cdc45l                            | 1.4  | 2.4 |
| 1382459_at   | ---                                                                                    | 2.9  | 2.4 |
| 1381833_at   | cell division cycle associated 2, Cdca2                                                | -5.4 | 2.4 |
| 1388436_at   | small nuclear ribonucleoprotein polypeptide A, Snrpa                                   | 1.3  | 2.4 |
| 1369736_at   | epithelial membrane protein 1, Emp1                                                    | -1.2 | 2.4 |
| 1372012_at   | 24-dehydrocholesterol reductase, Dhcr24                                                | 1.1  | 2.4 |
| 1392733_at   | similar to mirror-image polydactyly 1, LOC687620                                       | -1.1 | 2.4 |
| 1367795_at   | interferon-related developmental regulator 1, lfrd1                                    | -1.3 | 2.4 |
| 1368126_at   | acetoacetyl-CoA synthetase, Aacs                                                       | -1.0 | 2.4 |
| 1370085_at   | RAS p21 protein activator 1, Rasa1                                                     | 1.0  | 2.4 |
| 1376816_at   | Transcribed locus, ---                                                                 | -1.3 | 2.4 |
| 1394869_at   | Transcribed locus, ---                                                                 | -1.0 | 2.4 |
| 1370875_at   | villin 2, Vil2                                                                         | -1.4 | 2.4 |
| 1388750_at   | transferrin receptor, Tfrc                                                             | 1.3  | 2.4 |
| 1390542_at   | Rad51 homolog c (S. cerevisiae), Rad51c                                                | 1.7  | 2.4 |
| 1385619_at   | kinesin family member 11, Kif11                                                        | 1.4  | 2.4 |
| 1388622_at   | nucleolar protein 5A, Nol5a                                                            | 1.0  | 2.4 |
| 1386073_at   | Similar to T-Brain-1, LOC311078                                                        | 1.4  | 2.4 |
| 1387280_a_at | solute carrier family 7 (cationic amino acid transporter, y+ system), member 5, Slc7a5 | 1.1  | 2.4 |
| 1384265_at   | polymerase (DNA-directed), delta 3, accessory subunit, Pold3                           | 2.0  | 2.4 |
| 1377619_at   | WD repeat domain 36 (predicted), Wdr36_predicted                                       | 1.2  | 2.4 |
| 1373224_at   | ST3 beta-galactoside alpha-2,3-sialyltransferase 4, St3gal4                            | 1.6  | 2.4 |
| 1375186_at   | DPH3, KTI11 homolog (S. cerevisiae), Dph3                                              | 1.7  | 2.4 |
| 1370346_at   | cyclin B1, Ccnb1                                                                       | -1.3 | 2.4 |
| 1387196_at   | KH domain containing, RNA binding, signal transduction associated 3, Khdrbs3           | -1.7 | 2.4 |
| 1383767_at   | Transcribed locus, ---                                                                 | 2.0  | 2.4 |
| 1376098_a_at | myosin IG, Myo1g                                                                       | -1.1 | 2.4 |
| 1377778_at   | ischemia related factor vof-16, Vof16                                                  | -1.1 | 2.4 |
| 1384326_at   | Transcribed locus, ---                                                                 | -1.3 | 2.4 |
| 1370355_at   | stearoyl-Coenzyme A desaturase 1, Scd1                                                 | 4.2  | 2.4 |
| 1368400_at   | translocase of inner mitochondrial membrane 8 homolog a1 (yeast), Timm8a1              | -1.0 | 2.4 |
| 1386426_at   | ATPase, Ca++ transporting, plasma membrane                                             | 1.8  | 2.4 |

|              |                                                                                       |      |     |
|--------------|---------------------------------------------------------------------------------------|------|-----|
|              | 1, Atp2b1                                                                             |      |     |
| 1378489_at   | Transcribed locus, ---                                                                | 1.7  | 2.4 |
| 1390237_at   | translocase of inner mitochondrial membrane 8 homolog a1 (yeast), Timm8a1             | -1.1 | 2.4 |
| 1387233_at   | hydroxysteroid (17-beta) dehydrogenase 7, Hsd17b7                                     | 1.2  | 2.4 |
| 1384988_at   | F-box protein 5, Fbxo5                                                                | -1.3 | 2.4 |
| 1374072_at   | Transcribed locus, ---                                                                | -1.1 | 2.4 |
| 1393191_at   | similar to RIKEN cDNA 2610200G18 (predicted), RGD1561205_predicted                    | -1.4 | 2.4 |
| 1368275_at   | sterol-C4-methyl oxidase-like, Sc4mol                                                 | 1.2  | 2.4 |
| 1388484_at   | ubiquitin-conjugating enzyme E2C (predicted), Ube2c_predicted                         | 1.2  | 2.4 |
| 1388695_at   | serine hydroxymethyltransferase 2 (mitochondrial), Shmt2                              | 1.1  | 2.4 |
| 1389430_at   | Transcribed locus, ---                                                                | -1.1 | 2.3 |
| 1397609_at   | TRAF4 associated factor 1, Traf4af1                                                   | 1.0  | 2.3 |
| 1398553_at   | transmembrane emp24 protein transport domain containing 5, Tmed5                      | 1.6  | 2.3 |
| 1371908_at   | NTF2-related export protein 1 (predicted), Nxt1_predicted                             | 1.0  | 2.3 |
| 1373439_at   | Transcribed locus, ---                                                                | 1.1  | 2.3 |
| 1392554_a_at | ---                                                                                   | -1.2 | 2.3 |
| 1376231_at   | GINS complex subunit 1 (Psf1 homolog), Gins1                                          | -1.1 | 2.3 |
| 1392688_at   | Ras association (RalGDS/AF-6) domain family 1, Rassf1                                 | 1.7  | 2.3 |
| 1373960_at   | transmembrane protein 120A, Tmem120a                                                  | 1.8  | 2.3 |
| 1374794_at   | kinesin family member 15, Kif15                                                       | -1.7 | 2.3 |
| 1377175_at   | Transcribed locus, ---                                                                | -2.0 | 2.3 |
| 1370345_at   | cyclin B1, Ccnb1                                                                      | -1.3 | 2.3 |
| 1377299_at   | nuclear autoantigenic sperm protein (histone-binding), Nasp                           | -1.2 | 2.3 |
| 1372729_at   | protein C receptor, endothelial, Procr                                                | 2.3  | 2.3 |
| 1399077_at   | similar to Metaxin 1, isoform 2, LOC295241                                            | 1.1  | 2.3 |
| 1373558_at   | Transcribed locus, ---                                                                | 2.4  | 2.3 |
| 1389446_at   | ---                                                                                   | -1.1 | 2.3 |
| 1392589_at   | replication factor C (activator 1) 5 (predicted), Rfc5_predicted                      | -1.2 | 2.3 |
| 1385109_at   | Josephin domain containing 3, Josd3                                                   | -1.3 | 2.3 |
| 1369061_at   | glutathione reductase, Gsr                                                            | 1.0  | 2.3 |
| 1376951_at   | MAD2 (mitotic arrest deficient, homolog)-like 1 (yeast) (predicted), Mad211_predicted | -1.0 | 2.3 |
| 1390321_at   | similar to CG14803-PA (predicted), RGD1304693_predicted                               | -1.3 | 2.3 |
| 1368165_at   | phosphoribosyl pyrophosphate synthetase 1,                                            | -1.1 | 2.3 |



|              |                                                                                                        |      |     |
|--------------|--------------------------------------------------------------------------------------------------------|------|-----|
|              | Prps1                                                                                                  |      |     |
| 1390113_a_at | La ribonucleoprotein domain family, member 1 (predicted), Larp1_predicted                              | -1.2 | 2.3 |
| 1395828_at   | kinesin family member 23 (predicted), Kif23_predicted                                                  | -2.6 | 2.3 |
| 1379592_at   | solute carrier family 25 (mitochondrial carrier, adenine nucleotide translocator), member 13, Slc25a13 | 1.3  | 2.3 |
| 1368085_at   | GTP cyclohydrolase I feedback regulator, Gchfr                                                         | 1.2  | 2.3 |
| 1391626_at   | meiotic nuclear divisions 1 homolog (S. cerevisiae), Mnd1                                              | 1.5  | 2.3 |
| 1376737_at   | hypothetical protein LOC690243, LOC690243                                                              | -1.5 | 2.3 |
| 1389401_at   | ---                                                                                                    | 1.5  | 2.3 |
| 1374449_at   | cell division cycle associated 3, Cdca3                                                                | -1.1 | 2.3 |
| 1392040_at   | spindle assembly 6 homolog (C. elegans) (predicted), Sass6_predicted                                   | -2.4 | 2.3 |
| 1370821_at   | thiopurine methyltransferase, Tpm1                                                                     | 1.3  | 2.3 |
| 1368100_at   | phosphate cytidylyltransferase 2, ethanolamine, Pcyt2                                                  | 1.2  | 2.3 |
| 1375071_at   | nucleoporin 133 (predicted), Nup133_predicted                                                          | 1.1  | 2.3 |
| 1392881_at   | ST3 beta-galactoside alpha-2,3-sialyltransferase 4, St3gal4                                            | 1.5  | 2.3 |
| 1368074_at   | galactose-4-epimerase, UDP, Gale                                                                       | 1.4  | 2.3 |
| 1388182_at   | DNA primase, p49 subunit, Prim1                                                                        | -1.6 | 2.3 |
| 1377833_at   | Rap1 interacting factor 1 homolog (yeast), Rif1                                                        | -1.5 | 2.3 |
| 1380100_at   | Similar to Traf2 and NCK interacting kinase, splice variant 4 (predicted), RGD1561817_predicted        | -2.7 | 2.3 |
| 1375981_a_at | suppressor of variegation 3-9 homolog 1 (Drosophila) (predicted), Suv39h1_predicted                    | 1.1  | 2.3 |
| 1373772_at   | DNA methyltransferase (cytosine-5) 1, Dnmt1                                                            | -1.8 | 2.3 |
| 1384331_at   | sulfiredoxin 1 homolog (S. cerevisiae), Srxn1                                                          | 2.8  | 2.3 |
| 1373489_at   | chromatin assembly factor 1, subunit A (p150), Chaf1a                                                  | -1.5 | 2.3 |
| 1383987_at   | Transcribed locus, ---                                                                                 | 1.5  | 2.3 |
| 1371040_at   | solute carrier family 1 (neutral amino acid transporter), member 5, Slc1a5                             | 1.1  | 2.3 |
| 1374354_at   | PHD finger protein 19 (predicted), Phf19_predicted                                                     | 1.9  | 2.3 |
| 1389844_at   | FK506 binding protein 4, Fkbp4                                                                         | -1.3 | 2.3 |
| 1392818_at   | growth arrest specific 5, Gas5                                                                         | -1.5 | 2.2 |
| 1367983_at   | flap structure-specific endonuclease 1, Fen1                                                           | 1.6  | 2.2 |
| 1373767_at   | zinc finger, AN1-type domain 2A, Zfand2a                                                               | 1.4  | 2.2 |
| 1380009_at   | vaccinia related kinase 1, Vrk1                                                                        | 1.2  | 2.2 |
| 1374036_at   | minichromosome maintenance deficient 2                                                                 | -1.2 | 2.2 |

|            |                                                                                                          |      |     |
|------------|----------------------------------------------------------------------------------------------------------|------|-----|
|            | mitotin ( <i>S. cerevisiae</i> ) (predicted),<br>Mcm2_predicted                                          |      |     |
| 1396063_at | DEK oncogene (DNA binding), Dek                                                                          | -1.0 | 2.2 |
| 1378296_at | non-SMC condensin I complex, subunit H,<br>Ncaph                                                         | -1.3 | 2.2 |
| 1384041_at | Transcribed locus, ---                                                                                   | 2.3  | 2.2 |
| 1392111_at | exosome component 3 (predicted),<br>Exosc3_predicted                                                     | 1.2  | 2.2 |
| 1393033_at | tyrosyl-tRNA synthetase 2 (mitochondrial),<br>Yars2                                                      | 1.2  | 2.2 |
| 1383660_at | Transcribed locus, ---                                                                                   | -1.1 | 2.2 |
| 1392732_at | nucleolar and spindle associated protein 1<br>(predicted), Nusap1_predicted                              | -1.4 | 2.2 |
| 1372886_at | transforming, acidic coiled-coil containing<br>protein 3, Tacc3                                          | 1.4  | 2.2 |
| 1392499_at | phosphoribosylformylglycinamide synthase<br>(FGAR amidotransferase) (predicted),<br>Pfas_predicted       | 1.1  | 2.2 |
| 1373989_at | Ras association (RalGDS/AF-6) domain family<br>1, Rassf1                                                 | 1.1  | 2.2 |
| 1367886_at | proprotein convertase subtilisin/kexin type 7,<br>Pcsk7                                                  | 1.9  | 2.2 |
| 1387017_at | squalene epoxidase, Sqle                                                                                 | 1.1  | 2.2 |
| 1381817_at | Transcribed locus, ---                                                                                   | 1.4  | 2.2 |
| 1383684_at | ASF1 anti-silencing function 1 homolog B ( <i>S.</i><br><i>cerevisiae</i> ) (predicted), Asf1b_predicted | 1.0  | 2.2 |
| 1388108_at | ELOVL family member 6, elongation of long<br>chain fatty acids (yeast), Elovl6                           | -1.5 | 2.2 |
| 1374775_at | antigen identified by monoclonal antibody Ki-67<br>(predicted), Mki67_predicted                          | -1.3 | 2.2 |
| 1374945_at | GCD14/PCMT domain containing protein<br>RGD1359191, RGD1359191                                           | 1.3  | 2.2 |
| 1371712_at | similar to snRNP core protein SMX5,<br>LOC684148                                                         | 1.2  | 2.2 |
| 1385220_at | Zwilch, kinetochore associated, homolog<br>( <i>Drosophila</i> ), Zwilch                                 | -1.2 | 2.2 |
| 1368005_at | inositol 1,4,5-triphosphate receptor 3, Itpr3                                                            | 2.3  | 2.2 |
| 1383323_at | DSN1, MIND kinetochore complex component,<br>homolog ( <i>S. cerevisiae</i> ), Dsn1                      | 1.1  | 2.2 |
| 1393647_at | histone aminotransferase 1, Hat1                                                                         | -1.2 | 2.2 |
| 1376831_at | family with sequence similarity 64, member A,<br>Fam64a                                                  | -1.0 | 2.2 |
| 1377021_at | tRNA methyltransferase 6 homolog ( <i>S.</i><br><i>cerevisiae</i> ), Trmt6                               | 1.2  | 2.2 |
| 1372009_at | tyrosyl-tRNA synthetase, Yars                                                                            | -1.1 | 2.2 |
| 1386586_at | PAK1 interacting protein 1, Pak1ip1                                                                      | 1.6  | 2.2 |

|              |                                                                                                                  |      |     |
|--------------|------------------------------------------------------------------------------------------------------------------|------|-----|
| 1379582_a_at | cyclin A2, Ccna2                                                                                                 | 1.0  | 2.2 |
| 1372389_at   | immediate early response 2, Ier2                                                                                 | 2.0  | 2.2 |
| 1395118_at   | RNA (guanine-9-) methyltransferase domain containing 2, Rg9mtd2                                                  | -1.0 | 2.2 |
| 1382661_at   | nucleoporin 160 (predicted), Nup160_predicted                                                                    | -1.5 | 2.2 |
| 1389858_at   | thymidine kinase 1, Tk1                                                                                          | 1.1  | 2.2 |
| 1370408_at   | putative small membrane protein NID67, Nid67                                                                     | 1.0  | 2.2 |
| 1369012_at   | inhibin beta-A, Inhba                                                                                            | 2.3  | 2.2 |
| 1386913_at   | podoplanin, Pdpn                                                                                                 | 1.6  | 2.2 |
| 1372182_at   | phosphofructokinase, platelet, Pfkp                                                                              | 1.5  | 2.2 |
| 1379479_at   | kinesin family member 4, Kif4                                                                                    | -1.1 | 2.2 |
| 1383298_at   | LOC363015 (predicted), RGD1310444_predicted                                                                      | 2.8  | 2.2 |
| 1390077_at   | Translocation associated membrane protein 1, Tram1                                                               | -1.2 | 2.2 |
| 1371608_at   | mitochondrial ribosomal protein S34 (predicted), Mrps34_predicted                                                | 1.4  | 2.2 |
| 1368522_at   | timeless homolog (Drosophila), Timeless                                                                          | -2.6 | 2.2 |
| 1370080_at   | heme oxygenase (decycling) 1, Hmox1                                                                              | 1.4  | 2.2 |
| 1375987_at   | ceramide kinase (predicted), CerK_predicted                                                                      | 1.7  | 2.2 |
| 1379989_at   | similar to Antxr2 protein, LOC305633                                                                             | 2.0  | 2.2 |
| 1368204_at   | ligase I, DNA, ATP-dependent, Lig1                                                                               | 1.0  | 2.2 |
| 1370386_at   | RuvB-like protein 1, Ruvb1                                                                                       | 1.5  | 2.2 |
| 1389485_at   | transformed mouse 3T3 cell double minute 1, Mdm1                                                                 | 1.3  | 2.2 |
| 1373658_at   | Rac GTPase-activating protein 1 (predicted), Racgap1_predicted                                                   | -1.6 | 2.2 |
| 1377832_at   | polo-like kinase 4 (Drosophila) (predicted), Plk4_predicted                                                      | 1.5  | 2.2 |
| 1373530_at   | cyclin E1, Ccne1                                                                                                 | 2.3  | 2.2 |
| 1380303_at   | similar to Serine/threonine-protein kinase Haspin (Haploid germ cell-specific nuclear protein kinase), LOC687827 | 1.4  | 2.2 |
| 1389326_at   | replication factor C (activator 1) 3, Rfc3                                                                       | -1.1 | 2.2 |
| 1388397_at   | EBNA1 binding protein 2, Ebna1bp2                                                                                | 1.1  | 2.2 |
| 1393581_at   | asp (abnormal spindle)-like, microcephaly associated (Drosophila) (predicted), Aspm_predicted                    | 1.3  | 2.2 |
| 1376185_at   | kinesin family member C1, Kifc1                                                                                  | -1.2 | 2.2 |
| 1389738_at   | uracil-DNA glycosylase, Ung                                                                                      | 1.3  | 2.2 |
| 1383805_at   | ---                                                                                                              | -1.8 | 2.2 |
| 1372051_at   | rhomboid domain containing 2, Rhbdd2                                                                             | 1.7  | 2.2 |
| 1373114_at   | Transcribed locus, ---                                                                                           | -1.0 | 2.2 |
| 1367780_at   | pituitary tumor-transforming 1, Pttg1                                                                            | 1.3  | 2.2 |

|              |                                                                                        |      |     |
|--------------|----------------------------------------------------------------------------------------|------|-----|
| 1375612_at   | Transcribed locus, ---                                                                 | 1.2  | 2.2 |
| 1373046_at   | DAZ associated protein 1, Dazap1                                                       | 1.2  | 2.2 |
| 1376611_at   | Polymerase (DNA directed), alpha 1, Pola1                                              | -1.3 | 2.2 |
| 1387269_s_at | plasminogen activator, urokinase receptor, Plaur                                       | 1.4  | 2.2 |
| 1368273_at   | mitogen-activated protein kinase 6, Mapk6                                              | 1.5  | 2.2 |
| 1390777_at   | sterol-C5-desaturase (fungal ERG3, delta-5-desaturase) homolog (S. cerevisiae), Sc5d   | -1.3 | 2.2 |
| 1379195_s_at | ligase I, DNA, ATP-dependent, Lig1                                                     | 1.1  | 2.1 |
| 1375412_at   | Transcribed locus, ---                                                                 | 1.5  | 2.1 |
| 1370050_at   | ATPase, Ca <sup>++</sup> transporting, plasma membrane 1, Atp2b1                       | 2.0  | 2.1 |
| 1387062_a_at | checkpoint kinase 1 homolog (S. pombe), Chek1                                          | -1.1 | 2.1 |
| 1374799_at   | non-SMC condensin I complex, subunit D2, Ncapd2                                        | -1.4 | 2.1 |
| 1376039_at   | aurora kinase A, Aurka                                                                 | 1.1  | 2.1 |
| 1389421_at   | polymerase (DNA directed), epsilon, Pole                                               | -2.2 | 2.1 |
| 1389279_at   | Transcribed locus, ---                                                                 | -1.1 | 2.1 |
| 1375282_at   | cerebral cavernous malformation 2 (predicted), Ccm2_predicted                          | -1.3 | 2.1 |
| 1385606_at   | brain protein 16, Brp16                                                                | 1.0  | 2.1 |
| 1384252_at   | similar to hypothetical protein BC015148 (predicted), RGD1309095_predicted             | 1.1  | 2.1 |
| 1367933_at   | S-adenosylmethionine decarboxylase 1, Amd1                                             | 1.1  | 2.1 |
| 1376914_at   | DEP domain containing 1a (predicted), Depdc1a_predicted                                | -1.2 | 2.1 |
| 1383741_at   | Transcribed locus, ---                                                                 | 1.0  | 2.1 |
| 1376291_at   | ---                                                                                    | 1.8  | 2.1 |
| 1373085_at   | carbonyl reductase 3 (predicted), Cbr3_predicted                                       | -1.3 | 2.1 |
| 1371367_at   | TAR DNA binding protein, Tardbp                                                        | -1.1 | 2.1 |
| 1373677_at   | solute carrier family 39 (zinc transporter), member 10 (predicted), Slc39a10_predicted | 1.9  | 2.1 |
| 1398439_a_at | origin recognition complex, subunit 6-like (S. cerevisiae), Orc6l                      | -1.2 | 2.1 |
| 1379337_at   | FAST kinase domains 2, Fastkd2                                                         | -1.1 | 2.1 |
| 1372903_at   | similar to 3000004C01Rik protein, RGD1310360                                           | 1.2  | 2.1 |
| 1389017_at   | similar to Antxr2 protein, LOC305633                                                   | 1.8  | 2.1 |
| 1392440_at   | ---                                                                                    | -3.8 | 2.1 |
| 1373557_at   | minichromosome maintenance deficient 4 homolog (S. cerevisiae), Mcm4                   | 1.6  | 2.1 |
| 1371862_at   | ribonucleotide reductase M1, Rrm1                                                      | -1.1 | 2.1 |
| 1390384_at   | H2A histone family, member X, H2afx                                                    | 1.1  | 2.1 |

|              |                                                                                                        |      |     |
|--------------|--------------------------------------------------------------------------------------------------------|------|-----|
| 1370245_at   | cathepsin L, Ctsl                                                                                      | 1.4  | 2.1 |
| 1391889_at   | Transcribed locus, ---                                                                                 | 2.0  | 2.1 |
| 1374840_at   | similar to peptidyl prolyl isomerase H (predicted), RGD1564921_predicted                               | 1.2  | 2.1 |
| 1373935_at   | polymerase (DNA directed), delta 2, regulatory subunit, Pold2                                          | -1.7 | 2.1 |
| 1369617_at   | ubiquitin-conjugating enzyme E2N, Ube2n                                                                | 1.2  | 2.1 |
| 1368031_at   | nucleolar and coiled-body phosphoprotein 1, Nolc1                                                      | 1.1  | 2.1 |
| 1387795_at   | polymerase (DNA directed), alpha 2, Pola2                                                              | 1.7  | 2.1 |
| 1372957_at   | Transcribed locus, ---                                                                                 | -3.3 | 2.1 |
| 1398618_s_at | Transcribed locus, ---                                                                                 | -1.1 | 2.1 |
| 1387085_at   | phosphoribosyl pyrophosphate synthetase 1, Prps1                                                       | -1.2 | 2.1 |
| 1370323_at   | thimet oligopeptidase 1, Thop1                                                                         | 1.3  | 2.1 |
| 1388953_at   | guanine nucleotide binding protein-like 3 (nucleolar), Gnl3                                            | -1.1 | 2.1 |
| 1374113_at   | bromodomain adjacent to zinc finger domain, 1A (predicted), Baz1a_predicted                            | 1.6  | 2.1 |
| 1376084_a_at | extra spindle poles like 1 (S. cerevisiae) (predicted), Esp11_predicted                                | 1.5  | 2.1 |
| 1373741_at   | pseudouridine synthase 1, Pus1                                                                         | 1.6  | 2.1 |
| 1377627_at   | UTP20, small subunit (SSU) processome component, homolog (yeast), Utp20                                | 1.1  | 2.1 |
| 1373722_at   | kinesin family member 20A (predicted), Kif20a_predicted                                                | -1.5 | 2.1 |
| 1397556_at   | N-acetyltransferase 13, Nat13                                                                          | 1.3  | 2.1 |
| 1368392_at   | solute carrier family 7 (cationic amino acid transporter, y+ system), member 1, Slc7a1                 | 1.0  | 2.1 |
| 1395557_at   | Transcribed locus, ---                                                                                 | 1.0  | 2.1 |
| 1372942_at   | exosome component 5 (predicted), Exosc5_predicted                                                      | 1.2  | 2.1 |
| 1386762_at   | sorting nexin 18, Snx18                                                                                | 1.2  | 2.1 |
| 1390650_at   | nucleoporin 85, Nup85                                                                                  | 1.1  | 2.1 |
| 1391415_at   | partner of NOB1 homolog (S. cerevisiae), Pno1                                                          | 1.2  | 2.1 |
| 1398394_at   | Transcribed locus, ---                                                                                 | 1.0  | 2.1 |
| 1389622_at   | solute carrier family 25 (mitochondrial carrier, adenine nucleotide translocator), member 13, Slc25a13 | 1.3  | 2.1 |
| 1386888_at   | eukaryotic translation initiation factor 4E binding protein 1, Eif4ebp1                                | 1.6  | 2.1 |
| 1393041_at   | structural maintenance of chromosomes 2, Smc2                                                          | 1.0  | 2.1 |
| 1388744_at   | minichromosome maintenance deficient 7 (S. cerevisiae), Mcm7                                           | 1.0  | 2.1 |

|            |                                                                                                                      |      |     |
|------------|----------------------------------------------------------------------------------------------------------------------|------|-----|
| 1377823_at | Transcribed locus, ---                                                                                               | -1.0 | 2.1 |
| 1388911_at | DNA primase, p58 subunit, Prim2                                                                                      | -1.1 | 2.1 |
| 1374497_at | nicalin homolog (zebrafish), Ncln                                                                                    | 1.5  | 2.1 |
| 1384232_at | Transcribed locus, ---                                                                                               | 1.8  | 2.1 |
| 1376319_at | Transcribed locus, ---                                                                                               | 1.0  | 2.1 |
| 1381163_at | Transcribed locus, ---                                                                                               | 1.2  | 2.1 |
| 1372343_at | exosome component 8 (predicted),<br>Exosc8_predicted                                                                 | -1.2 | 2.1 |
| 1374506_at | DEAD/H (Asp-Glu-Ala-Asp/His) box<br>polypeptide 31 (predicted), Ddx31_predicted                                      | -1.0 | 2.1 |
| 1373701_at | Transcribed locus, ---                                                                                               | -1.4 | 2.0 |
| 1376722_at | nucleoporin 205, Nup205                                                                                              | 1.0  | 2.0 |
| 1373280_at | RuvB-like protein 2, Ruvbl2                                                                                          | 1.2  | 2.0 |
| 1398308_at | replication protein A3 (predicted),<br>Rpa3_predicted                                                                | 1.1  | 2.0 |
| 1383486_at | Transcribed locus, ---                                                                                               | 2.0  | 2.0 |
| 1374836_at | RRP9, small subunit (SSU) processome<br>component, homolog (yeast), Rrp9                                             | 1.1  | 2.0 |
| 1378259_at | TAR DNA binding protein, Tardbp                                                                                      | -1.0 | 2.0 |
| 1376317_at | origin recognition complex, subunit 6-like (S.<br>cerevisiae), Orc6l                                                 | -1.6 | 2.0 |
| 1367970_at | profilin 2, Pfn2                                                                                                     | -2.6 | 2.0 |
| 1390982_at | chromatin assembly factor 1, subunit B (p60),<br>Chaf1b                                                              | 1.0  | 2.0 |
| 1368032_at | nucleolar and coiled-body phosphoprotein 1,<br>Nolc1                                                                 | 1.1  | 2.0 |
| 1387151_at | nucleoporin 107, Nup107                                                                                              | 1.3  | 2.0 |
| 1393257_at | CUG triplet repeat, RNA binding protein 1,<br>Cugbp1                                                                 | 1.1  | 2.0 |
| 1374323_at | BRCA2 and CDKN1A interacting protein<br>(predicted), Bccip_predicted                                                 | 1.4  | 2.0 |
| 1395246_at | Transcribed locus, ---                                                                                               | -1.2 | 2.0 |
| 1367811_at | 3-phosphoglycerate dehydrogenase, Phgdh                                                                              | -2.0 | 2.0 |
| 1375972_at | similar to membrane protein expressed in<br>epithelial-like lung adenocarcinoma (predicted),<br>RGD1307493_predicted | -1.0 | 2.0 |
| 1391466_at | ---                                                                                                                  | -1.1 | 2.0 |
| 1394419_at | Rho GTPase activating protein 11A, Arhgap11a                                                                         | 1.2  | 2.0 |
| 1369018_at | forkhead box M1, Foxm1                                                                                               | 1.1  | 2.0 |
| 1394854_at | telomeric repeat binding factor 1, Terf1                                                                             | -1.2 | 2.0 |
| 1382385_at | proteasome (prosome, macropain) 26S<br>subunit, ATPase, 6                                                            | -1.0 | 2.0 |
| 1371542_at | tubulin, alpha 4A, Tuba4a                                                                                            | -1.0 | 2.0 |
| 1391317_at | similar to RIKEN cDNA 2810433K01<br>(predicted), RGD1310784_predicted                                                | -1.7 | 2.0 |

|            |                                                                                     |      |     |
|------------|-------------------------------------------------------------------------------------|------|-----|
| 1373026_at | SPC24, NDC80 kinetochore complex component, homolog ( <i>S. cerevisiae</i> ), Spc24 | -1.6 | 2.0 |
| 1367495_at | similar to prefoldin 4 (predicted), RGD1560211_predicted                            | 1.1  | 2.0 |
| 1393158_at | centromere protein Q, Cenpq                                                         | -1.3 | 2.0 |
| 1383238_at | queuine tRNA-ribosyltransferase 1, Qtrt1                                            | 1.2  | 2.0 |
| 1389695_at | family with sequence similarity 20, member C, Fam20c                                | 1.0  | 2.0 |
| 1382370_at | cyclin F, Ccnf                                                                      | 1.1  | 2.0 |
| 1375852_at | 3-hydroxy-3-methylglutaryl-Coenzyme A reductase, Hmgcr                              | 1.1  | 2.0 |
| 1389471_at | translocase of outer mitochondrial membrane 34 (predicted), Tomm34_predicted        | 1.3  | 2.0 |
| 1372043_at | MRT4, mRNA turnover 4, homolog ( <i>S. cerevisiae</i> ), Mrto4                      | 1.2  | 2.0 |
| 1371839_at | splicing factor, arginine/serine-rich 2 (SC-35), Sfrs2                              | -1.0 | 2.0 |
| 1374897_at | similar to THO complex subunit 4 (Tho4), LOC688305                                  | 1.1  | 2.0 |
| 1368588_at | DEAD (Asp-Glu-Ala-Asp) box polypeptide 52, Ddx52                                    | 2.0  | 2.0 |
| 1378137_at | leucine rich repeat containing 59, Lrrc59                                           | 1.8  | 2.0 |
| 1376001_at | polymerase (RNA) I polypeptide E, Polr1e                                            | 1.4  | 2.0 |
| 1374340_at | Transcribed locus, ---                                                              | -1.4 | 2.0 |
| 1389756_at | maternal embryonic leucine zipper kinase (predicted), Melk_predicted                | -1.3 | 2.0 |
| 1383222_at | CDNA clone IMAGE:7446637, ---                                                       | 1.7  | 2.0 |
| 1395363_at | ---                                                                                 | 1.4  | 2.0 |
| 1369499_at | thymidylate synthase, Tyms                                                          | 1.3  | 2.0 |
| 1370308_at | XTP3-transactivated protein A, Xtp3tpa                                              | 1.4  | 2.0 |
| 1384439_at | ---                                                                                 | -1.1 | 2.0 |
| 1392514_at | brix domain containing 1 (predicted), Bxdc1_predicted                               | 1.1  | 2.0 |

---

**Supplemental Table III: IL-1 $\beta$  and PDGF-DD commonly upregulated genes in SMCs**

| <b>Accession Number</b> | <b>Gene</b>                                                                    | <b>IL-1<math>\beta</math> Fold Change</b> | <b>PDGF-DD Fold Change</b> |
|-------------------------|--------------------------------------------------------------------------------|-------------------------------------------|----------------------------|
| 1367802_at              | serum/glucocorticoid regulated kinase, Sgk                                     | 2.4                                       | 4.3                        |
| 1368021_at              | alcohol dehydrogenase 1 (class I), Adh1                                        | 2.0                                       | 4.0                        |
| 1368078_at              | endothelial cell-specific molecule 1, Esm1                                     | 48.0                                      | 5.8                        |
| 1368144_at              | regulator of G-protein signaling 2, Rgs2                                       | 40.6                                      | 2.2                        |
| 1368489_at              | fos-like antigen 1, Fosl1                                                      | 6.1                                       | 10.3                       |
| 1368512_a_at            | glutamyl aminopeptidase, Enpep                                                 | 28.9                                      | 2.5                        |
| 1368527_at              | prostaglandin-endoperoxide synthase 2, Ptgs2                                   | 6.3                                       | 2.3                        |
| 1368860_at              | pleckstrin homology-like domain, family A, member 1, Phlda1                    | 16.1                                      | 2.6                        |
| 1368921_a_at            | CD44 antigen, Cd44                                                             | 21.3                                      | 3.2                        |
| 1369415_at              | basic helix-loop-helix domain containing, class B2, Bhlhb2                     | 3.8                                       | 2.3                        |
| 1369534_at              | interleukin 11, Il11                                                           | 32.9                                      | 34.7                       |
| 1370074_at              | brain-specific angiogenesis inhibitor 1-associated protein 2, Baiap2           | 10.6                                      | 2.2                        |
| 1370075_at              | dihydrofolate reductase, Dhfr                                                  | 3.0                                       | 2.4                        |
| 1370281_at              | fatty acid binding protein 5, epidermal, Fabp5                                 | 10.9                                      | 2.7                        |
| 1370313_at              | acyl-CoA thioesterase 7, Acot7                                                 | 2.1                                       | 2.4                        |
| 1370314_at              | solute carrier family 20 (phosphate transporter), member 1, Slc20a1            | 3.6                                       | 2.5                        |
| 1370374_at              | STEAP family member 3, Steap3                                                  | 2.6                                       | 2.1                        |
| 1370609_a_at            | solute carrier family 16 (monocarboxylic acid transporters), member 7, Slc16a7 | 2.8                                       | 3.2                        |
| 1370817_at              | SEC11 homolog C ( <i>S. cerevisiae</i> ), Sec11c                               | 2.9                                       | 3.2                        |
| 1370902_at              | aldo-keto reductase family 1, member B8, Akr1b8                                | 23.9                                      | 3.3                        |
| 1371150_at              | cyclin D1, Ccnd1                                                               | 5.4                                       | 4.9                        |
| 1371232_a_at            | versican, Vcan                                                                 | 10.8                                      | 2.5                        |
| 1371643_at              | cyclin D1, Ccnd1                                                               | 6.1                                       | 5.1                        |
| 1371774_at              | spermidine/spermine N1-acetyl transferase 1, Sat1                              | 3.1                                       | 2.3                        |
| 1372510_at              | sulfiredoxin 1 homolog ( <i>S. cerevisiae</i> ), Srxn1                         | 2.1                                       | 2.7                        |
| 1372655_at              | ---                                                                            | 2.7                                       | 2.3                        |
| 1372691_at              | uridine phosphorylase 1, Upp1                                                  | 316.7                                     | 3.4                        |
| 1372805_at              | LOC363015 (predicted), RGD1310444_predicted                                    | 4.4                                       | 2.3                        |
| 1374117_at              | brain-specific angiogenesis inhibitor 1-associated protein 2, Baiap2           | 5.6                                       | 2.9                        |



|              |                                                                                                                      |      |      |
|--------------|----------------------------------------------------------------------------------------------------------------------|------|------|
| 1374143_at   | Eph receptor A2 (predicted), Epha2_predicted                                                                         | 3.8  | 3.7  |
| 1374228_at   | similar to Tripartite motif protein 47, Trim47                                                                       | 4.4  | 2.9  |
| 1374845_at   | Transcribed locus, ---                                                                                               | 4.6  | 2.6  |
| 1375184_at   | Transcribed locus, ---                                                                                               | 11.0 | 11.6 |
| 1375845_at   | androgen-induced 1, Aig1                                                                                             | 2.8  | 3.0  |
| 1376362_at   | neuronal pentraxin receptor, Nptxr                                                                                   | 2.6  | 3.1  |
| 1376435_at   | Transcribed locus, ---                                                                                               | 34.6 | 2.4  |
| 1376513_a_at | Transcribed locus, ---                                                                                               | 3.4  | 2.6  |
| 1376801_at   | RGD1564450 (predicted),<br>RGD1564450_predicted                                                                      | 4.6  | 3.0  |
| 1377016_at   | cysteine-rich with EGF-like domains 2, Creld2                                                                        | 2.0  | 2.0  |
| 1377064_at   | dual specificity phosphatase 6, Dusp6                                                                                | 34.4 | 10.5 |
| 1378001_at   | Transcribed locus, ---                                                                                               | 4.6  | 2.4  |
| 1378133_at   | solute carrier family 7 (cationic amino acid<br>transporter, y+ system), member 11<br>(predicted), Slc7a11_predicted | 10.4 | 7.0  |
| 1378440_at   | Transcribed locus, ---                                                                                               | 2.6  | 2.0  |
| 1378462_at   | Transcribed locus, ---                                                                                               | 2.1  | 3.4  |
| 1378552_at   | mitogen-activated protein kinase kinase<br>kinase 6 (predicted), Map3k6_predicted                                    | 3.1  | 2.4  |
| 1378867_at   | Transcribed locus, ---                                                                                               | 6.8  | 8.8  |
| 1379714_at   | hypothetical protein LOC688459, rCG_43687                                                                            | 5.3  | 4.1  |
| 1379910_at   | UDP-N-acetylglucosamine pyrophosphorylase<br>1, Uap1                                                                 | 2.5  | 3.0  |
| 1380028_at   | ADP-ribosylation factor-like 4C, Arl4c                                                                               | 3.3  | 7.4  |
| 1380168_at   | ets variant gene 4 (E1A enhancer binding<br>protein, E1AF) (predicted), Etv4_predicted                               | 26.2 | 3.0  |
| 1381279_at   | receptor (TNFRSF)-interacting serine-<br>threonine kinase 2, Ripk2                                                   | 9.4  | 5.6  |
| 1381341_at   | hypothetical protein LOC688459, rCG_43687                                                                            | 7.8  | 3.7  |
| 1381986_at   | similar to neuron navigator 1, LOC685707                                                                             | 3.2  | 2.0  |
| 1382387_at   | transmembrane protein 16A (predicted),<br>Tmem16a_predicted                                                          | 5.0  | 5.1  |
| 1382688_at   | solute carrier family 25, member 37, Slc25a37                                                                        | 4.8  | 3.6  |
| 1383075_at   | cyclin D1, Ccnd1                                                                                                     | 10.7 | 3.7  |
| 1383447_at   | ets variant gene 5, Etv5                                                                                             | 7.7  | 3.1  |
| 1384112_at   | 5' nucleotidase, ecto, Nt5e                                                                                          | 3.4  | 6.6  |
| 1385150_at   | Transcribed locus, ---                                                                                               | 3.5  | 3.9  |
| 1385182_at   | plakophilin 1 (predicted), Pkp1_predicted                                                                            | 6.7  | 3.0  |
| 1385702_at   | interferon activated gene 204, Ifi204                                                                                | 27.3 | 2.3  |
| 1386890_at   | S100 calcium binding protein A10 (calpactin),<br>S100a10                                                             | 2.2  | 2.3  |
| 1386953_at   | hydroxysteroid 11-beta dehydrogenase 1,<br>Hsd11b1                                                                   | 55.5 | 2.1  |

|              |                                                                                      |      |     |
|--------------|--------------------------------------------------------------------------------------|------|-----|
| 1387024_at   | dual specificity phosphatase 6, Dusp6                                                | 6.2  | 6.7 |
| 1387028_a_at | inhibitor of DNA binding 1, Id1                                                      | 4.8  | 3.7 |
| 1387074_at   | regulator of G-protein signaling 2, Rgs2                                             | 24.2 | 2.2 |
| 1387101_at   | acyl-CoA synthetase long-chain family member 4, Acsl4                                | 4.7  | 2.5 |
| 1387260_at   | Kruppel-like factor 4 (gut), Klf4                                                    | 32.8 | 3.1 |
| 1387273_at   | interleukin 1 receptor-like 1, Il1rl1                                                | 23.3 | 3.4 |
| 1387566_at   | phospholipase A2, group IVA (cytosolic, calcium-dependent), Pla2g4a                  | 2.7  | 2.0 |
| 1387690_at   | caspase 3, apoptosis related cysteine protease, Casp3                                | 3.2  | 2.3 |
| 1387952_a_at | CD44 antigen, Cd44                                                                   | 21.1 | 3.2 |
| 1388054_a_at | versican, Vcan                                                                       | 14.0 | 2.2 |
| 1388142_at   | versican, Vcan                                                                       | 9.7  | 2.1 |
| 1388309_at   | high mobility group AT-hook 1, Hmga1                                                 | 19.4 | 7.2 |
| 1389355_at   | immediate early response 5, Ier5                                                     | 2.7  | 2.4 |
| 1389463_at   | protein kinase, cAMP dependent regulatory, type I, beta, Prkar1b                     | 4.7  | 2.5 |
| 1389862_at   | nucleolar protein 12, Nol12                                                          | 2.1  | 2.3 |
| 1390306_at   | Transcribed locus, ---                                                               | 6.9  | 3.4 |
| 1390502_at   | similar to RIKEN cDNA 1700025G04 gene (predicted), RGD1309104_predicted              | 3.1  | 2.8 |
| 1390659_at   | Transcribed locus, ---                                                               | 15.8 | 2.6 |
| 1393373_at   | opsin 3, Opn3                                                                        | 4.1  | 2.9 |
| 1393728_at   | Transcribed locus, ---                                                               | 20.2 | 2.6 |
| 1394527_at   | Transcribed locus, ---                                                               | 8.3  | 4.3 |
| 1395966_at   | potassium channel tetramerisation domain containing 14 (predicted), Kctd14_predicted | 2.8  | 2.2 |
| 1397644_at   | Methylthioadenosine phosphorylase (predicted), Mtap_predicted                        | 2.2  | 3.5 |
| 1397953_at   | similar to AMSH-family protein, LOC687696                                            | 2.3  | 2.5 |
| 1398295_at   | solute carrier family 29 (nucleoside transporters), member 1, Slc29a1                | 8.5  | 3.5 |

---

**Supplemental Table IV: Distinctly IL-1 $\beta$ -repressed genes in SMCs**

| <b>Accession</b> | <b>Gene</b>                                                                        | <b>IL-1<math>\beta</math><br/>Fold<br/>Change</b> | <b>PDGF-DD<br/>Fold<br/>Change</b> |
|------------------|------------------------------------------------------------------------------------|---------------------------------------------------|------------------------------------|
| 1390783_at       | ATP-binding cassette, sub-family A (ABC1), member 8a (predicted), Abca8a_predicted | -227.9                                            | -24.0                              |
| 1390601_at       | Transcribed locus, ---                                                             | -221.6                                            | -45.4                              |
| 1392077_at       | putative C11orf8 homolog (human), C11orf8h                                         | -168.7                                            | -1.6                               |
| 1396933_s_at     | aldo-keto reductase family 1, member C14, Akr1c14                                  | -96.3                                             | 8.4                                |
| 1370708_a_at     | aldo-keto reductase family 1, member C14, Akr1c14                                  | -89.3                                             | 2.1                                |
| 1377086_at       | C1q and tumor necrosis factor related protein 3 (predicted), C1qtnf3_predicted     | -78.1                                             | -1.4                               |
| 1391520_at       | Transcribed locus, ---                                                             | -67.5                                             | -6.7                               |
| 1389284_at       | Transcribed locus, ---                                                             | -43.3                                             | 2.8                                |
| 1387922_at       | cysteine-rich secretory protein LCCL domain containing 2, Crispld2                 | -42.2                                             | -2.6                               |
| 1376799_a_at     | cytokine receptor-like factor 1 (predicted), Crf1_predicted                        | -41.2                                             | -2.3                               |
| 1370563_at       | aldo-keto reductase family 1, member C14, Akr1c14                                  | -31.0                                             | -2.8                               |
| 1376457_at       | cysteine-rich secretory protein LCCL domain containing 2, Crispld2                 | -28.5                                             | -6.5                               |
| 1387197_at       | osteomodulin, Omd                                                                  | -24.9                                             | -2.8                               |
| 1379184_at       | Transcribed locus, ---                                                             | -24.6                                             | -5.5                               |
| 1368868_at       | A kinase (PRKA) anchor protein (gravin) 12, Akap12                                 | -23.4                                             | 1.6                                |
| 1387879_a_at     | CUG triplet repeat, RNA binding protein 2, Cugbp2                                  | -23.1                                             | -2.1                               |
| 1375303_at       | LIM domain binding 3, Ldb3                                                         | -21.7                                             | -6.3                               |
| 1370847_at       | spondin 2, extracellular matrix protein, Spon2                                     | -18.9                                             | -1.9                               |
| 1370019_at       | sulfotransferase family 1A, phenol-preferring, member 1, Sult1a1                   | -17.1                                             | -6.6                               |
| 1374089_at       | Transcribed locus, ---                                                             | -15.5                                             | -3.3                               |
| 1385248_a_at     | osteoglycin, Ogn                                                                   | -14.6                                             | -1.7                               |
| 1370282_at       | cysteine and glycine-rich protein 2, Csrp2                                         | -14.6                                             | -1.7                               |
| 1384080_at       | Transcribed locus, ---                                                             | -14.4                                             | -1.3                               |
| 1392295_a_at     | Transcribed locus, ---                                                             | -14.4                                             | 1.1                                |
| 1394874_at       | similar to Dermal papilla derived protein 7 (predicted), RGD1310935_predicted      | -13.5                                             | -1.7                               |
| 1376789_at       | Transcribed locus, ---                                                             | -12.9                                             | -1.5                               |
| 1393452_at       | carbonic anhydrase 9 (predicted), Car9_predicted                                   | -12.7                                             | -1.1                               |

|              |                                                                                                |       |       |
|--------------|------------------------------------------------------------------------------------------------|-------|-------|
| 1397335_at   | sema domain, immunoglobulin domain (Ig), short basic domain, secreted, (semaphorin) 3D, Sema3d | -12.2 | -1.5  |
| 1376632_at   | LIM and cysteine-rich domains 1 (predicted), Lmcd1_predicted                                   | -12.0 | -1.9  |
| 1394740_at   | ---                                                                                            | -11.9 | -1.8  |
| 1395052_at   | Transcribed locus, ---                                                                         | -11.5 | -4.1  |
| 1383263_at   | osteoglycin, Ogn                                                                               | -11.5 | -1.8  |
| 1390450_a_at | osteoglycin, Ogn                                                                               | -11.2 | -1.9  |
| 1388152_at   | microtubule-associated protein 2, Mtap2                                                        | -11.0 | 1.4   |
| 1385098_at   | Transcribed locus, ---                                                                         | -10.8 | -1.8  |
| 1376165_at   | Solute carrier family 24 (sodium/potassium/calcium exchanger), member 3, Slc24a3               | -10.5 | -2.5  |
| 1372280_at   | ankyrin repeat and SOCS box-containing protein 2, Asb2                                         | -10.2 | -4.4  |
| 1393109_at   | CDNA clone IMAGE:7302574, ---                                                                  | -10.1 | -2.0  |
| 1376749_at   | osteoglycin, Ogn                                                                               | -9.9  | -1.9  |
| 1378970_at   | Similar to Myosin-binding protein H (MyBP-H) (H-protein), RGD1310511                           | -9.7  | -2.7  |
| 1370703_at   | MAS-related GPR, member F, Mrgprf                                                              | -9.6  | -7.1  |
| 1372727_at   | Transcribed locus, ---                                                                         | -9.5  | -1.1  |
| 1394736_at   | popeye domain containing 2, Popdc2                                                             | -9.4  | -3.2  |
| 1379452_at   | growth arrest-specific 2, Gas2                                                                 | -9.3  | 1.1   |
| 1387439_at   | multiple EGF-like-domains 6, Megf6                                                             | -9.3  | -4.4  |
| 1368375_a_at | interleukin 15, Il15                                                                           | -9.2  | -2.1  |
| 1373110_at   | Transcribed locus, ---                                                                         | -8.8  | -1.3  |
| 1376410_at   | matrix metalloproteinase 17 (predicted), Mmp17_predicted                                       | -8.7  | -1.3  |
| 1394394_at   | Transcribed locus, ---                                                                         | -8.6  | -1.8  |
| 1380236_at   | similar to integrin alpha 9, LOC685004                                                         | -8.5  | -4.3  |
| 1394570_at   | Kell blood group precursor (McLeod phenotype) homolog, Xk                                      | -8.5  | 1.1   |
| 1382072_at   | olfactomedin-like 2A (predicted), Olfml2a_predicted                                            | -8.5  | -10.6 |
| 1379497_at   | ---                                                                                            | -8.4  | -3.3  |
| 1370135_at   | met proto-oncogene, Cav2                                                                       | -8.3  | 1.0   |
| 1369773_at   | bone morphogenetic protein 3, Bmp3                                                             | -8.3  | -2.6  |
| 1368900_at   | thrombomodulin, Thbd                                                                           | -8.2  | 1.6   |
| 1376806_at   | Transcribed locus, ---                                                                         | -7.9  | 1.2   |
| 1389236_at   | myosin binding protein H-like, Mybphl                                                          | -7.9  | -3.5  |
| 1398345_at   | Transcribed locus, ---                                                                         | -7.8  | 1.3   |
| 1392963_at   | secernin 1, Scrn1                                                                              | -7.8  | 1.3   |
| 1389198_at   | SH2 domain containing 3C (predicted),                                                          | -7.8  | -2.5  |

|              |                                                                                                                |      |      |
|--------------|----------------------------------------------------------------------------------------------------------------|------|------|
|              | Sh2d3c_predicted                                                                                               |      |      |
| 1395512_at   | cytokine receptor-like factor 1 (predicted), Crlf1_predicted                                                   | -7.4 | -1.5 |
| 1387803_at   | protein phosphatase 2 (formerly 2A), regulatory subunit B (PR 52), beta isoform, Ppp2r2b                       | -7.3 | 1.7  |
| 1398406_at   | Transcribed locus, ---                                                                                         | -7.2 | 1.4  |
| 1374241_at   | Transcribed locus, ---                                                                                         | -7.1 | -1.1 |
| 1377058_at   | solute carrier family 37 (glycerol-3-phosphate transporter), member 2, Slc37a2                                 | -7.0 | 1.2  |
| 1392221_at   | Transcribed locus, ---                                                                                         | -6.8 | -1.6 |
| 1388145_at   | tenascin XA, Tnxa                                                                                              | -6.8 | -1.5 |
| 1371984_at   | Transcribed locus, ---                                                                                         | -6.6 | -3.9 |
| 1394456_at   | Transcribed locus, ---                                                                                         | -6.5 | -1.1 |
| 1376172_at   | ATP-binding cassette, sub-family G (WHITE), member 4, Abcg4                                                    | -6.5 | -4.3 |
| 1377736_at   | Transcribed locus, ---                                                                                         | -6.5 | -1.1 |
| 1372449_at   | Transcribed locus, ---                                                                                         | -6.5 | 1.3  |
| 1368869_at   | A kinase (PRKA) anchor protein (gravin) 12, Akap12                                                             | -6.4 | 1.4  |
| 1377789_at   | Transcribed locus, ---                                                                                         | -6.3 | -1.5 |
| 1369443_at   | angiopoietin-like 2, Angptl2                                                                                   | -6.3 | 1.5  |
| 1368989_at   | tissue inhibitor of metalloproteinase 3, Timp3                                                                 | -6.3 | -1.2 |
| 1378457_at   | Transcribed locus, ---                                                                                         | -6.2 | -1.2 |
| 1394681_at   | aldo-keto reductase family 1, member C-like 1 (predicted), Akr1cl1_predicted                                   | -6.2 | -1.4 |
| 1375638_at   | serum deprivation response, Sdpr                                                                               | -6.2 | -1.4 |
| 1393943_at   | Matrilin 3 (predicted), Matn3_predicted                                                                        | -6.1 | -1.5 |
| 1373093_at   | ERBB receptor feedback inhibitor 1, Errfi1                                                                     | -6.1 | 1.8  |
| 1368700_at   | phospholipase C-like 1, Plcl1                                                                                  | -6.1 | -1.3 |
| 1379117_at   | Transcribed locus, ---                                                                                         | -6.0 | 1.0  |
| 1392274_at   | Transcribed locus, ---                                                                                         | -6.0 | 3.1  |
| 1391563_at   | melanoma associated antigen (mutated) 1-like 1, Mum1l1                                                         | -6.0 | -1.5 |
| 1382452_at   | serum deprivation response, Sdpr                                                                               | -5.9 | -1.2 |
| 1368901_at   | thrombomodulin, Thbd                                                                                           | -5.9 | -1.1 |
| 1370630_a_at | fibroblast growth factor receptor 2, Fgfr2                                                                     | -5.9 | -3.6 |
| 1390523_at   | Transcribed locus, ---                                                                                         | -5.8 | -1.8 |
| 1382439_at   | integrin, beta 6, Itgb6                                                                                        | -5.8 | -2.1 |
| 1389720_at   | Transcribed locus, strongly similar to XP_001069291.1 PREDICTED: hypothetical protein [Rattus norvegicus], --- | -5.7 | -2.1 |
| 1367592_at   | troponin T2, cardiac, Tnnt2                                                                                    | -5.7 | -1.4 |
| 1385125_at   | transcription factor myocardin, Myocd                                                                          | -5.7 | -1.7 |
| 1374574_at   | similar to hypothetical protein MGC38960                                                                       | -5.6 | -1.5 |

|              |                                                                                                                |      |       |
|--------------|----------------------------------------------------------------------------------------------------------------|------|-------|
| 1386615_at   | (predicted), RGD1310552_predicted<br>carbohydrate sulfotransferase 2 (predicted),<br>Chst2_predicted           | -5.6 | -1.5  |
| 1382351_at   | GTP binding protein (gene overexpressed in<br>skeletal muscle) (predicted), Gem_predicted                      | -5.6 | 1.1   |
| 1369968_at   | pleiotrophin, Ptn                                                                                              | -5.5 | 1.3   |
| 1374383_at   | Transcribed locus, ---                                                                                         | -5.4 | -1.9  |
| 1379493_at   | Transcribed locus, ---                                                                                         | -5.4 | -1.8  |
| 1398476_at   | vinculin (predicted), Vcl_predicted                                                                            | -5.4 | -2.0  |
| 1383280_at   | Transcribed locus, ---                                                                                         | -5.3 | -1.8  |
| 1379300_at   | carbohydrate sulfotransferase 2 (predicted),<br>Chst2_predicted                                                | -5.3 | -1.8  |
| 1395816_at   | family with sequence similarity 13, member C1,<br>Fam13c1                                                      | -5.3 | -6.4  |
| 1375982_at   | Transcribed locus, strongly similar to<br>NP_001034162.1 LIM domain binding 3<br>isoform d [Mus musculus], --- | -5.3 | -20.4 |
| 1387025_at   | dynein cytoplasmic 1 intermediate chain 1,<br>Dync1i1                                                          | -5.2 | 1.2   |
| 1392637_at   | Transcribed locus, ---                                                                                         | -5.2 | 1.1   |
| 1383240_at   | Transcribed locus, ---                                                                                         | -5.2 | 1.1   |
| 1384515_at   | Hairy/enhancer-of-split related with YRPW<br>motif 2, Hey2                                                     | -5.2 | -1.6  |
| 1388945_at   | similar to 1300014I06Rik protein, RGD1311307                                                                   | -5.1 | -1.0  |
| 1370048_at   | endothelial differentiation, lysophosphatidic<br>acid G-protein-coupled receptor, 2, Edg2                      | -5.1 | -1.3  |
| 1379444_at   | Transcribed locus, ---                                                                                         | -5.1 | -1.1  |
| 1369783_a_at | neuregulin 1, Nrg1                                                                                             | -5.0 | 2.3   |
| 1375959_at   | Transcribed locus, ---                                                                                         | -5.0 | -2.7  |
| 1374943_at   | similar to RIKEN cDNA 2010011I20 (predicted),<br>RGD1311378_predicted                                          | -4.9 | -1.4  |
| 1374591_at   | similar to protein tyrosine phosphatase,<br>receptor type, D (predicted),<br>RGD1561090_predicted              | -4.9 | -1.6  |
| 1368105_at   | tetraspanin 2, Tspan2                                                                                          | -4.9 | -1.8  |
| 1375951_at   | thrombomodulin, Thbd                                                                                           | -4.9 | -1.2  |
| 1393015_at   | similar to hypothetical protein FLJ14146,<br>RGD1310587                                                        | -4.8 | -3.6  |
| 1370023_at   | gap junction membrane channel protein alpha<br>4, Gja4                                                         | -4.8 | 2.0   |
| 1379073_at   | solute carrier family 25 (mitochondrial carrier;<br>phosphate carrier), member 23, Slc25a23                    | -4.8 | -2.8  |
| 1394797_at   | Transcribed locus, ---                                                                                         | -4.8 | -2.1  |
| 1387814_at   | caveolin 3, Cav3                                                                                               | -4.7 | -1.9  |
| 1373992_at   | similar to interferon-inducible GTPase,                                                                        | -4.6 | 1.5   |

|              | MGC108823                                                                                    |      |      |
|--------------|----------------------------------------------------------------------------------------------|------|------|
| 1371485_at   | Transcribed locus, ---                                                                       | -4.6 | -1.4 |
| 1367857_at   | fatty acid desaturase 1, Fads1                                                               | -4.6 | 1.8  |
| 1377751_at   | Transcribed locus, ---                                                                       | -4.5 | -2.1 |
| 1367673_at   | selenium binding protein 1, Selenbp1                                                         | -4.5 | -1.5 |
| 1398597_at   | Transcribed locus, ---                                                                       | -4.5 | 2.1  |
| 1378094_at   | Transcribed locus, ---                                                                       | -4.5 | 1.0  |
| 1388667_at   | ---                                                                                          | -4.5 | 1.1  |
| 1382726_at   | Transcribed locus, ---                                                                       | -4.4 | 1.8  |
| 1385815_at   | aortic preferentially expressed gene 1                                                       | -4.4 | -2.4 |
| 1389306_at   | matrilin 2 (predicted), Matn2_predicted                                                      | -4.4 | -1.7 |
| 1389836_a_at | Tissue inhibitor of metalloproteinase 3 (Sorsby fundus dystrophy, pseudoinflammatory), Timp3 | -4.4 | -1.2 |
| 1380312_at   | Transcribed locus, ---                                                                       | -4.4 | -1.5 |
| 1389867_at   | Transcribed locus, ---                                                                       | -4.4 | -1.6 |
| 1368001_at   | aortic preferentially expressed gene 1, Apeg1                                                | -4.3 | -2.5 |
| 1372296_at   | SH3-binding domain glutamic acid-rich protein, Sh3bgr                                        | -4.3 | -4.2 |
| 1367859_at   | transforming growth factor, beta 3, Tgfb3                                                    | -4.3 | -1.9 |
| 1394727_at   | Transcribed locus, ---                                                                       | -4.3 | -2.9 |
| 1368513_at   | glutamyl aminopeptidase, Enpep                                                               | -4.3 | -1.4 |
| 1381576_at   | phosphoinositide-3-kinase, class 2, beta polypeptide (predicted), Pik3c2b_predicted          | -4.3 | -1.0 |
| 1370310_at   | 3-hydroxy-3-methylglutaryl-Coenzyme A synthase 2, Hmgcs2                                     | -4.3 | 3.5  |
| 1370328_at   | dickkopf homolog 3 (Xenopus laevis), Dkk3                                                    | -4.3 | -1.1 |
| 1371241_x_at | Tropomyosin 1, alpha, Tpm1                                                                   | -4.3 | -1.5 |
| 1391063_at   | kinesin family member 23 (predicted), Kif23_predicted                                        | -4.3 | 2.0  |
| 1375230_at   | Endogenous retrovirus mRNA, partial sequence, ---                                            | -4.2 | -1.3 |
| 1368059_at   | crystallin, mu, Crym                                                                         | -4.2 | 1.1  |
| 1372297_at   | glutathione S-transferase, alpha 4, Gsta4                                                    | -4.2 | 1.1  |
| 1374269_at   | Transcribed locus, ---                                                                       | -4.1 | -2.4 |
| 1377642_at   | caveolin 2, Cav2                                                                             | -4.1 | 1.1  |
| 1387293_at   | zona pellucida glycoprotein 2, Zp2                                                           | -4.1 | -1.3 |
| 1376619_at   | similar to protein tyrosine phosphatase, receptor type, D (predicted), RGD1561090_predicted  | -4.1 | -1.6 |
| 1392973_at   | Transcribed locus, ---                                                                       | -4.1 | -1.2 |
| 1373232_at   | CDNA clone MGC:187847 IMAGE:9036094, ---                                                     | -4.1 | 1.2  |
| 1370131_at   | met proto-oncogene , Cav1                                                                    | -4.1 | -1.1 |
| 1389514_at   | leucine rich repeat and Ig domain containing 1, Lingo1                                       | -4.1 | -1.2 |

|              |                                                                                                                             |      |       |
|--------------|-----------------------------------------------------------------------------------------------------------------------------|------|-------|
| 1376082_at   | ecotropic viral integration site 1 (predicted), Evi1_predicted                                                              | -4.0 | -1.0  |
| 1381504_at   | asporin, Aspn                                                                                                               | -4.0 | -1.1  |
| 1373693_at   | G protein-coupled receptor, family C, group 5, member C, Gprc5c                                                             | -4.0 | -1.6  |
| 1376076_at   | ---                                                                                                                         | -4.0 | 1.1   |
| 1374016_at   | endothelial differentiation, lysophosphatidic acid G-protein-coupled receptor, 2, Edg2                                      | -4.0 | -1.1  |
| 1382444_at   | Transcribed locus, ---                                                                                                      | -4.0 | 1.1   |
| 1371394_x_at | ---                                                                                                                         | -4.0 | -1.4  |
| 1371696_at   | G protein-coupled receptor 56, Gpr56                                                                                        | -4.0 | 1.2   |
| 1382802_x_at | ---                                                                                                                         | -4.0 | -1.7  |
| 1374171_at   | Transcribed locus, ---                                                                                                      | -3.9 | -1.5  |
| 1380726_at   | Similar to asporin precursor, LOC306805                                                                                     | -3.9 | 1.2   |
| 1390126_at   | ---                                                                                                                         | -3.9 | 1.5   |
| 1377695_at   | smoothelin-like 2, Smtnl2                                                                                                   | -3.9 | -12.8 |
| 1393860_at   | Transcribed locus, ---                                                                                                      | -3.8 | 1.3   |
| 1368343_at   | potassium voltage-gated channel, subfamily H (eag-related), member 2, Kcnh2                                                 | -3.8 | -1.9  |
| 1369625_at   | aquaporin 1, Aqp1                                                                                                           | -3.8 | 3.2   |
| 1392074_at   | similar to hypothetical protein FLJ21986, LOC500046                                                                         | -3.8 | -2.5  |
| 1389698_at   | Transcribed locus, ---                                                                                                      | -3.8 | -1.5  |
| 1384617_at   | hypothetical LOC310540, MGC72614                                                                                            | -3.8 | -1.0  |
| 1378006_at   | Transcribed locus, ---                                                                                                      | -3.8 | 1.0   |
| 1376997_at   | Transcribed locus, ---                                                                                                      | -3.7 | 1.3   |
| 1380126_at   | Transcribed locus, ---                                                                                                      | -3.7 | -2.7  |
| 1392627_x_at | Endogenous retrovirus mRNA, partial sequence, ---                                                                           | -3.7 | -1.4  |
| 1380197_at   | Transcribed locus, ---                                                                                                      | -3.7 | -2.5  |
| 1393352_at   | similar to hypothetical protein MGC38960 (predicted), RGD1310552_predicted                                                  | -3.7 | -1.4  |
| 1378183_at   | Transcribed locus, ---                                                                                                      | -3.7 | 1.2   |
| 1371518_at   | Nidogen 1, Nid1                                                                                                             | -3.6 | -1.7  |
| 1383696_at   | protein tyrosine phosphatase-like (proline instead of catalytic arginine), member a, Ptpla                                  | -3.6 | -1.0  |
| 1383074_at   | mannosidase 2, alpha 1, Man2a1                                                                                              | -3.6 | 1.3   |
| 1372226_at   | Transcribed locus, strongly similar to NP_001028289.1 SLIT-ROBO Rho GTPase activating protein 3 isoform b [Homo sapiens], - | -3.6 | -1.6  |
|              | --                                                                                                                          |      |       |
| 1372598_at   | similar to 1190005I06Rik protein (predicted), RGD1309651_predicted                                                          | -3.6 | -3.2  |
| 1387658_at   | eukaryotic elongation factor-2 kinase, Eef2k                                                                                | -3.6 | -1.2  |



|              |                                                                                                         |      |      |
|--------------|---------------------------------------------------------------------------------------------------------|------|------|
| 1369329_at   | Notch gene homolog 3 (Drosophila), Notch3                                                               | -3.6 | -2.1 |
| 1381434_s_at | CDNA clone MGC:187847 IMAGE:9036094, ---                                                                | -3.6 | 1.2  |
| 1379157_at   | Transcribed locus, ---                                                                                  | -3.6 | -1.4 |
| 1394101_at   | Transcribed locus, ---                                                                                  | -3.6 | -1.6 |
| 1390681_at   | Transcribed locus, ---                                                                                  | -3.5 | 1.0  |
| 1393196_at   | kelch-like 23 (Drosophila) (predicted), Khl23_predicted                                                 | -3.5 | -1.3 |
| 1368133_at   | multiple PDZ domain protein, Mpdz                                                                       | -3.5 | -1.0 |
| 1367816_at   | HOP homeobox, Hopx                                                                                      | -3.5 | 1.4  |
| 1388456_at   | S100 calcium binding protein A1, S100a1                                                                 | -3.5 | -2.2 |
| 1387137_at   | cartilage oligomeric matrix protein, Comp                                                               | -3.5 | -2.7 |
| 1375138_at   | tissue inhibitor of metalloproteinase 3, Timp3                                                          | -3.5 | -1.0 |
| 1390800_a_at | met proto-oncogene, Cav2                                                                                | -3.5 | 1.8  |
| 1392315_at   | Transcribed locus, ---                                                                                  | -3.5 | -1.8 |
| 1389112_at   | naked cuticle 1 homolog (Drosophila) (predicted), Nkd1_predicted                                        | -3.5 | -2.0 |
| 1376989_at   | Transcribed locus, ---                                                                                  | -3.5 | -1.8 |
| 1377375_at   | aminoadipate-semialdehyde synthase (predicted), Aass_predicted                                          | -3.4 | -1.1 |
| 1374910_at   | cadherin EGF LAG seven-pass G-type receptor 2, Celsr2                                                   | -3.4 | -1.5 |
| 1388994_at   | Transcribed locus, ---                                                                                  | -3.4 | 1.3  |
| 1385876_at   | ---                                                                                                     | -3.4 | -1.6 |
| 1373592_at   | serine (or cysteine) peptidase inhibitor, clade B, member 9, Serpinb9                                   | -3.4 | -1.2 |
| 1383721_at   | frizzled homolog 8 (Drosophila), Fzd8                                                                   | -3.4 | -1.2 |
| 1393129_at   | procollagen-proline, 2-oxoglutarate 4-dioxygenase (proline 4-hydroxylase), alpha polypeptide III, P4ha3 | -3.4 | -1.7 |
| 1387737_at   | methionine adenosyltransferase II, alpha, Mat2a                                                         | -3.4 | 1.4  |
| 1390051_at   | similar to mKIAA0774 protein (predicted), RGD1562533_predicted                                          | -3.4 | -2.0 |
| 1388539_at   | plakophilin 2, Pkp2                                                                                     | -3.4 | -1.1 |
| 1386333_at   | Transcribed locus, ---                                                                                  | -3.4 | -2.6 |
| 1380064_at   | Transcribed locus, ---                                                                                  | -3.3 | -1.2 |
| 1397634_at   | ankyrin repeat and SAM domain containing 1 (predicted), Anks1_predicted                                 | -3.3 | 1.1  |
| 1372381_at   | Transcribed locus, ---                                                                                  | -3.3 | -1.3 |
| 1387130_at   | solute carrier family 39 (iron-regulated transporter), member 1, Slc40a1                                | -3.3 | -1.8 |
| 1382659_at   | phospholipase A2 receptor 1 (predicted), Pla2r1_predicted                                               | -3.3 | -2.6 |
| 1389990_at   | ---                                                                                                     | -3.3 | -1.3 |
| 1391481_at   | ---                                                                                                     | -3.3 | -1.1 |

|              |                                                                                                                   |      |      |
|--------------|-------------------------------------------------------------------------------------------------------------------|------|------|
| 1388453_at   | myeloid-associated differentiation marker, Myadm                                                                  | -3.3 | -1.1 |
| 1384834_at   | cordon-bleu (predicted), Cobl_predicted                                                                           | -3.3 | -1.6 |
| 1390828_at   | neuropeptide Y receptor Y1, Npy1r                                                                                 | -3.3 | -7.5 |
| 1383947_at   | ---                                                                                                               | -3.3 | -1.7 |
| 1384827_at   | polymerase (DNA directed), mu, Polm                                                                               | -3.3 | -1.4 |
| 1384276_at   | similar to procollagen, type IV, alpha 6, LOC363458                                                               | -3.3 | -1.3 |
| 1373776_at   | ---                                                                                                               | -3.3 | 1.1  |
| 1380831_at   | Transcribed locus, ---                                                                                            | -3.2 | 3.1  |
| 1372926_at   | Tissue inhibitor of metalloproteinase 3 (Sorsby fundus dystrophy, pseudoinflammatory), Timp3                      | -3.2 | -1.0 |
| 1391290_at   | Transcribed locus, ---                                                                                            | -3.2 | -1.7 |
| 1389779_at   | SH2 domain containing 4A, Sh2d4a                                                                                  | -3.2 | -1.3 |
| 1382017_at   | Transcribed locus, moderately similar to XP_995952.1 PREDICTED: hypothetical protein LOC72575 [Mus musculus], --- | -3.2 | 1.3  |
| 1380838_at   | Transcribed locus, ---                                                                                            | -3.2 | -2.1 |
| 1372332_at   | Transcribed locus, ---                                                                                            | -3.2 | 1.2  |
| 1387232_at   | bone morphogenetic protein 4, Bmp4                                                                                | -3.2 | -1.6 |
| 1367929_at   | CD59 antigen, Cd59                                                                                                | -3.2 | -1.8 |
| 1391862_at   | Transcribed locus, ---                                                                                            | -3.2 | -1.9 |
| 1374144_at   | Transcribed locus, ---                                                                                            | -3.2 | -1.1 |
| 1392953_at   | protein tyrosine phosphatase-like (proline instead of catalytic arginine), member a, Ptpla                        | -3.2 | -1.3 |
| 1375767_at   | pleckstrin homology domain containing, family G (with RhoGef domain) member 3, Plekhg3                            | -3.2 | -1.0 |
| 1393264_at   | similar to 9630058J23Rik protein (predicted), RGD1564833_predicted                                                | -3.2 | -1.3 |
| 1369097_s_at | guanylate cyclase 1, soluble, beta 3, Gucy1b3                                                                     | -3.2 | 1.2  |
| 1374771_at   | ---                                                                                                               | -3.2 | 1.1  |
| 1378400_at   | family with sequence similarity 122B, Fam122b                                                                     | -3.1 | 1.2  |
| 1368114_at   | fibroblast growth factor 13, Fgf13                                                                                | -3.1 | -1.4 |
| 1392597_at   | similar to ionized calcium binding adapter molecule 2 (Iba2) (predicted), RGD1305081_predicted                    | -3.1 | -1.5 |
| 1379440_at   | follistatin-like 3, Fstl3                                                                                         | -3.1 | -1.5 |
| 1397348_at   | Transcribed locus, ---                                                                                            | -3.1 | -1.7 |
| 1388916_at   | Transcribed locus, ---                                                                                            | -3.1 | -1.9 |
| 1393492_at   | Transcribed locus, ---                                                                                            | -3.1 | -1.8 |
| 1373672_at   | Similar to SPI6, MGC94010                                                                                         | -3.1 | -1.2 |
| 1380057_at   | Transcribed locus, ---                                                                                            | -3.1 | 1.2  |
| 1378746_at   | ---                                                                                                               | -3.1 | -1.1 |
| 1379724_at   | pleckstrin homology-like domain, family B,                                                                        | -3.1 | -1.2 |

|              |                                                                             |      |      |
|--------------|-----------------------------------------------------------------------------|------|------|
|              | member 2, Phldb2                                                            |      |      |
| 1370120_at   | follistatin-like 3, Fstl3                                                   | -3.1 | -1.6 |
| 1382482_at   | Transcribed locus, ---                                                      | -3.0 | -1.0 |
| 1386805_at   | similar to TPR repeat-containing protein<br>KIAA1043, LOC304558             | -3.0 | -2.8 |
| 1374208_at   | zinc finger CCCH type containing 7 A<br>(predicted), Zc3h7a_predicted       | -3.0 | 1.2  |
| 1375367_at   | PDZ and LIM domain 2, Pdlim2                                                | -3.0 | -1.9 |
| 1370264_at   | spectrin repeat containing, nuclear envelope 1,<br>Syne1                    | -3.0 | -1.8 |
| 1371350_at   | methionine adenosyltransferase II, alpha,<br>Mat2a                          | -3.0 | 1.3  |
| 1371679_at   | synaptopodin 2, Synpo2                                                      | -3.0 | -1.1 |
| 1372820_at   | Transcribed locus, ---                                                      | -3.0 | -1.6 |
| 1398387_at   | hypothetical LOC310540, MGC72614                                            | -3.0 | 1.0  |
| 1396071_at   | Transcribed locus, ---                                                      | -3.0 | -1.8 |
| 1382422_at   | Protocadherin 7, Pcdh7                                                      | -3.0 | -1.8 |
| 1369638_at   | eukaryotic elongation factor-2 kinase, Eef2k                                | -3.0 | -1.6 |
| 1378490_at   | Transcribed locus, ---                                                      | -3.0 | -1.8 |
| 1367604_at   | cysteine-rich protein 2, Crip2                                              | -3.0 | 1.1  |
| 1384160_at   | synaptopodin 2, Synpo2                                                      | -3.0 | 1.1  |
| 1383402_at   | Transcribed locus, ---                                                      | -3.0 | -1.5 |
| 1386145_at   | Transcribed locus, ---                                                      | -3.0 | -1.1 |
| 1391537_at   | SERTA domain containing 4, Sertad4                                          | -3.0 | -1.3 |
| 1373000_at   | sushi-repeat-containing protein, X-linked 2<br>(predicted), SrpX2_predicted | -2.9 | -1.4 |
| 1370988_at   | ---                                                                         | -2.9 | -2.2 |
| 1383628_at   | Transcribed locus, ---                                                      | -2.9 | -1.3 |
| 1376584_at   | protein phosphatase 1 (formerly 2C)-like<br>(predicted), Ppm1l_predicted    | -2.9 | -1.0 |
| 1368724_a_at | tropomyosin 1, alpha, Tpm1                                                  | -2.9 | -1.8 |
| 1384380_at   | Transcribed locus, ---                                                      | -2.9 | -1.5 |
| 1377950_at   | similar to interferon-inducible GTPase,<br>RGD1309362                       | -2.9 | -1.1 |
| 1371139_at   | plastin 3 (T-isoform), Pls3                                                 | -2.8 | -1.4 |
| 1382591_at   | Transcribed locus, ---                                                      | -2.8 | 1.4  |
| 1388195_at   | CUG triplet repeat, RNA binding protein 2,<br>Cugbp2                        | -2.8 | -1.7 |
| 1377795_at   | Transcribed locus, ---                                                      | -2.8 | -1.9 |
| 1396085_at   | filamin C, gamma (actin binding protein 280)<br>(predicted), Flnc_predicted | -2.8 | -1.6 |
| 1384062_at   | Transcribed locus, ---                                                      | -2.8 | -1.2 |
| 1385314_at   | Transcribed locus, ---                                                      | -2.8 | 1.4  |
| 1370940_at   | tight junction protein 2, Tjp2                                              | -2.8 | 1.3  |

|            |                                                                                                                                      |      |      |
|------------|--------------------------------------------------------------------------------------------------------------------------------------|------|------|
| 1388874_at | metastasis suppressor 1 (predicted),<br>Mtss1_predicted                                                                              | -2.8 | -1.2 |
| 1385564_at | LIM domain containing preferred translocation<br>partner in lipoma, Lpp                                                              | -2.8 | -1.9 |
| 1389150_at | Transcribed locus, ---                                                                                                               | -2.8 | -1.9 |
| 1369960_at | FXVD domain-containing ion transport<br>regulator 1, Fxyd1                                                                           | -2.8 | -1.8 |
| 1374691_at | sulfotransferase family 5A, member 1<br>(predicted), Sult5a1_predicted                                                               | -2.8 | -1.4 |
| 1396539_at | Transcribed locus, ---                                                                                                               | -2.8 | -1.4 |
| 1386960_at | solute carrier family 37 (glucose-6-phosphate<br>transporter), member 4, Slc37a4                                                     | -2.8 | 1.3  |
| 1374389_at | guanylate cyclase 1, soluble, beta 3, Gucy1b3                                                                                        | -2.7 | 1.4  |
| 1387907_at | inositol 1,4,5-triphosphate receptor 1, Itpr1                                                                                        | -2.7 | -1.3 |
| 1393281_at | met proto-oncogene, Cav1                                                                                                             | -2.7 | 1.1  |
| 1380100_at | Similar to Traf2 and NCK interacting kinase,<br>splice variant 4 (predicted),<br>RGD1561817_predicted                                | -2.7 | 2.3  |
| 1389680_at | elongation factor RNA polymerase II 2, EIf2                                                                                          | -2.7 | 1.3  |
| 1393170_at | similar to homeobox-containing transcription<br>factor (predicted), RGD1561431_predicted                                             | -2.7 | -1.3 |
| 1384308_at | similar to myeloid ecotropic viral integration site<br>1, LOC686117                                                                  | -2.7 | -1.3 |
| 1389199_at | CDNA clone IMAGE:7321132, ---                                                                                                        | -2.7 | 1.1  |
| 1383697_at | Transcribed locus, ---                                                                                                               | -2.7 | 1.3  |
| 1373998_at | Transcribed locus, ---                                                                                                               | -2.7 | -1.6 |
| 1398484_at | similar to TBC1 domain family, member 8 (with<br>GRAM domain); vascular Rab-GAP/TBC-<br>containing (predicted), RGD1308221_predicted | -2.7 | 1.2  |
| 1374028_at | similar to CDNA sequence BC024479,<br>LOC500974                                                                                      | -2.7 | 1.1  |
| 1388889_at | endoplasmic reticulum metalloproteinase 1,<br>Ermp1                                                                                  | -2.7 | -1.1 |
| 1397866_at | serine (or cysteine) peptidase inhibitor, clade B,<br>member 6b, Serpinb6b                                                           | -2.7 | -1.6 |
| 1376138_at | ---                                                                                                                                  | -2.7 | -1.7 |
| 1370452_at | calcium channel, voltage-dependent, L type,<br>alpha 1C subunit, Cacna1c                                                             | -2.7 | -1.8 |
| 1386577_at | kelch-like 23 (Drosophila) (predicted),<br>Klhl23_predicted                                                                          | -2.7 | -1.5 |
| 1393653_at | Transcribed locus, ---                                                                                                               | -2.7 | -1.5 |
| 1398398_at | homeo box A10, Hoxa10                                                                                                                | -2.7 | -2.0 |
| 1378777_at | Transcribed locus, ---                                                                                                               | -2.7 | -1.8 |
| 1371692_at | myeloid/lymphoid or mixed-lineage leukemia<br>(trithorax homolog, Drosophila); translocated to,                                      | -2.7 | 1.0  |

|              |                                                                                                       |      |      |
|--------------|-------------------------------------------------------------------------------------------------------|------|------|
|              | 11, Mllt11                                                                                            |      |      |
| 1386296_at   | septin 8 (predicted), Sept8_predicted                                                                 | -2.7 | -2.0 |
| 1376089_at   | Transcribed locus, ---                                                                                | -2.6 | 1.6  |
| 1373952_at   | protein kinase, AMP-activated, gamma 2 non-catalytic subunit, Prkag2                                  | -2.6 | -1.4 |
| 1390662_at   | tripartite motif-containing 24, Trim24                                                                | -2.6 | 1.5  |
| 1376554_at   | Transcribed locus, strongly similar to NP_780360.1 TatD DNase domain containing 1 [Mus musculus], --- | -2.6 | 1.0  |
| 1367970_at   | profilin 2, Pfn2                                                                                      | -2.6 | 2.0  |
| 1379382_at   | Transcribed locus, ---                                                                                | -2.6 | -1.0 |
| 1383593_at   | Transcribed locus, ---                                                                                | -2.6 | 1.0  |
| 1372180_at   | syndecan 3, Sdc3                                                                                      | -2.6 | -1.0 |
| 1379315_at   | Ras association (RalGDS/AF-6) domain family 7 (predicted), Rassf7_predicted                           | -2.6 | -2.5 |
| 1393415_at   | endothelin receptor type A, Ednra                                                                     | -2.6 | 2.1  |
| 1383576_at   | Transcribed locus, ---                                                                                | -2.6 | -1.8 |
| 1385171_s_at | smoothelin-like 2, Smtnl2                                                                             | -2.6 | -4.1 |
| 1383353_at   | Transcribed locus, ---                                                                                | -2.6 | -1.0 |
| 1377042_at   | polycomb group ring finger 5, Pcgf5                                                                   | -2.6 | -1.3 |
| 1392937_at   | cyclin I (predicted), Ccni_predicted                                                                  | -2.6 | -1.1 |
| 1376779_at   | forkhead box O1, Foxo1                                                                                | -2.6 | -1.3 |
| 1392083_at   | Similar to Ext1, LOC299907                                                                            | -2.6 | -1.4 |
| 1399113_at   | Transcribed locus, ---                                                                                | -2.6 | -1.1 |
| 1387673_a_at | annexin A6, Anxa6                                                                                     | -2.5 | -1.3 |
| 1370986_s_at | ---                                                                                                   | -2.5 | -1.5 |
| 1371855_at   | ---                                                                                                   | -2.5 | -1.9 |
| 1396736_at   | Transcribed locus, ---                                                                                | -2.5 | -1.2 |
| 1372905_at   | vinculin (predicted), Vcl_predicted                                                                   | -2.5 | -1.2 |
| 1381850_at   | protein phosphatase 1, regulatory (inhibitor) subunit 12A, Ppp1r12a                                   | -2.5 | -1.5 |
| 1371625_at   | brain glycogen phosphorylase, Pygb                                                                    | -2.5 | -1.4 |
| 1383362_at   | Transcribed locus, ---                                                                                | -2.5 | -1.3 |
| 1382201_at   | unc-5 homolog C (C. elegans), Unc5c                                                                   | -2.5 | 1.0  |
| 1383228_at   | ---                                                                                                   | -2.5 | -1.9 |
| 1373624_at   | Transcribed locus, ---                                                                                | -2.5 | -1.7 |
| 1383641_at   | endothelin receptor type A, Ednra                                                                     | -2.5 | 2.2  |
| 1394451_at   | annexin A1, Anxa1                                                                                     | -2.5 | -1.3 |
| 1376140_at   | ATP-binding cassette, sub-family D (ALD), member 1 (predicted), Abcd1_predicted                       | -2.5 | -1.4 |
| 1376200_at   | hypothetical LOC316976, MGC72974                                                                      | -2.5 | -1.7 |
| 1390145_at   | Transcribed locus, ---                                                                                | -2.5 | -1.1 |
| 1375026_at   | Similar to calmodulin-like 4, LOC691455                                                               | -2.5 | -1.3 |
| 1379934_at   | Transcribed locus, ---                                                                                | -2.5 | 1.4  |

|              |                                                                                                                             |      |      |
|--------------|-----------------------------------------------------------------------------------------------------------------------------|------|------|
| 1398866_at   | membrane associated guanylate kinase, WW and PDZ domain containing 3, Magi3                                                 | -2.5 | -1.0 |
| 1389096_at   | ---                                                                                                                         | -2.5 | -1.1 |
| 1375538_at   | Vinculin (predicted), Vcl_predicted                                                                                         | -2.4 | -1.5 |
| 1398294_at   | actinin, alpha 1, Actn1                                                                                                     | -2.4 | -1.5 |
| 1388185_at   | retinoblastoma 1, Rb1                                                                                                       | -2.4 | -1.9 |
| 1395525_at   | WW, C2 and coiled-coil domain containing 2, Wwc2                                                                            | -2.4 | -1.7 |
| 1388698_at   | extracellular matrix protein 1, Ecm1                                                                                        | -2.4 | -1.6 |
| 1377679_at   | G protein-coupled receptor 125 (predicted), Gpr125_predicted                                                                | -2.4 | -1.1 |
| 1372602_at   | starch binding domain 1, Stbd1                                                                                              | -2.4 | -1.4 |
| 1389656_at   | similar to Tetraspanin-15 (Tspan-15) (Transmembrane 4 superfamily member 15) (Tetraspan NET-7), LOC679462                   | -2.4 | -1.5 |
| 1388300_at   | microsomal glutathione S-transferase 3 (predicted), Mgst3_predicted                                                         | -2.4 | 1.6  |
| 1373642_at   | ---                                                                                                                         | -2.4 | -1.5 |
| 1378949_at   | endothelin-converting enzyme 2, Ece2                                                                                        | -2.4 | -1.8 |
| 1374767_at   | similar to hypothetical protein FLJ14675, RGD1309592                                                                        | -2.4 | 1.2  |
| 1371665_at   | SWI/SNF related, matrix associated, actin dependent regulator of chromatin, subfamily d, member 3, Smarcd3                  | -2.4 | -1.3 |
| 1387279_at   | F11 receptor, F11r                                                                                                          | -2.4 | -1.9 |
| 1373749_at   | syntrophin, acidic 1, Snta1                                                                                                 | -2.4 | -1.1 |
| 1377118_at   | similar to KIAA1712 protein, RGD1308517                                                                                     | -2.4 | -1.2 |
| 1384521_at   | Transcribed locus, ---                                                                                                      | -2.4 | -1.1 |
| 1373448_at   | acylphosphatase 1, erythrocyte (common) type (predicted), Acyp1_predicted                                                   | -2.4 | 1.6  |
| 1372048_at   | podocalyxin-like 2 (predicted), Podxl2_predicted                                                                            | -2.4 | -2.9 |
| 1375046_at   | NAC alpha domain containing, Nacad                                                                                          | -2.4 | -2.1 |
| 1383897_at   | H2A histone family, member Y2, H2afy2                                                                                       | -2.4 | 1.2  |
| 1376377_at   | diaphanous homolog 3 (Drosophila), Diap3                                                                                    | -2.4 | 1.1  |
| 1369953_a_at | CD24 antigen, Cd24                                                                                                          | -2.3 | 1.1  |
| 1384182_at   | pleckstrin homology domain containing, family C (with FERM domain) member 1, Plekhc1                                        | -2.3 | -1.7 |
| 1389281_at   | Transcribed locus, strongly similar to XP_001077488.1 PREDICTED: similar to ankyrin repeat domain 25 [Rattus norvegicus], - | -2.3 | -1.8 |
|              | --                                                                                                                          |      |      |
| 1390444_at   | Transcribed locus, ---                                                                                                      | -2.3 | -1.6 |
| 1386061_at   | coiled coil domain containing 88A, Ccdc88a                                                                                  | -2.3 | 1.3  |
| 1383025_at   | meningioma expressed antigen 5                                                                                              | -2.3 | -1.0 |

|              |                                                                                                                                                          |      |      |
|--------------|----------------------------------------------------------------------------------------------------------------------------------------------------------|------|------|
|              | (hyaluronidase), Mgea5                                                                                                                                   |      |      |
| 1368983_at   | heparin-binding EGF-like growth factor, Hbegf                                                                                                            | -2.3 | 2.8  |
| 1373363_at   | microtubule-associated protein 1b, Map1b                                                                                                                 | -2.3 | 1.3  |
| 1378049_at   | zinc finger protein 362, Zscan20                                                                                                                         | -2.3 | -1.8 |
| 1387015_at   | profilin 2, Pfn2                                                                                                                                         | -2.3 | 1.6  |
| 1372479_at   | Transcribed locus, ---                                                                                                                                   | -2.3 | -1.0 |
| 1397317_at   | Transcribed locus, ---                                                                                                                                   | -2.3 | 1.7  |
| 1388906_at   | ---                                                                                                                                                      | -2.3 | -1.2 |
| 1377427_at   | Protein tyrosine phosphatase, non-receptor type 14 (predicted), Ptpn14_predicted                                                                         | -2.3 | -1.5 |
| 1371816_at   | Transcribed locus, ---                                                                                                                                   | -2.3 | 1.1  |
| 1369735_at   | growth arrest specific 6, Gas6                                                                                                                           | -2.3 | -1.9 |
| 1383633_at   | Transcribed locus, moderately similar to NP_997413.2 oxysterol binding protein-like 1 [Mus musculus], ---                                                | -2.3 | 1.1  |
| 1395779_at   | coiled coil domain containing 88A, Ccdc88a                                                                                                               | -2.3 | 1.2  |
| 1371043_a_at | POU domain, class 3, transcription factor 3, Pou3f3                                                                                                      | -2.3 | -1.1 |
| 1389555_at   | transcription factor 19, Tcf19                                                                                                                           | -2.3 | 1.9  |
| 1379404_at   | Transcribed locus, ---                                                                                                                                   | -2.3 | -1.7 |
| 1388403_at   | isocitrate dehydrogenase 2 (NADP+), mitochondrial, Idh2                                                                                                  | -2.3 | 1.4  |
| 1373733_at   | Bcl-2-related ovarian killer protein, Bok                                                                                                                | -2.3 | 1.1  |
| 1381871_at   | Transcribed locus, ---                                                                                                                                   | -2.3 | -1.4 |
| 1367497_at   | phosphatidylserine synthase 1, Ptdss1                                                                                                                    | -2.3 | -1.1 |
| 1388496_at   | filamin C, gamma (actin binding protein 280) (predicted), Flnc_predicted                                                                                 | -2.3 | -1.5 |
| 1376747_at   | Transcribed locus, strongly similar to NP_001076789.1 membrane associated guanylate kinase, WW and PDZ domain containing 1 isoform b [Mus musculus], --- | -2.3 | -2.3 |
| 1387113_at   | C-terminal binding protein 2, Ctbp2                                                                                                                      | -2.3 | 1.1  |
| 1377653_at   | similar to mKIAA1011 protein, LOC366669                                                                                                                  | -2.3 | -1.3 |
| 1391439_at   | Transcribed locus, ---                                                                                                                                   | -2.3 | -1.9 |
| 1383239_at   | zinc finger, CCHC domain containing 7 (predicted), Zcchc7_predicted                                                                                      | -2.3 | -1.2 |
| 1390283_at   | transcription factor 3 (predicted), Tcf3_predicted                                                                                                       | -2.3 | 1.0  |
| 1373540_at   | hypothetical protein LOC685548, LOC685548                                                                                                                | -2.3 | -1.0 |
| 1386827_at   | similar to procollagen, type IV, alpha 6, LOC363458                                                                                                      | -2.3 | -1.4 |
| 1379358_at   | Sterile alpha motif domain containing 4 (predicted), Samd4_predicted                                                                                     | -2.3 | -1.4 |
| 1379089_at   | Transcribed locus, ---                                                                                                                                   | -2.3 | -1.6 |
| 1374689_at   | phosphatidylinositol 4-kinase, catalytic, beta                                                                                                           | -2.3 | -1.0 |

|              |                                                                                                                                     |      |      |
|--------------|-------------------------------------------------------------------------------------------------------------------------------------|------|------|
|              | polypeptide, Pi4kb                                                                                                                  |      |      |
| 1388856_at   | kit ligand, Kitl                                                                                                                    | -2.3 | 2.9  |
| 1372069_at   | ankyrin repeat domain 15, Ankrd15                                                                                                   | -2.3 | -1.5 |
| 1382558_at   | transcription factor 3 (predicted),<br>Tcf3_predicted                                                                               | -2.2 | -1.0 |
| 1383194_a_at | CDNA clone IMAGE:7379585, ---                                                                                                       | -2.2 | 1.0  |
| 1377392_at   | Transcribed locus, ---                                                                                                              | -2.2 | -2.7 |
| 1375073_at   | similar to hypothetical protein MGC45873<br>(predicted), RGD1310271_predicted                                                       | -2.2 | -1.8 |
| 1379451_at   | Transcribed locus, ---                                                                                                              | -2.2 | -2.5 |
| 1370922_at   | cortexin 1, Ctxn1                                                                                                                   | -2.2 | -1.1 |
| 1369039_at   | phosphatidylinositol 4-kinase, catalytic, beta<br>polypeptide, Pi4kb                                                                | -2.2 | -1.3 |
| 1372895_at   | similar to RIKEN cDNA 5730469M10,<br>RGD1309676                                                                                     | -2.2 | -1.3 |
| 1395203_at   | Transcribed locus, ---                                                                                                              | -2.2 | -1.9 |
| 1367880_at   | laminin, beta 2, Lamb2                                                                                                              | -2.2 | -1.7 |
| 1371434_at   | hypothetical protein LOC691807, rCG_28701                                                                                           | -2.2 | -1.1 |
| 1379918_at   | ---                                                                                                                                 | -2.2 | -1.5 |
| 1388791_at   | similar to 2810022L02Rik protein,<br>RGD1309930                                                                                     | -2.2 | 1.0  |
| 1389134_at   | Transcribed locus, ---                                                                                                              | -2.2 | -1.1 |
| 1373169_at   | 1-acylglycerol-3-phosphate O-acyltransferase 5<br>(lysophosphatidic acid acyltransferase, epsilon)<br>(predicted), Agpat5_predicted | -2.2 | 1.6  |
| 1368927_at   | membrane bound C2 domain containing<br>protein, Mbc2                                                                                | -2.2 | 1.1  |
| 1368287_at   | chimerin (chimaerin) 1, Chn1                                                                                                        | -2.2 | -1.2 |
| 1383433_at   | kelch-like 23 (Drosophila) (predicted),<br>Klhl23_predicted                                                                         | -2.2 | -1.2 |
| 1373812_at   | cyclin-dependent kinase inhibitor 1B, Cdkn1b                                                                                        | -2.2 | -1.8 |
| 1398445_at   | Transcribed locus, ---                                                                                                              | -2.2 | -1.3 |
| 1378038_at   | Transcribed locus, ---                                                                                                              | -2.2 | -1.4 |
| 1370347_at   | PDZ and LIM domain 7, Pdlim7                                                                                                        | -2.2 | -1.3 |
| 1373999_at   | Transcribed locus, ---                                                                                                              | -2.2 | -1.2 |
| 1383614_at   | NUAK family, SNF1-like kinase, 2, Nuak2                                                                                             | -2.2 | -1.5 |
| 1391730_at   | Transcribed locus, ---                                                                                                              | -2.2 | -1.6 |
| 1388840_at   | pleckstrin homology domain containing, family<br>G (with RhoGef domain) member 2 (predicted),<br>Plekhg2_predicted                  | -2.2 | -1.6 |
| 1375047_at   | spermatogenesis associated 5 (predicted),<br>Spata5_predicted                                                                       | -2.2 | 1.6  |
| 1389368_at   | Cnksr family member 3, Cnksr3                                                                                                       | -2.2 | 1.6  |
| 1373569_at   | Transcribed locus, ---                                                                                                              | -2.2 | 1.2  |



|              |                                                                        |      |      |
|--------------|------------------------------------------------------------------------|------|------|
| 1371632_at   | coronin, actin binding protein 1C, Coro1c                              | -2.2 | -1.1 |
| 1392249_at   | Transcribed locus, ---                                                 | -2.2 | -1.4 |
| 1397343_at   | ---                                                                    | -2.2 | -1.2 |
| 1380245_at   | Transcribed locus, ---                                                 | -2.2 | -1.9 |
| 1390925_a_at | immunoglobulin superfamily, member 3<br>(predicted), Igsf3_predicted   | -2.2 | 1.6  |
| 1384150_at   | Transcribed locus, ---                                                 | -2.2 | -1.2 |
| 1386907_at   | enolase 3, beta, muscle, Eno3                                          | -2.2 | 1.3  |
| 1392368_at   | ---                                                                    | -2.1 | -1.3 |
| 1373122_at   | ajuba, Jub                                                             | -2.1 | -1.6 |
| 1370017_at   | emerin, Emd                                                            | -2.1 | -1.1 |
| 1385933_at   | Transcribed locus, ---                                                 | -2.1 | -1.1 |
| 1368827_at   | GATA binding protein 6, Gata6                                          | -2.1 | -1.6 |
| 1377831_at   | monoamine oxidase A, Maa                                               | -2.1 | -2.0 |
| 1383964_at   | ankrin repeat domain 50, Ankrd50                                       | -2.1 | 1.5  |
| 1377879_at   | Transcribed locus, ---                                                 | -2.1 | -1.0 |
| 1382441_at   | AT rich interactive domain 1B (Swi1 like),<br>Arid1b                   | -2.1 | 1.2  |
| 1383414_at   | similar to 9930012K11Rik protein (predicted),<br>RGD1308117_predicted  | -2.1 | -1.8 |
| 1373874_at   | sphingosine-1-phosphate phosphatase 1,<br>Sgpp1                        | -2.1 | -1.0 |
| 1373535_at   | enabled homolog (Drosophila), Enah                                     | -2.1 | 1.2  |
| 1378373_at   | Transcribed locus, ---                                                 | -2.1 | -1.5 |
| 1376996_at   | Transcribed locus, ---                                                 | -2.1 | -1.9 |
| 1375231_a_at | CXXC finger 5, Cxxc5                                                   | -2.1 | 1.3  |
| 1379953_at   | PTC7 protein phosphatase homolog (S.<br>cerevisiae), Pptc7             | -2.1 | -1.3 |
| 1393290_at   | similar to myocyte enhancer factor 2C,<br>LOC309957                    | -2.1 | -1.1 |
| 1369954_at   | isocitrate dehydrogenase 1 (NADP+), soluble,<br>ldh1                   | -2.1 | -1.2 |
| 1398366_at   | Transcribed locus, ---                                                 | -2.1 | -1.0 |
| 1389424_at   | similar to ribosomal protein L22 proprotein,<br>LOC365157              | -2.1 | -1.2 |
| 1373321_at   | Transcribed locus, ---                                                 | -2.1 | -1.5 |
| 1372613_at   | 3-hydroxybutyrate dehydrogenase, type 2<br>(predicted), Bdh2_predicted | -2.1 | -1.3 |
| 1376662_at   | Transcribed locus, ---                                                 | -2.1 | -1.5 |
| 1379847_at   | dysferlin (predicted), Dysf_predicted                                  | -2.1 | -1.4 |
| 1382628_at   | ---                                                                    | -2.1 | -1.5 |
| 1369942_at   | actinin alpha 4, Actn4                                                 | -2.1 | -1.4 |
| 1370247_a_at | peripheral myelin protein 22, Pmp22                                    | -2.1 | 1.9  |
| 1368320_at   | neural cell adhesion molecule 1, Ncam1                                 | -2.1 | -1.8 |

|              |                                                                                                       |      |      |
|--------------|-------------------------------------------------------------------------------------------------------|------|------|
| 1396965_at   | Transcribed locus, ---                                                                                | -2.1 | -1.2 |
| 1388230_at   | ajuba, Jub                                                                                            | -2.1 | -1.8 |
| 1397767_at   | Transcribed locus, ---                                                                                | -2.1 | -1.6 |
| 1367902_at   | guanine nucleotide binding protein (G protein), gamma 11, Gng11                                       | -2.1 | 1.0  |
| 1383193_at   | ---                                                                                                   | -2.1 | -1.7 |
| 1379817_at   | purine-rich element binding protein G (predicted), Purg_predicted                                     | -2.1 | -1.5 |
| 1368136_at   | thymopoietin, Tmpo                                                                                    | -2.1 | 2.0  |
| 1374161_at   | importin 11 (predicted), Ipo11_predicted                                                              | -2.1 | 1.2  |
| 1381144_at   | Transcribed locus, ---                                                                                | -2.1 | 1.1  |
| 1389528_s_at | Jun oncogene, Jun                                                                                     | -2.1 | 4.8  |
| 1388522_at   | PTC7 protein phosphatase homolog (S. cerevisiae), Pptc7                                               | -2.1 | -1.0 |
| 1380155_at   | Transcribed locus, ---                                                                                | -2.1 | -1.7 |
| 1390638_at   | Eph receptor A4, Epha4                                                                                | -2.1 | 1.4  |
| 1380533_at   | amyloid beta (A4) precursor protein, App                                                              | -2.1 | -1.7 |
| 1389411_at   | Transcribed locus, ---                                                                                | -2.1 | -1.1 |
| 1389003_at   | Rho-related BTB domain containing 3 (predicted), Rhobtb3_predicted                                    | -2.1 | -1.5 |
| 1379277_at   | Transcribed locus, ---                                                                                | -2.1 | -1.7 |
| 1375954_at   | S100 calcium binding protein A13 (predicted), S100a13_predicted                                       | -2.1 | 1.3  |
| 1388154_at   | E2F transcription factor 5, E2f5                                                                      | -2.1 | 1.7  |
| 1377522_a_at | similar to KIAA1086 protein (predicted), RGD1304737_predicted                                         | -2.1 | -2.0 |
| 1384081_at   | Transcribed locus, ---                                                                                | -2.1 | -2.6 |
| 1376763_at   | Transcribed locus, ---                                                                                | -2.1 | -1.7 |
| 1375377_at   | immunoglobulin superfamily, member 3 (predicted), Igsf3_predicted                                     | -2.0 | 3.0  |
| 1372736_at   | amylo-1,6-glucosidase, 4-alpha-glucanotransferase, Agl                                                | -2.0 | -1.7 |
| 1379541_at   | transmembrane and tetratricopeptide repeat containing 4, Tmtc4                                        | -2.0 | 1.2  |
| 1372814_at   | SFT2 domain containing 2, Sft2d2                                                                      | -2.0 | -1.5 |
| 1376868_at   | Cobl-like 1 (predicted), Cobll1_predicted                                                             | -2.0 | -1.9 |
| 1368839_at   | Wolfram syndrome 1 homolog (human), Wfs1                                                              | -2.0 | -1.4 |
| 1379294_at   | Transcribed locus, ---                                                                                | -2.0 | -1.1 |
| 1390440_at   | solute carrier family 9 (sodium/hydrogen exchanger), isoform 6, Slc9a6                                | -2.0 | -1.1 |
| 1376762_at   | pleckstrin homology domain containing, family A (phosphoinositide binding specific) member 1, Plekha1 | -2.0 | 1.5  |
| 1386569_at   | Transcribed locus, ---                                                                                | -2.0 | 1.7  |
| 1397161_a_at | intersectin 1, Itsn1                                                                                  | -2.0 | -1.4 |

|            |                                                                                  |      |      |
|------------|----------------------------------------------------------------------------------|------|------|
| 1374572_at | similar to opposite strand transcription unit to Stag3; Gats protein, RGD1304774 | -2.0 | -1.6 |
| 1389367_at | schwannomin interacting protein 1, Schip1                                        | -2.0 | -1.1 |
| 1371970_at | family with sequence similarity 111, member A, Fam111a                           | -2.0 | 1.5  |
| 1367811_at | 3-phosphoglycerate dehydrogenase, Phgdh                                          | -2.0 | 2.0  |
| 1383501_at | Transcribed locus, ---                                                           | -2.0 | -1.2 |
| 1371382_at | filamin, alpha (predicted), Flna_predicted                                       | -2.0 | -1.8 |
| 1396009_at | ---                                                                              | -2.0 | -1.3 |
| 1379274_at | Transcribed locus, ---                                                           | -2.0 | -1.2 |
| 1383883_at | kelch-like 30 (Drosophila), Klhl30                                               | -2.0 | -1.2 |
| 1378342_at | endothelin receptor type A, Ednra                                                | -2.0 | 1.7  |
| 1383284_at | Transcribed locus, ---                                                           | -2.0 | -1.3 |

---

**Supplemental Table V: Distinctly PDGF-DD repressed genes in SMCs**

| <b>Accession Number</b> | <b>Gene</b>                                                                                                 | <b>IL-1<math>\beta</math> Fold Change</b> | <b>PDGF-DD Fold Change</b> |
|-------------------------|-------------------------------------------------------------------------------------------------------------|-------------------------------------------|----------------------------|
| 1376956_at              | Transcribed locus, ---                                                                                      | -40.2                                     | -56.8                      |
| 1374298_at              | Transcribed locus, ---                                                                                      | 1.6                                       | -41.3                      |
| 1369814_at              | chemokine (C-C motif) ligand 20, Ccl20                                                                      | 58.9                                      | -20.3                      |
| 1368731_at              | orosomuroid 1, Orm1                                                                                         | 248.4                                     | -17.2                      |
| 1385751_at              | thrombospondin 2, Thbs2                                                                                     | 10.8                                      | -15.9                      |
| 1384240_at              | angiotensin II receptor, type 1a, Agtr1a                                                                    | 6.7                                       | -12.6                      |
| 1373697_at              | myosin binding protein C, fast-type (predicted), Mybpc2_predicted                                           | -3.0                                      | -12.1                      |
| 1370382_at              | RT1 class II, locus Db1, RT1-Db1                                                                            | 14.1                                      | -11.8                      |
| 1374989_at              | ankyrin repeat and SOCS box-containing protein 12, Asb12                                                    | 39.0                                      | -11.2                      |
| 1388201_at              | bone morphogenetic protein 6, Bmp6                                                                          | 11.0                                      | -9.2                       |
| 1390037_at              | Na <sup>+</sup> /K <sup>+</sup> transporting ATPase interacting 4, Nkain4                                   | -3.4                                      | -8.8                       |
| 1389470_at              | complement component 2                                                                                      | 49.5                                      | -8.6                       |
| 1376105_at              | procollagen, type XIV, alpha 1 (predicted), Col14a1_predicted                                               | -1.0                                      | -8.1                       |
| 1387493_at              | A kinase (PRKA) anchor protein 5, Akap5                                                                     | -2.9                                      | -7.8                       |
| 1388879_at              | similar to ABI gene family, member 3 (NESH) binding protein (predicted), RGD1562717_predicted               | -1.1                                      | -7.7                       |
| 1367862_at              | Ras-related associated with diabetes, Rrad                                                                  | 4.1                                       | -7.7                       |
| 1368128_at              | phospholipase A2, group IIA (platelets, synovial fluid), Pla2g2a                                            | 4147.1                                    | -7.6                       |
| 1369291_at              | angiotensin II receptor, type 1a, Agtr1a                                                                    | 6.6                                       | -7.4                       |
| 1370148_at              | haptoglobin, Hp                                                                                             | 8.8                                       | -7.4                       |
| 1367700_at              | fibromodulin, Fmod                                                                                          | -1.6                                      | -7.2                       |
| 1388920_at              | bone morphogenetic protein 6, Bmp6                                                                          | 20.8                                      | -7.0                       |
| 1391936_a_at            | Transcribed locus, ---                                                                                      | -1.9                                      | -7.0                       |
| 1374172_at              | Transcribed locus, ---                                                                                      | -1.1                                      | -6.8                       |
| 1389214_at              | laminin, alpha 4, Lama4                                                                                     | 6.6                                       | -6.8                       |
| 1373615_at              | frizzled-related protein, Frzb                                                                              | 1.9                                       | -6.5                       |
| 1395153_at              | claudin 15 (predicted), Cldn15_predicted                                                                    | -1.0                                      | -6.4                       |
| 1370157_at              | phospholamban, Pln                                                                                          | -2.7                                      | -6.4                       |
| 1368474_at              | vascular cell adhesion molecule 1, Vcam1                                                                    | 6.1                                       | -6.4                       |
| 1367679_at              | CD74 antigen (invariant polypeptide of major histocompatibility complex, class II antigen-associated), Cd74 | 32.5                                      | -6.1                       |
| 1390969_at              | Transcribed locus, ---                                                                                      | 1.4                                       | -6.0                       |

|            |                                                                                                            |      |      |
|------------|------------------------------------------------------------------------------------------------------------|------|------|
| 1376170_at | procollagen, type XIV, alpha 1 (predicted), Col14a1_predicted                                              | -1.2 | -6.0 |
| 1368536_at | ectonucleotide pyrophosphatase/phosphodiesterase 2, Enpp2                                                  | 21.0 | -6.0 |
| 1393084_at | HRAS-like suppressor (predicted), Hrasls_predicted                                                         | 2.0  | -6.0 |
| 1375961_at | frizzled-related protein, Frzb                                                                             | 1.5  | -5.9 |
| 1383225_at | Transcribed locus, ---                                                                                     | 2.4  | -5.6 |
| 1385074_at | SWI/SNF related, matrix associated, actin dependent regulator of chromatin, subfamily a, member 2, Smarca2 | -1.7 | -5.6 |
| 1374352_at | actin, alpha, cardiac 1, Actc1                                                                             | -2.5 | -5.3 |
| 1385637_at | Similar to sushi, von Willebrand factor type A, EGF and pentraxin domain containing 1, LOC685899           | 2.4  | -5.2 |
| 1369943_at | transglutaminase 2, C polypeptide, Tgm2                                                                    | 1.7  | -5.1 |
| 1379331_at | tenascin N (predicted), Tnn_predicted                                                                      | 1.9  | -5.1 |
| 1368201_at | natriuretic peptide receptor 1, Npr1                                                                       | -1.2 | -5.0 |
| 1370883_at | transporter 1, ATP-binding cassette, sub-family B (MDR/TAP)                                                | 20.9 | -4.9 |
| 1392686_at | naked cuticle 2 homolog (Drosophila) (predicted), Nkd2_predicted                                           | 1.0  | -4.9 |
| 1389464_at | ligand of numb-protein X 1 (predicted), Lnx1_predicted                                                     | 7.5  | -4.8 |
| 1368147_at | dual specificity phosphatase 1, Dusp1                                                                      | -1.9 | -4.8 |
| 1370822_at | RT1 class II, locus Ba, RT1-Ba                                                                             | 31.9 | -4.7 |
| 1383322_at | RAS-like family 11 member B, Rasl11b                                                                       | 1.2  | -4.7 |
| 1373345_at | adhesion molecule with Ig like domain 2, Amigo2                                                            | 1.1  | -4.6 |
| 1388924_at | angiopoietin-like 4, Angptl4                                                                               | 7.0  | -4.6 |
| 1373288_at | suppression of tumorigenicity 5 (predicted), St5_predicted                                                 | -1.4 | -4.6 |
| 1376750_at | Transcribed locus, ---                                                                                     | 4.5  | -4.5 |
| 1387241_at | G-protein coupled receptor 88, Gpr88                                                                       | -1.3 | -4.5 |
| 1372585_at | RGD1566254 (predicted), RGD1566254_predicted                                                               | 2.0  | -4.4 |
| 1393252_at | Transcribed locus, ---                                                                                     | 9.1  | -4.3 |
| 1395110_at | Transcribed locus, ---                                                                                     | 15.7 | -4.3 |
| 1389159_at | Transcribed locus, ---                                                                                     | 2.8  | -4.3 |
| 1373903_at | RCSD domain containing 1 (predicted), Rcsd1_predicted                                                      | 1.2  | -4.3 |
| 1368249_at | Kruppel-like factor 15, Klf15                                                                              | 2.3  | -4.3 |
| 1368000_at | complement component 3, C3                                                                                 | 19.8 | -4.2 |
| 1376617_at | Transcribed locus, ---                                                                                     | 6.8  | -4.2 |
| 1367755_at | cysteine dioxygenase 1, cytosolic, Cdo1                                                                    | 7.3  | -4.2 |

|              |                                                                       |      |      |
|--------------|-----------------------------------------------------------------------|------|------|
| 1385354_at   | similar to integrin alpha 8 (predicted),<br>RGD1564327_predicted      | -1.6 | -4.2 |
| 1368771_at   | sulfatase 1, Sulf1                                                    | 3.6  | -4.1 |
| 1370383_s_at | transporter 1, ATP-binding cassette, sub-family<br>B (MDR/TAP)        | 15.8 | -4.0 |
| 1376106_at   | transmembrane protein 178, Tmem178                                    | -1.6 | -4.0 |
| 1374726_at   | fibronectin type III domain containing 1, Fndc1                       | 1.4  | -4.0 |
| 1373882_at   | c-fos induced growth factor, Figf                                     | 4.4  | -3.9 |
| 1379885_at   | flavin containing monooxygenase 4, Fmo4                               | 2.2  | -3.9 |
| 1381262_at   | Transcribed locus, ---                                                | -1.9 | -3.9 |
| 1372016_at   | growth arrest and DNA-damage-inducible 45<br>beta, Gadd45b            | 1.5  | -3.9 |
| 1373748_at   | PDZ domain containing RING finger 3<br>(predicted), Pdzn3_predicted   | 1.8  | -3.8 |
| 1392590_at   | Rho GTPase activating protein 24, Arhgap24                            | -1.3 | -3.8 |
| 1370892_at   | complement component 4a                                               | 1.6  | -3.8 |
| 1390403_at   | family with sequence similarity 43, member A,<br>Fam43a               | 2.2  | -3.8 |
| 1373240_at   | dehydrogenase/reductase (SDR family)<br>member 3, Dhrs3               | -1.3 | -3.8 |
| 1387868_at   | lipopolysaccharide binding protein, Lbp                               | 18.7 | -3.8 |
| 1370256_at   | frizzled homolog 1 (Drosophila), Fzd1                                 | 1.3  | -3.7 |
| 1393295_at   | similar to RIKEN cDNA 2610019F03,<br>LOC498662                        | 1.2  | -3.7 |
| 1387763_at   | RAB27A, member RAS oncogene family,<br>Rab27a                         | -2.6 | -3.7 |
| 1387898_at   | heat shock protein, alpha-crystallin-related, B6,<br>Hspb6            | -1.7 | -3.7 |
| 1395374_at   | Transcribed locus, ---                                                | 4.0  | -3.7 |
| 1390536_at   | Transcribed locus, ---                                                | 1.2  | -3.6 |
| 1390075_at   | olfactomedin-like 2B (predicted),<br>Olfml2b_predicted                | 1.1  | -3.6 |
| 1367664_at   | ankyrin repeat domain 1 (cardiac muscle),<br>Ankrd1                   | -1.9 | -3.6 |
| 1379318_at   | Transcribed locus, ---                                                | 1.3  | -3.6 |
| 1387655_at   | chemokine (C-X-C motif) ligand 12, Cxcl12                             | -1.1 | -3.5 |
| 1389632_at   | Rho-related BTB domain containing 1<br>(predicted), Rhobtb1_predicted | -1.6 | -3.5 |
| 1384371_at   | TEA domain family member 3, Tead3                                     | -1.7 | -3.5 |
| 1398233_at   | Transcribed locus, ---                                                | -1.0 | -3.4 |
| 1392644_s_at | similar to RIKEN cDNA 2610019F03,<br>LOC498662                        | 1.2  | -3.4 |
| 1397453_at   | Transcribed locus, ---                                                | -1.9 | -3.4 |
| 1388471_at   | t-complex 11 (mouse) like 2, Tcp11l2                                  | 1.4  | -3.4 |
| 1390119_at   | secreted frizzled-related protein 2, Sfrp2                            | 1.3  | -3.3 |

|              |                                                                                                                                |      |      |
|--------------|--------------------------------------------------------------------------------------------------------------------------------|------|------|
| 1389295_at   | olfactomedin-like 2B (predicted),<br>Olfml2b_predicted                                                                         | -1.4 | -3.3 |
| 1378927_at   | ---                                                                                                                            | 6.1  | -3.3 |
| 1388742_at   | ---                                                                                                                            | -1.1 | -3.3 |
| 1389095_at   | biregional cell adhesion molecule-related/down-<br>regulated by oncogenes (Cdon) binding protein<br>(predicted), Boc_predicted | -1.1 | -3.3 |
| 1382746_s_at | Transcribed locus, ---                                                                                                         | 2.5  | -3.3 |
| 1396614_at   | secreted frizzled-related protein 2, Sfrp2                                                                                     | 1.4  | -3.2 |
| 1374060_at   | Transcribed locus, ---                                                                                                         | -1.9 | -3.1 |
| 1393225_at   | Similar to a disintegrin-like and metalloprotease<br>(reprolysin type) with thrombospondin type 1<br>motif, 10, LOC314655      | -1.5 | -3.1 |
| 1398622_at   | cysteine rich transmembrane BMP regulator 1<br>(chordin like), Crim1                                                           | -1.9 | -3.1 |
| 1382745_at   | Transcribed locus, ---                                                                                                         | 3.0  | -3.1 |
| 1376734_at   | Transcribed locus, ---                                                                                                         | -1.1 | -3.1 |
| 1374246_at   | Transcribed locus, ---                                                                                                         | 6.7  | -3.1 |
| 1374971_at   | Transcribed locus, ---                                                                                                         | -1.2 | -3.1 |
| 1383173_at   | ---                                                                                                                            | 1.5  | -3.1 |
| 1390789_at   | acyl-Coenzyme A dehydrogenase family,<br>member 11 (predicted), Acad11_predicted                                               | 1.6  | -3.1 |
| 1368565_at   | solute carrier family 1 (glial high affinity<br>glutamate transporter), member 3, Slc1a3                                       | 1.0  | -3.1 |
| 1369973_at   | xanthine dehydrogenase, Xdh                                                                                                    | 12.5 | -3.0 |
| 1380937_at   | CDNA clone IMAGE:7461178, ---                                                                                                  | -1.0 | -3.0 |
| 1369393_at   | mitogen-activated protein kinase kinase<br>kinase 8, Map3k8                                                                    | 88.0 | -3.0 |
| 1368618_at   | growth factor receptor bound protein 14, Grb14                                                                                 | -1.2 | -3.0 |
| 1387454_at   | niban protein, Niban                                                                                                           | -1.0 | -3.0 |
| 1371031_at   | methionine adenosyltransferase I, alpha, Mat1a                                                                                 | -1.9 | -2.9 |
| 1378942_at   | Transcribed locus, ---                                                                                                         | -1.2 | -2.9 |
| 1392870_at   | ---                                                                                                                            | -1.2 | -2.9 |
| 1370161_at   | coiled-coil domain containing 80, Ccdc80                                                                                       | -1.4 | -2.9 |
| 1396109_at   | anthrax toxin receptor 1, Antxr1                                                                                               | -1.7 | -2.9 |
| 1374061_at   | CD302 antigen, Cd302                                                                                                           | 6.1  | -2.9 |
| 1383300_at   | kelch-like 24 (Drosophila), Klhl24                                                                                             | 1.6  | -2.9 |
| 1370951_at   | phosphatidic acid phosphatase type 2B,<br>Ppap2b                                                                               | -1.3 | -2.9 |
| 1389066_at   | regulator of calcineurin 2, Rcan2                                                                                              | 2.6  | -2.9 |
| 1381654_at   | Transcribed locus, ---                                                                                                         | -1.3 | -2.9 |
| 1379868_at   | pre-B-cell leukemia transcription factor<br>interacting protein 1, Pbxip1                                                      | -1.9 | -2.9 |
| 1378484_at   | RAS-like, family 12 (predicted),                                                                                               | 3.6  | -2.9 |

|            |                                                                                          |      |      |
|------------|------------------------------------------------------------------------------------------|------|------|
|            | Rasl12_predicted                                                                         |      |      |
| 1372027_at | Transcribed locus, ---                                                                   | 7.9  | -2.8 |
| 1374029_at | ---                                                                                      | 1.4  | -2.8 |
| 1370113_at | baculoviral IAP repeat-containing 3, Birc3                                               | 10.6 | -2.8 |
| 1373062_at | Transcribed locus, ---                                                                   | 2.3  | -2.8 |
| 1396057_at | Transcribed locus, ---                                                                   | -1.5 | -2.8 |
| 1380318_at | Transcribed locus, ---                                                                   | 2.8  | -2.8 |
| 1375910_at | CDC42 effector protein (Rho GTPase binding) 3 (predicted), Cdc42ep3_predicted            | -1.8 | -2.8 |
| 1391593_at | Ras association (RalGDS/AF-6) domain family 4, Rassf4                                    | 12.2 | -2.8 |
| 1383047_at | growth arrest specific 6, Gas6                                                           | -1.3 | -2.8 |
| 1370218_at | lactate dehydrogenase B, Ldhb                                                            | 1.4  | -2.8 |
| 1380556_at | F-box protein 10, Fbxo10                                                                 | -1.8 | -2.8 |
| 1384287_at | Transcribed locus, ---                                                                   | -1.2 | -2.8 |
| 1383241_at | complement component 1, r subcomponent, C1r                                              | 2.1  | -2.8 |
| 1389420_at | signal transducing adaptor family member 2, Stap2                                        | 49.6 | -2.8 |
| 1368883_at | nephroblastoma overexpressed gene, Nov                                                   | -1.2 | -2.8 |
| 1374038_at | Transcribed locus, ---                                                                   | 1.3  | -2.8 |
| 1370173_at | superoxide dismutase 2, mitochondrial, Sod2                                              | 13.1 | -2.7 |
| 1397837_at | Transcribed locus, ---                                                                   | 3.4  | -2.7 |
| 1383560_at | Transcribed locus, ---                                                                   | 2.6  | -2.7 |
| 1387376_at | aldehyde oxidase 1, Aox1                                                                 | 1.2  | -2.7 |
| 1383069_at | similar to RNA binding motif, single stranded interacting protein 3 isoform 1, LOC680726 | -1.7 | -2.7 |
| 1388494_at | procollagen, type IV, alpha 2 (predicted), Col4a2_predicted                              | -1.3 | -2.7 |
| 1370285_at | calcium binding and coiled coil domain 1, Calcoco1                                       | 1.0  | -2.7 |
| 1381533_at | Rho family GTPase 1, Rnd1                                                                | 9.2  | -2.7 |
| 1368247_at | heat shock 70kD protein 1A, Hspa1b                                                       | -1.4 | -2.7 |
| 1374235_at | regulator of calcineurin 2, Rcan2                                                        | 1.8  | -2.7 |
| 1384852_at | RAB27A, member RAS oncogene family, Rab27a                                               | -1.9 | -2.7 |
| 1375874_at | similar to cDNA sequence BC013529 (predicted), RGD1309759_predicted                      | 3.2  | -2.7 |
| 1392784_at | growth arrest specific 6, Gas6                                                           | 1.1  | -2.7 |
| 1375011_at | Transcribed locus, ---                                                                   | 3.6  | -2.7 |
| 1373740_at | ---                                                                                      | 2.0  | -2.7 |
| 1371436_at | dimethylarginine dimethylaminohydrolase 2, Ddah2                                         | -1.7 | -2.7 |
| 1385243_at | Transcribed locus, ---                                                                   | -1.1 | -2.6 |



|              |                                                                                                                                    |      |      |
|--------------|------------------------------------------------------------------------------------------------------------------------------------|------|------|
| 1387121_a_at | N-myc downstream regulated gene 2, Ndrp2                                                                                           | -1.4 | -2.6 |
| 1367957_at   | regulator of G-protein signaling 3, Rgs3                                                                                           | 1.4  | -2.6 |
| 1373719_at   | mitogen-activated protein kinase kinase kinase 3, Map4k3                                                                           | -1.9 | -2.6 |
| 1367570_at   | transgelin, Tagln                                                                                                                  | -2.0 | -2.6 |
| 1382226_at   | Similar to RNA binding motif, single stranded interacting protein 3 isoform 1, LOC680726                                           | -1.8 | -2.6 |
| 1392525_at   | Transcribed locus, ---                                                                                                             | 1.9  | -2.6 |
| 1373149_at   | similar to yippee-like 3 (predicted), RGD1564579_predicted                                                                         | 1.1  | -2.6 |
| 1389546_at   | Transcribed locus, ---                                                                                                             | 1.2  | -2.6 |
| 1367749_at   | lumican, Lum                                                                                                                       | 3.0  | -2.6 |
| 1372325_at   | elastin microfibril interfacier 1 (predicted), Emilin1_predicted                                                                   | 1.4  | -2.6 |
| 1386611_at   | kelch-like 24 (Drosophila), Klhl24                                                                                                 | 1.5  | -2.6 |
| 1372472_at   | similar to Microtubule-associated protein RP/EB family member 2 (APC-binding protein EB2) (End-binding protein 2) (EB2), LOC679221 | 1.9  | -2.6 |
| 1382312_at   | AT rich interactive domain 5B (Mrf1 like) (predicted), Arid5b_predicted                                                            | 1.3  | -2.5 |
| 1369959_at   | zinc finger protein 36, C3H type-like 1, Zfp3611                                                                                   | 1.8  | -2.5 |
| 1378997_at   | Eph receptor B6, Ephb6                                                                                                             | -1.2 | -2.5 |
| 1371042_at   | mitogen-activated protein kinase kinase kinase 3, Map4k3                                                                           | -1.9 | -2.5 |
| 1372439_at   | procollagen, type IV, alpha 1, Col4a2_predicted                                                                                    | -1.4 | -2.5 |
| 1370912_at   | heat shock 70kD protein 1B (mapped), Hspa1b                                                                                        | -1.2 | -2.5 |
| 1391264_at   | Transcribed locus, ---                                                                                                             | 2.4  | -2.5 |
| 1369961_at   | phosphatidic acid phosphatase 2a, Ppap2a                                                                                           | 2.5  | -2.5 |
| 1383110_at   | kelch-like 24 (Drosophila), Klhl24                                                                                                 | 1.4  | -2.5 |
| 1384188_at   | ---                                                                                                                                | 1.5  | -2.5 |
| 1372328_at   | kinesin light chain 4, Klc4                                                                                                        | -1.2 | -2.4 |
| 1369633_at   | chemokine (C-X-C motif) ligand 12, Cxcl12                                                                                          | -1.2 | -2.4 |
| 1394483_at   | A disintegrin-like and metallopeptidase (reprolysin type) with thrombospondin type 1 motif, 5 (aggrecanase-2), Adamts5             | 2.5  | -2.4 |
| 1372964_at   | Transcribed locus, ---                                                                                                             | 1.2  | -2.4 |
| 1383531_at   | ---                                                                                                                                | 1.4  | -2.4 |
| 1387893_at   | complement component 1, s subcomponent, C1s                                                                                        | 2.6  | -2.4 |
| 1372000_at   | neuroepithelial cell transforming gene 1, Net1                                                                                     | 1.3  | -2.4 |
| 1374284_at   | Ras association (RalGDS/AF-6) domain family 4, Rassf4                                                                              | 12.2 | -2.4 |
| 1381781_at   | Transcribed locus, ---                                                                                                             | 1.3  | -2.4 |
| 1381646_at   | ---                                                                                                                                | 1.8  | -2.4 |

|              |                                                                                                                       |      |      |
|--------------|-----------------------------------------------------------------------------------------------------------------------|------|------|
| 1371916_at   | similar to Methionine-R-sulfoxide reductase (Selenoprotein X 1) (Selenoprotein R), MGC105753                          | -1.3 | -2.4 |
| 1389145_at   | CDC42 effector protein (Rho GTPase binding) 2, Cdc42ep2                                                               | 1.9  | -2.4 |
| 1377754_at   | Transcribed locus, ---                                                                                                | -1.9 | -2.4 |
| 1388545_at   | SPARC-related modular calcium binding protein 1, Smoc1                                                                | -1.9 | -2.4 |
| 1390323_at   | Transcribed locus, ---                                                                                                | -1.2 | -2.4 |
| 1376615_at   | TEA domain family member 3, Tead3                                                                                     | -1.6 | -2.4 |
| 1379433_at   | phosphatidylinositol 3-kinase, C2 domain containing, alpha polypeptide (predicted), Pik3c2a_predicted                 | -1.5 | -2.4 |
| 1378842_at   | gamma-aminobutyric acid (GABA(A)) receptor-associated protein-like 1 (predicted), MGC125167                           | 1.7  | -2.4 |
| 1375517_at   | tumor protein p53 inducible nuclear protein 2, Trp53inp2                                                              | 2.1  | -2.3 |
| 1384728_at   | forkhead box N3, Foxn3                                                                                                | -1.6 | -2.3 |
| 1391630_at   | T-box18 (predicted), Tbx18_predicted                                                                                  | -1.2 | -2.3 |
| 1373245_at   | procollagen, type IV, alpha 1, Col4a2_predicted                                                                       | -1.2 | -2.3 |
| 1374575_at   | cAMP responsive element binding protein 3-like 1, Creb3l1                                                             | 7.3  | -2.3 |
| 1392852_at   | SPARC-related modular calcium binding protein 1, Smoc1                                                                | -1.9 | -2.3 |
| 1376128_at   | Transcribed locus, ---                                                                                                | 13.3 | -2.3 |
| 1374870_at   | Procollagen, type XXVII, alpha 1, Col27a1                                                                             | -1.6 | -2.3 |
| 1377892_at   | sema domain, immunoglobulin domain (Ig), short basic domain, secreted, (semaphorin) 3 F (predicted), Sema3f_predicted | -1.8 | -2.3 |
| 1369929_at   | prosaposin, Psap                                                                                                      | -1.3 | -2.3 |
| 1388492_at   | TNFAIP3 interacting protein 1 (predicted), Tnip1_predicted                                                            | 2.0  | -2.3 |
| 1388583_at   | chemokine (C-X-C motif) ligand 12, Cxcl12                                                                             | 1.1  | -2.3 |
| 1392893_a_at | Transcribed locus, ---                                                                                                | -1.3 | -2.3 |
| 1368134_a_at | interleukin 4 receptor, alpha, Il4ra                                                                                  | 2.8  | -2.3 |
| 1387874_at   | D site albumin promoter binding protein, Dbp                                                                          | -1.4 | -2.3 |
| 1380908_at   | Transcribed locus, ---                                                                                                | -1.4 | -2.3 |
| 1378506_at   | phosphatidylinositol 3-kinase, C2 domain containing, alpha polypeptide (predicted), Pik3c2a_predicted                 | -1.4 | -2.3 |
| 1387042_at   | calcium channel, voltage-dependent, beta 3 subunit, Cacnb3                                                            | -1.3 | -2.3 |
| 1374550_at   | MAP kinase-interacting serine/threonine kinase 1, Mknk1                                                               | -1.1 | -2.3 |

|              |                                                                                                                                             |      |      |
|--------------|---------------------------------------------------------------------------------------------------------------------------------------------|------|------|
| 1369688_s_at | protein tyrosine kinase 2 beta, Ptk2b                                                                                                       | -1.4 | -2.3 |
| 1375958_at   | similar to TSC22 domain family protein 4 (TSC22-related-inducible leucine zipper protein 2), LOC686226                                      | -1.3 | -2.2 |
| 1367842_at   | amyloid beta (A4) precursor protein-binding, family B, member 1, Apbb1                                                                      | -1.3 | -2.2 |
| 1378321_at   | Ras association (RalGDS/AF-6) domain family 4, Rassf4                                                                                       | 9.7  | -2.2 |
| 1385252_at   | tripartite motif-containing 6, Trim6                                                                                                        | -1.1 | -2.2 |
| 1383058_at   | Transcribed locus, ---                                                                                                                      | -1.3 | -2.2 |
| 1373684_at   | kelch-like 31 (Drosophila), Klhl31                                                                                                          | -2.1 | -2.2 |
| 1379495_at   | Transcribed locus, ---                                                                                                                      | -1.9 | -2.2 |
| 1376810_at   | M-phase phosphoprotein 8, Parp4                                                                                                             | 2.0  | -2.2 |
| 1373104_at   | SPECC1-like, Specc1l                                                                                                                        | -1.4 | -2.2 |
| 1379935_at   | chemokine (C-C motif) ligand 7, Ccl7                                                                                                        | 12.7 | -2.2 |
| 1389787_at   | PTK7 protein tyrosine kinase 7 (predicted), Ptk7_predicted                                                                                  | 1.6  | -2.2 |
| 1372706_at   | hexosaminidase B, Hexb                                                                                                                      | 1.4  | -2.2 |
| 1379971_at   | zinc finger CCCH type containing 6 (predicted), Zc3h6_predicted                                                                             | -1.1 | -2.2 |
| 1368702_at   | PRKC, apoptosis, WT1, regulator, Pawr                                                                                                       | -1.8 | -2.2 |
| 1382311_at   | Traf2 binding protein, T2bp                                                                                                                 | 7.0  | -2.2 |
| 1386885_at   | enoyl coenzyme A hydratase 1, peroxisomal, Ech1                                                                                             | -1.6 | -2.2 |
| 1390207_at   | large tumor suppressor 2 (predicted), Lats2_predicted                                                                                       | -1.6 | -2.2 |
| 1372468_at   | CD97 antigen, Cd97                                                                                                                          | -1.9 | -2.2 |
| 1383462_at   | zinc finger protein 294, Zfp294                                                                                                             | -1.1 | -2.2 |
| 1388527_at   | Transcribed locus, ---                                                                                                                      | -1.4 | -2.2 |
| 1370952_at   | glutathione S-transferase, mu 2, Gstm2                                                                                                      | -1.7 | -2.2 |
| 1374728_at   | Transcribed locus, ---                                                                                                                      | 1.7  | -2.2 |
| 1396701_at   | Transcribed locus, ---                                                                                                                      | -1.3 | -2.2 |
| 1393356_at   | Transcribed locus, ---                                                                                                                      | -1.7 | -2.2 |
| 1371680_at   | similar to gamma-aminobutyric acid (GABA(A)) receptor-associated protein-like 1, MGC125167                                                  | 1.8  | -2.2 |
| 1374530_at   | frizzled homolog 7 (Drosophila) (predicted), Fzd7_predicted                                                                                 | -1.4 | -2.2 |
| 1392385_at   | Nuclear receptor coactivator 3, Ncoa3                                                                                                       | 1.5  | -2.2 |
| 1383948_at   | similar to TPR repeat-containing protein KIAA1043, LOC304558                                                                                | -1.5 | -2.2 |
| 1383201_at   | Transcribed locus, strongly similar to NP_031587.1 bone morphogenic protein receptor, type II (serine/threonine kinase) [Mus musculus], --- | 1.4  | -2.2 |
| 1388243_at   | G protein-coupled receptor 176, Gpr176                                                                                                      | 2.0  | -2.2 |

|              |                                                                                                          |      |      |
|--------------|----------------------------------------------------------------------------------------------------------|------|------|
| 1394550_at   | similar to CG1998-PA, LOC691221                                                                          | -1.4 | -2.2 |
| 1391476_at   | Transcribed locus, ---                                                                                   | -1.5 | -2.2 |
| 1373922_at   | Transcribed locus, ---                                                                                   | -1.9 | -2.2 |
| 1370202_at   | HRAS like suppressor 3, Hrasls3                                                                          | -1.3 | -2.2 |
| 1368322_at   | superoxide dismutase 3, extracellular, Sod3                                                              | 2.2  | -2.2 |
| 1388525_at   | phosphoinositide-3-kinase interacting protein 1, Pik3ip1                                                 | -1.4 | -2.2 |
| 1378414_at   | Transcribed locus, ---                                                                                   | -1.3 | -2.1 |
| 1389256_at   | Transcribed locus, ---                                                                                   | -1.3 | -2.1 |
| 1368519_at   | serine (or cysteine) peptidase inhibitor, clade E, member 1, Serpine1                                    | 3.5  | -2.1 |
| 1391616_at   | ---                                                                                                      | 1.4  | -2.1 |
| 1392264_s_at | serine (or cysteine) peptidase inhibitor, clade E, member 1, Serpine1                                    | 3.6  | -2.1 |
| 1368172_a_at | lysyl oxidase, Lox                                                                                       | 1.1  | -2.1 |
| 1372719_at   | ---                                                                                                      | 1.9  | -2.1 |
| 1373248_at   | Similar to hypothetical protein FLJ20674 (predicted), RGD1565800_predicted                               | -1.3 | -2.1 |
| 1379371_at   | Transcribed locus, ---                                                                                   | 6.4  | -2.1 |
| 1368754_at   | pyrimidinergic receptor P2Y, G-protein coupled, 6, P2ry6                                                 | 4.4  | -2.1 |
| 1377940_at   | family with sequence similarity 101, member B, Fam101b                                                   | 2.6  | -2.1 |
| 1389562_at   | Transcribed locus, ---                                                                                   | 1.9  | -2.1 |
| 1373189_at   | megakaryoblastic leukemia (translocation) 1, Mkl1                                                        | -1.4 | -2.1 |
| 1376610_a_at | similar to TPR repeat-containing protein KIAA1043, LOC304558                                             | -1.7 | -2.1 |
| 1387011_at   | lipocalin 2, Lcn2                                                                                        | 9.1  | -2.1 |
| 1383952_at   | microtubule associated monooxygenase, calponin and LIM domain containing 1 (predicted), Mical1_predicted | -1.8 | -2.1 |
| 1384250_a_at | Transcribed locus, ---                                                                                   | -1.4 | -2.1 |
| 1371988_at   | mannosidase 1, alpha (predicted), Man1a_predicted                                                        | 1.0  | -2.1 |
| 1376282_at   | Transcribed locus, ---                                                                                   | 1.3  | -2.1 |
| 1391603_at   | Transcribed locus, ---                                                                                   | -1.7 | -2.1 |
| 1382269_at   | cyclin M2, Cnnm2                                                                                         | 5.3  | -2.1 |
| 1374013_at   | C1q and tumor necrosis factor related protein 5, C1qtnf5                                                 | 1.2  | -2.1 |
| 1374300_at   | ectonucleoside triphosphate diphosphohydrolase 4 (predicted), Entpd4_predicted                           | 1.3  | -2.1 |
| 1388011_a_at | transforming growth factor, beta 2, Tgfb2                                                                | -1.6 | -2.1 |
| 1388700_at   | Checkpoint suppressor 1 (predicted),                                                                     | -2.0 | -2.1 |

|              |                                                                                               |      |      |
|--------------|-----------------------------------------------------------------------------------------------|------|------|
|              | Ches1_predicted                                                                               |      |      |
| 1370381_at   | proline-rich nuclear receptor coactivator 1, Pnrc1                                            | 1.2  | -2.1 |
| 1372935_at   | transmembrane protein 119, Tmem119                                                            | 1.7  | -2.1 |
| 1395432_at   | Transcribed locus, ---                                                                        | -1.0 | -2.1 |
| 1385382_at   | Transcribed locus, ---                                                                        | -1.3 | -2.1 |
| 1370882_at   | major histocompatibility complex, class II, DM beta, Hla-dmb                                  | 4.5  | -2.1 |
| 1379441_at   | zinc finger protein 294, Zfp294                                                               | -1.3 | -2.1 |
| 1392382_at   | Transforming growth factor, beta 2, Tgfb2                                                     | -1.5 | -2.1 |
| 1375898_at   | similar to RNA binding protein gene with multiple splicing (predicted), RGD1561067_predicted  | -1.1 | -2.1 |
| 1369044_a_at | phosphodiesterase 4B, cAMP specific, Pde4b                                                    | 3.8  | -2.1 |
| 1375869_at   | Unc-51 like kinase 1 (C. elegans), Ulk1                                                       | -1.7 | -2.1 |
| 1367881_at   | signal-regulatory protein alpha, Sirpa                                                        | 3.8  | -2.1 |
| 1372907_at   | ATPase, H+ transporting, lysosomal V0 subunit E2, Atp6v0e2                                    | -2.0 | -2.1 |
| 1375270_at   | Transcribed locus, ---                                                                        | -1.2 | -2.1 |
| 1374743_at   | similar to channel-interacting PDZ domain protein isoform 1 (predicted), RGD1565362_predicted | -1.8 | -2.1 |
| 1370331_at   | interleukin 11 receptor, alpha chain 1, Il11ra1                                               | -1.8 | -2.1 |
| 1387654_at   | myosin IC, Myo1c                                                                              | -1.6 | -2.0 |
| 1372392_at   | Transcribed locus, ---                                                                        | -1.0 | -2.0 |
| 1377011_at   | similar to hypothetical protein CG003 (predicted), RGD1307034_predicted                       | -1.9 | -2.0 |
| 1374573_at   | dynein cytoplasmic 2 light intermediate chain 1, Dync2li1                                     | 1.2  | -2.0 |
| 1389129_at   | 2-4-dienoyl-Coenzyme A reductase 2, peroxisomal, RGD1308952                                   | 1.1  | -2.0 |
| 1370341_at   | enolase 2, gamma, neuronal, Eno2                                                              | 1.7  | -2.0 |
| 1369743_a_at | purinergic receptor P2X, ligand-gated ion channel 4, P2rx4                                    | 2.1  | -2.0 |
| 1372380_at   | similar to RNA binding protein gene with multiple splicing (predicted), RGD1561067_predicted  | 1.2  | -2.0 |
| 1392566_at   | Transcribed locus, ---                                                                        | -1.0 | -2.0 |
| 1367768_at   | latexin, Lxn                                                                                  | -1.5 | -2.0 |
| 1392704_at   | Transcribed locus, ---                                                                        | 1.3  | -2.0 |
| 1392935_at   | Transcribed locus, ---                                                                        | -1.7 | -2.0 |
| 1367577_at   | heat shock protein 1, Hspb1                                                                   | -1.4 | -2.0 |
| 1371510_at   | host cell factor C1 regulator 1 (XPO1-dependent), Hcfc1r1                                     | -1.8 | -2.0 |
| 1373988_at   | similar to neuroblastoma-amplified protein,                                                   | -1.2 | -2.0 |

|            | LOC690073                                                                      |      |      |
|------------|--------------------------------------------------------------------------------|------|------|
| 1368703_at | PDZ and LIM domain 5, Pdlim5                                                   | -1.9 | -2.0 |
| 1387099_at | natriuretic peptide receptor 2, Npr2                                           | -1.0 | -2.0 |
| 1376843_at | bone morphogenic protein receptor, type II<br>(serine/threonine kinase), Bmpr2 | 1.7  | -2.0 |
| 1377687_at | similar to cDNA sequence AK129302<br>(predicted), RGD1561708_predicted         | 1.4  | -2.0 |
| 1394778_at | Transcribed locus, ---                                                         | -1.4 | -2.0 |
| 1398370_at | adenosine deaminase, RNA-specific, B1,<br>Adarb1                               | -1.8 | -2.0 |
| 1371029_at | polycystic kidney disease 1 homolog, Pkd1                                      | -1.6 | -2.0 |

---

**Supplemental Table VI: IL-1 $\beta$  and PDGF-DD Commonly Downregulated Genes in SMCs**

| <b>Accession</b> | <b>Description</b>                                                                                            | <b>IL-1<math>\beta</math><br/>Fold<br/>Change</b> | <b>PDGF-DD<br/>Fold<br/>Change</b> |
|------------------|---------------------------------------------------------------------------------------------------------------|---------------------------------------------------|------------------------------------|
| 1371354_at       | troponin C, cardiac/slow skeletal, Tnnc1                                                                      | -9.0                                              | -14.9                              |
| 1376937_at       | similar to 4631422O05Rik protein (predicted), RGD1565927_predicted                                            | -11.0                                             | -2.3                               |
| 1393167_at       | Transcribed locus, ---                                                                                        | -9.6                                              | -8.6                               |
| 1391780_at       | family with sequence similarity 46, member B, Fam46b                                                          | -18.0                                             | -5.2                               |
| 1388792_at       | growth arrest and DNA-damage-inducible 45 gamma, Gadd45g                                                      | -10.6                                             | -5.2                               |
| 1388298_at       | myosin, light chain 9, regulatory, Myl9                                                                       | -8.0                                              | -8.1                               |
| 1379055_x_at     | ---                                                                                                           | -11.2                                             | -3.1                               |
| 1390471_at       | Transcribed locus, ---                                                                                        | -20.2                                             | -4.0                               |
| 1381975_at       | Transcribed locus, strongly similar to NP_001020144.1 hypothetical protein LOC293823 [Rattus norvegicus], --- | -9.4                                              | -2.1                               |
| 1367974_at       | annexin A3, Anxa3                                                                                             | -5.5                                              | -2.0                               |
| 1395794_at       | tropomyosin 1, alpha, Tpm1                                                                                    | -5.2                                              | -3.3                               |
| 1378233_at       | Transcribed locus, ---                                                                                        | -10.7                                             | -2.4                               |
| 1387886_at       | proline arginine-rich end leucine-rich repeat protein, Prelp                                                  | -6.9                                              | -4.6                               |
| 1367975_at       | annexin A3, Anxa3                                                                                             | -17.6                                             | -2.7                               |
| 1377618_at       | Kruppel-like factor 7 (ubiquitous) (predicted), Klf7_predicted                                                | -6.0                                              | -2.4                               |
| 1368146_at       | dual specificity phosphatase 1, Dusp1                                                                         | -5.4                                              | -4.0                               |
| 1379936_at       | Transcribed locus, ---                                                                                        | -9.0                                              | -5.2                               |
| 1395753_at       | elastin, Eln                                                                                                  | -4.4                                              | -3.4                               |
| 1368104_at       | tetraspanin 2, Tspan2                                                                                         | -14.1                                             | -2.1                               |
| 1367866_at       | fibulin 5, Fbln5                                                                                              | -5.1                                              | -2.2                               |
| 1380933_at       | Transcribed locus, ---                                                                                        | -4.2                                              | -2.9                               |
| 1384818_at       | myosin, light polypeptide kinase (predicted), Mylk_predicted                                                  | -4.1                                              | -15.4                              |
| 1371954_at       | tensin 1, Tns1                                                                                                | -2.3                                              | -2.7                               |
| 1383644_at       | Transcribed locus, ---                                                                                        | -3.1                                              | -6.2                               |
| 1389611_at       | very low density lipoprotein receptor, Vldlr                                                                  | -5.2                                              | -4.2                               |
| 1385008_at       | Transcribed locus, ---                                                                                        | -9.1                                              | -2.0                               |
| 1391753_at       | Transcribed locus, ---                                                                                        | -10.9                                             | -4.0                               |
| 1374643_at       | FAT tumor suppressor homolog 4 (Drosophila), Fat4                                                             | -3.1                                              | -2.8                               |
| 1368108_at       | ATPase, Ca <sup>++</sup> transporting, cardiac muscle, fast twitch 1, Atp2a1                                  | -10.0                                             | -3.3                               |

|              |                                                                      |       |       |
|--------------|----------------------------------------------------------------------|-------|-------|
| 1380940_at   | Transcribed locus, ---                                               | -3.5  | -4.7  |
| 1376398_at   | Transcribed locus, ---                                               | -8.2  | -2.1  |
| 1370057_at   | cysteine and glycine-rich protein 1, Csrp1                           | -3.4  | -2.3  |
| 1367650_at   | tubulointerstitial nephritis antigen-like 1, Tinagl1                 | -3.8  | -3.9  |
| 1376445_at   | interleukin 17B, Il17b                                               | -2.1  | -5.6  |
| 1388422_at   | LIM and senescent cell antigen like domains 2, Lims2                 | -7.7  | -12.6 |
| 1389376_at   | Transcribed locus, ---                                               | -7.7  | -3.1  |
| 1374542_at   | Transcribed locus, ---                                               | -3.5  | -7.9  |
| 1372316_at   | similar to AI115348 protein (predicted), RGD1311939_predicted        | -2.6  | -2.7  |
| 1387402_at   | myosin, heavy polypeptide 9, non-muscle, Myh9                        | -2.6  | -2.0  |
| 1367858_at   | matrix metalloproteinase 11, Mmp11                                   | -13.5 | -3.4  |
| 1372426_at   | ADAMTS-like 4, Adamtsl4                                              | -5.4  | -3.2  |
| 1370896_a_at | myosin, heavy polypeptide 11, smooth muscle, Myh11                   | -3.5  | -9.2  |
| 1387455_a_at | very low density lipoprotein receptor, Vldlr                         | -4.0  | -4.7  |
| 1382814_at   | odd Oz/ten-m homolog 3 (Drosophila) (predicted), Odz3_predicted      | -2.2  | -2.7  |
| 1396435_at   | Transcribed locus, ---                                               | -2.9  | -4.0  |
| 1369273_a_at | natriuretic peptide receptor 3, Npr3                                 | -8.1  | -7.4  |
| 1374237_at   | leiomodulin 1 (smooth muscle) (predicted), Lmod1_predicted           | -6.1  | -6.4  |
| 1373504_at   | GLI pathogenesis-related 1 (glioma), Glipr1                          | -4.0  | -2.6  |
| 1394838_at   | amine oxidase, copper containing 3, Aoc3                             | -2.6  | -10.3 |
| 1391448_at   | cysteine rich transmembrane BMP regulator 1 (chordin like), Crim1    | -5.7  | -3.6  |
| 1374969_at   | phosphoglucomutase 5 (predicted), Pgm5_predicted                     | -5.4  | -4.4  |
| 1370613_s_at | UDP glycosyltransferase 1 family, polypeptide A1, Ugt1a9             | -4.5  | -2.0  |
| 1378152_at   | Transcribed locus, ---                                               | -5.4  | -2.4  |
| 1398620_at   | Sterile alpha motif domain containing 4 (predicted), Samd4_predicted | -2.4  | -2.1  |
| 1390153_at   | Transcribed locus, ---                                               | -3.6  | -2.3  |
| 1371566_at   | F-box and leucine-rich repeat protein 22, Fbxl22                     | -5.0  | -40.1 |
| 1374729_at   | Transcribed locus, ---                                               | -3.0  | -2.0  |
| 1368080_at   | response gene to complement 32, Rgc32                                | -8.9  | -5.9  |
| 1387018_at   | Arg/Abl-interacting protein ArgBP2, Argbp2                           | -4.2  | -3.9  |
| 1398380_at   | von Willebrand factor A domain containing 1, Vwa1                    | -4.3  | -9.4  |
| 1382229_at   | Transcribed locus, ---                                               | -2.4  | -5.0  |
| 1373152_at   | protease, serine, 23, Prss23                                         | -7.0  | -4.5  |



|              |                                                                                                               |       |       |
|--------------|---------------------------------------------------------------------------------------------------------------|-------|-------|
| 1386869_at   | actin, gamma 2, smooth muscle, enteric, Actg2                                                                 | -2.3  | -17.5 |
| 1391390_at   | tensin 1, Tns1                                                                                                | -5.0  | -3.3  |
| 1387401_at   | calsequestrin 2, Casq2                                                                                        | -20.0 | -10.0 |
| 1371361_at   | tensin 1, Tns1                                                                                                | -5.1  | -2.5  |
| 1394750_at   | four and a half LIM domains 1, Fhl1                                                                           | -2.2  | -4.1  |
| 1379999_at   | Microtubule associated monooxygenase, calponin and LIM domain containing 3, Mical3                            | -2.0  | -2.3  |
| 1368988_at   | calsequestrin 2, Casq2                                                                                        | -5.2  | -5.9  |
| 1374417_at   | similar to nuclear receptor binding protein, LOC680451                                                        | -4.0  | -2.8  |
| 1377309_at   | Transcribed locus, ---                                                                                        | -2.5  | -3.5  |
| 1395734_at   | palmdelphin, Palmd                                                                                            | -5.9  | -3.3  |
| 1374758_at   | Transcribed locus, ---                                                                                        | -3.0  | -4.0  |
| 1367813_at   | protein phosphatase 1, regulatory (inhibitor) subunit 14A, Ppp1r14a                                           | -6.4  | -5.4  |
| 1379647_at   | Transcribed locus, ---                                                                                        | -4.5  | -2.4  |
| 1384056_at   | Fibroblast growth factor receptor 3, Fgfr3                                                                    | -2.3  | -4.5  |
| 1369957_at   | regulator of G-protein signaling 5, Rgs5                                                                      | -6.6  | -5.4  |
| 1380088_at   | Transcribed locus, ---                                                                                        | -18.7 | -3.6  |
| 1370854_at   | nexilin, Nexn                                                                                                 | -2.9  | -5.0  |
| 1398390_at   | chemokine (C-X-C motif) ligand 13, Cxcl13                                                                     | -5.5  | -4.3  |
| 1372728_at   | Sortilin 1, Sort1                                                                                             | -3.9  | -2.7  |
| 1373829_at   | fibroblast growth factor receptor 2, Fgfr2                                                                    | -4.5  | -3.1  |
| 1391841_at   | Transcribed locus, ---                                                                                        | -5.9  | -3.2  |
| 1396053_at   | neural precursor cell expressed, developmentally down-regulated gene 9, Nedd9                                 | -4.8  | -2.7  |
| 1367648_at   | insulin-like growth factor binding protein 2, Igfbp2                                                          | -3.2  | -2.3  |
| 1390049_at   | four and a half LIM domains 1, Fhl1                                                                           | -5.0  | -3.3  |
| 1370697_a_at | nexilin, Nexn                                                                                                 | -12.6 | -3.7  |
| 1372615_at   | amine oxidase, copper containing 3, Aoc3                                                                      | -4.9  | -7.9  |
| 1379126_at   | Transcribed locus, strongly similar to NP_001020144.1 hypothetical protein LOC293823 [Rattus norvegicus], --- | -2.5  | -2.1  |
| 1383708_at   | integrin, beta-like 1, Itgbl1                                                                                 | -2.4  | -2.4  |
| 1368003_at   | aldehyde dehydrogenase family 1, subfamily A2, Aldh1a2                                                        | -2.3  | -4.4  |
| 1376878_at   | similar to RIKEN cDNA 2310022B05 (predicted), RGD1559896_predicted                                            | -2.8  | -4.6  |
| 1381923_at   | similar to LOC387763 protein (predicted), RGD1564664_predicted                                                | -4.3  | -4.4  |
| 1395413_at   | ---                                                                                                           | -5.3  | -2.3  |
| 1369098_at   | very low density lipoprotein receptor, Vldlr                                                                  | -3.0  | -3.5  |

|              |                                                                                                                             |       |       |
|--------------|-----------------------------------------------------------------------------------------------------------------------------|-------|-------|
| 1371472_at   | Transcribed locus, ---                                                                                                      | -2.8  | -4.6  |
| 1371004_at   | sortilin 1, Sort1                                                                                                           | -21.1 | -2.4  |
| 1390682_at   | formin binding protein 1, Fnbp1                                                                                             | -7.0  | -2.8  |
| 1385704_at   | tensin 1, Tns1                                                                                                              | -4.9  | -4.6  |
| 1383498_at   | Transcribed locus, ---                                                                                                      | -3.4  | -2.3  |
| 1369928_at   | actin, alpha 1, skeletal muscle, Acta1                                                                                      | -3.8  | -28.3 |
| 1369793_a_at | melanoma cell adhesion molecule, Mcam                                                                                       | -2.4  | -3.3  |
| 1396885_at   | smoothelin, Smtn                                                                                                            | -2.5  | -3.8  |
| 1374290_at   | Transcribed locus, ---                                                                                                      | -4.7  | -7.5  |
| 1368506_at   | regulator of G-protein signaling 4, Rgs4                                                                                    | -2.7  | -52.0 |
| 1373108_at   | protein phosphatase 1, regulatory (inhibitor) subunit 3C, Ppp1r3c                                                           | -4.1  | -3.8  |
| 1394824_at   | integrin, alpha 11 (predicted), Itga11_predicted                                                                            | -3.3  | -15.7 |
| 1379380_at   | sprouty homolog 1 (Drosophila) (predicted), Spry1_predicted                                                                 | -6.4  | -7.9  |
| 1391067_at   | ---                                                                                                                         | -8.5  | -2.0  |
| 1394077_at   | Rho family GTPase 3, Rnd3                                                                                                   | -3.6  | -2.0  |
| 1374263_at   | Transcribed locus, ---                                                                                                      | -2.6  | -10.8 |
| 1379516_at   | similar to RIKEN cDNA 2310022B05 (predicted), RGD1559896_predicted                                                          | -3.9  | -4.1  |
| 1392773_at   | proprotein convertase subtilisin/kexin type 5, Pcsk5                                                                        | -4.0  | -3.0  |
| 1383398_at   | similar to integrin alpha 8 (predicted), RGD1564327_predicted                                                               | -4.9  | -7.2  |
| 1382037_at   | cysteine rich transmembrane BMP regulator 1 (chordin like), Crim1                                                           | -2.0  | -2.7  |
| 1393615_at   | similar to DEP domain containing 6 (predicted), RGD1561030_predicted                                                        | -3.9  | -3.9  |
| 1376481_at   | a disintegrin-like and metalloprotease (reprolysin type) with thrombospondin type 1 motif, 9 (predicted), Adamts9_predicted | -2.1  | -7.9  |
| 1373485_at   | Similar to ring finger protein 122 homolog (predicted), RGD1561238_predicted                                                | -5.1  | -3.1  |
| 1371700_at   | microfibrillar-associated protein 4, Mfap4                                                                                  | -3.1  | -3.3  |
| 1384211_at   | procollagen, type XI, alpha 1, Col11a1                                                                                      | -4.2  | -2.1  |
| 1383939_at   | Transcribed locus, ---                                                                                                      | -3.8  | -2.0  |
| 1376572_a_at | supervillin (predicted), Svil_predicted                                                                                     | -2.3  | -2.7  |
| 1368806_at   | selenoprotein P, plasma, 1, Sepp1                                                                                           | -5.0  | -2.8  |
| 1380017_at   | Transcribed locus, ---                                                                                                      | -2.4  | -2.4  |
| 1372684_at   | smoothelin, Smtn                                                                                                            | -2.3  | -2.7  |
| 1374933_at   | melanoma cell adhesion molecule, Mcam                                                                                       | -3.2  | -3.8  |
| 1368824_at   | caldesmon 1, Cald1                                                                                                          | -2.8  | -2.3  |
| 1383770_at   | Transcribed locus, ---                                                                                                      | -3.1  | -2.3  |
| 1376118_at   | OTU domain, ubiquitin aldehyde binding 2                                                                                    | -3.0  | -2.5  |

|              |                                                                                |       |       |
|--------------|--------------------------------------------------------------------------------|-------|-------|
|              | (predicted), Otub2_predicted                                                   |       |       |
| 1370678_s_at | monoamine oxidase A, Maa                                                       | -2.0  | -2.0  |
| 1382190_at   | MAS-related GPR, member F, Mrgprf                                              | -4.0  | -4.5  |
| 1376911_at   | Transcribed locus, ---                                                         | -8.6  | -3.5  |
| 1392653_at   | Transcribed locus, ---                                                         | -3.7  | -2.1  |
| 1374683_at   | sarcoglycan, gamma (dystrophin-associated glycoprotein), Sgcg                  | -2.5  | -4.9  |
| 1392924_at   | Transcribed locus, ---                                                         | -2.0  | -4.7  |
| 1372583_at   | Transcribed locus, ---                                                         | -7.1  | -3.6  |
| 1376646_at   | popeye domain containing 2, Popdc2                                             | -2.1  | -3.7  |
| 1392361_at   | Transcribed locus, ---                                                         | -2.1  | -2.1  |
| 1374768_at   | coiled-coil domain containing 65, Ccdc65                                       | -3.6  | -3.7  |
| 1378766_at   | Transcribed locus, ---                                                         | -4.6  | -2.0  |
| 1369373_at   | fibroblast growth factor receptor 3, Fgfr3                                     | -2.1  | -3.9  |
| 1377663_at   | Rho family GTPase 3, Rnd3                                                      | -3.3  | -2.3  |
| 1368505_at   | regulator of G-protein signaling 4, Rgs4                                       | -2.2  | -97.5 |
| 1396249_at   | Transcribed locus, ---                                                         | -2.2  | -4.0  |
| 1389913_at   | leucine rich repeat (in FLII) interacting protein 1, Lrrfip1                   | -3.5  | -2.1  |
| 1390412_at   | solute carrier family 39 (iron-regulated transporter), member 1, Slc40a1       | -4.1  | -2.5  |
| 1368725_at   | jagged 1, Jag1                                                                 | -3.3  | -2.6  |
| 1380964_at   | dystrobrevin alpha (predicted), Dtna_predicted                                 | -3.5  | -3.6  |
| 1382864_at   | palmdelphin, Palmd                                                             | -2.3  | -3.5  |
| 1371412_a_at | Neuronal regeneration related protein, Nrep                                    | -2.2  | -3.1  |
| 1397610_at   | Transcribed locus, ---                                                         | -2.1  | -7.2  |
| 1376725_at   | low density lipoprotein receptor-related protein 6 (predicted), Lrp6_predicted | -4.0  | -2.5  |
| 1377669_at   | RAB27A, member RAS oncogene family, Rab27a                                     | -3.9  | -2.6  |
| 1395236_at   | protein phosphatase 1, regulatory (inhibitor) subunit 3C, Ppp1r3c              | -15.4 | -2.5  |
| 1387759_s_at | UDP glycosyltransferase 1 family, polypeptide A1, Ugt1a9                       | -2.9  | -2.2  |
| 1376924_a_at | palmdelphin, Palmd                                                             | -3.5  | -5.3  |
| 1376066_at   | Transcribed locus, ---                                                         | -2.4  | -2.2  |
| 1369182_at   | coagulation factor III, F3                                                     | -3.0  | -3.6  |
| 1373286_at   | filamin binding LIM protein 1, Fblim1                                          | -3.5  | -3.1  |
| 1381088_at   | podocan (predicted), Podn_predicted                                            | -2.5  | -5.2  |
| 1371541_at   | myosin, light polypeptide kinase (predicted), Mylk_predicted                   | -2.6  | -12.3 |
| 1370288_a_at | tropomyosin 1, alpha, Tpm1                                                     | -2.7  | -2.0  |
| 1379719_at   | Transcribed locus, ---                                                         | -5.5  | -2.7  |
| 1388111_at   | elastin, Eln                                                                   | -4.5  | -5.4  |

|              |                                                                                                                       |       |      |
|--------------|-----------------------------------------------------------------------------------------------------------------------|-------|------|
| 1369518_at   | phosphatidylinositol 3 kinase, regulatory subunit, polypeptide 3 (p55), Pik3r3                                        | -4.2  | -2.3 |
| 1389739_at   | neuralized-like 2 (Drosophila) (predicted), Neurl2_predicted                                                          | -2.5  | -4.6 |
| 1373915_at   | dystrophia myotonica-protein kinase (predicted), Dmpk_predicted                                                       | -2.7  | -4.1 |
| 1369085_s_at | small nuclear ribonucleoprotein N, Snurf                                                                              | -2.8  | -2.1 |
| 1370158_at   | myosin, heavy polypeptide 10, non-muscle, Myh10                                                                       | -3.2  | -2.8 |
| 1376101_at   | Transcribed locus, ---                                                                                                | -2.1  | -2.3 |
| 1379747_at   | Protease, serine, 35, Prss35                                                                                          | -5.0  | -2.0 |
| 1383914_at   | MRV integration site 1 homolog (mouse) (predicted), Mrvi1_predicted                                                   | -2.8  | -6.1 |
| 1374650_at   | neural precursor cell expressed, developmentally down-regulated gene 9, Nedd9                                         | -2.6  | -2.7 |
| 1370375_at   | glutaminase 2 (liver, mitochondrial), Glis2                                                                           | -2.4  | -5.8 |
| 1392915_at   | procollagen, type XI, alpha 1, Col11a1                                                                                | -2.1  | -2.6 |
| 1369993_at   | calcium/calmodulin-dependent protein kinase II gamma, Camk2g                                                          | -2.9  | -2.1 |
| 1390159_at   | RAS, guanyl releasing protein 3 (predicted), Rasgrp3_predicted                                                        | -2.7  | -3.3 |
| 1393806_at   | MANSC domain containing 1, Mansc1                                                                                     | -3.7  | -2.7 |
| 1398304_at   | frizzled homolog 2 (Drosophila), Fzd2                                                                                 | -2.2  | -2.0 |
| 1381363_at   | Transcribed locus, moderately similar to XP_001236194.1 PREDICTED: hypothetical protein, partial [Gallus gallus], --- | -2.5  | -2.0 |
| 1387873_at   | WAP four-disulfide core domain 1, Wfdc1                                                                               | -11.3 | -9.7 |
| 1375349_at   | similar to sorbin and SH3 domain containing 1 isoform 3, LOC678826                                                    | -3.2  | -6.1 |
| 1388935_at   | Protein phosphatase 1, regulatory (inhibitor) subunit 12B (predicted), Ppp1r12b_predicted                             | -2.4  | -4.0 |
| 1368223_at   | a disintegrin-like and metallopeptidase (reprolysin type) with thrombospondin type 1 motif, 1, Adamts1                | -4.5  | -2.1 |
| 1379625_at   | Similar to RIKEN cDNA 3110050N22 (predicted), RGD1311970_predicted                                                    | -2.0  | -2.1 |
| 1388866_at   | sarcospan, Sspn                                                                                                       | -4.9  | -2.0 |
| 1389918_at   | Transcribed locus, strongly similar to XP_001053156.1 PREDICTED: similar to palladin [Rattus norvegicus], ---         | -3.6  | -4.4 |
| 1372856_at   | Transcribed locus, ---                                                                                                | -2.4  | -2.4 |
| 1384286_at   | Transcribed locus, ---                                                                                                | -2.7  | -2.1 |
| 1386039_x_at | ---                                                                                                                   | -5.1  | -2.8 |
| 1367665_at   | ankyrin repeat domain 1 (cardiac muscle),                                                                             | -2.8  | -4.1 |

|              |                                                         |      |      |
|--------------|---------------------------------------------------------|------|------|
|              | Ankrd1                                                  |      |      |
| 1367738_at   | UNC-119 homolog (C. elegans), Unc119                    | -2.5 | -2.9 |
| 1372647_at   | ---                                                     | -2.5 | -7.8 |
| 1389706_at   | Transcribed locus, ---                                  | -3.7 | -2.7 |
| 1372722_at   | Transcribed locus, ---                                  | -2.2 | -2.6 |
| 1377946_at   | Transcribed locus, ---                                  | -2.4 | -2.0 |
| 1390127_at   | DIX domain containing 1, Dixdc1                         | -4.6 | -2.5 |
| 1380470_x_at | ---                                                     | -3.1 | -2.2 |
| 1396076_at   | ---                                                     | -3.3 | -2.6 |
| 1367785_at   | calponin 1, Cnn1                                        | -3.3 | -7.5 |
| 1371969_at   | Transcribed locus, ---                                  | -8.4 | -2.2 |
| 1379732_at   | syntaxin 11, Stx11                                      | -3.6 | -3.1 |
| 1393467_at   | proprotein convertase subtilisin/kexin type 5,<br>Pcsk5 | -2.4 | -7.7 |
| 1380311_at   | Transcribed locus, ---                                  | -3.1 | -2.2 |
| 1392948_at   | Transcribed locus, ---                                  | -2.0 | -2.2 |
| 1370857_at   | smooth muscle alpha-actin, Acta2                        | -2.2 | -7.0 |

---

**Supplemental Table VII. Gene ontology clustering of distinctly IL-1 $\beta$ -induced genes in SMCs**

| <b>Gene Ontology Cluster</b>                 | <b>Enrichment Score</b> | <b>Annotated Genes</b>                                                                                                                                                                                                                                                                                                                                                                                                                                                                                                                                                                                          |
|----------------------------------------------|-------------------------|-----------------------------------------------------------------------------------------------------------------------------------------------------------------------------------------------------------------------------------------------------------------------------------------------------------------------------------------------------------------------------------------------------------------------------------------------------------------------------------------------------------------------------------------------------------------------------------------------------------------|
| Inflammatory Response                        | 11.3                    | <i>Arg1, Ass1, Bcl3, Bmp6, Bmp6, Bmp6, C1S, C3, C4Bpa, Casp3, Ccl2, Ccl20, Ccl5, Ccl7, Cd74, Ceacam19, Cfb, Ciita, Clu, Cx3cl1, Cxcl1, Cxcl16, Cxcl2, Cxcl3, Cxcl3, Cxcl3, Cxcl3, Cxcl6, Cyba, Elf3, Elk3, Elk3, Fgr, Gch1, Hif1A, Hp, Il1R1, Il1R1, Il4Ra, Il6, Jak2, Jak2, Lbp, Loc290412, Loc290503, Loc497963, Loc499261, Loc681135, Loc686887, Lyc2, Lyn, Lyz2, Map2k3, Masp1, Mmp2, Mphosph8, Nfkbiz, Nos2, Orm1, Parp4, Pdgfra, Pkm2, Pld1, Ptges, Ptges, Pxx, Pxx, Pxx, Rbpj, Rbpsuh, Rgd1561179, Rgd1561715, Rt1-Ba, Rt1-Da, Selp, Serpine1, Serping1, Sod2, Sod2, Tgfb1, Timp1, Tlr2, Vcam1, Vcan</i> |
| Response to lipopolysaccharide               | 6.8                     | <i>Ass1, Bcl3, Casp3, Ccl2, Ccl5, Ceacam19, Cfb, Fgr, Gch1, Hp, Il6, Irak3, Lbp, Loc360228, Loc497963, Loc686887, Lyc2, Lyz2, Mgst1, Mgst2, Nfkb2, Nfkbia, Nos2, Pld1, Ptges, Ptges, Rbpj, Rbpsuh, Selp, Socs3, Tlr2, Trib1</i>                                                                                                                                                                                                                                                                                                                                                                                 |
| Adaptive immune response                     | 4.9                     | <i>Bcl3, Bcl6, C1S, C3, C4Bpa, Cd74, Ceacam19, Cfb, Hpx, Icam1, Il6, Lbp, Loc686887, Lyn, Masp1, Nfkb2, Nfkbia, Pvr12, Rgd1561715, Rt1-A1, Rt1-A2, Rt1-A3, Rt1-Ba, Rt1-Ce14, Rt1-Ce16, Rt1-CI, Rt1-Da, Rt1-Dma, Serping1, Sh2b2, Stat5A, Swap70, Tlr2, Tnfsf13, Traf3lp2</i>                                                                                                                                                                                                                                                                                                                                    |
| Antigen processing and presentation          | 4.5                     | <i>Cd74, Hsph1, Icam1, Loc686172, Loc688090, Psmb9, Psme2, Rt1-A1, Rt1-A2, Rt1-A3, Rt1-Ba, Rt1-Bb, Rt1-Ce1, Rt1-Ce12, Rt1-Ce14, Rt1-Ce16, Rt1-CI, Rt1-Da, Rt1-Db1, Rt1-Db1, Rt1-Dma, Rt1-Dmb</i>                                                                                                                                                                                                                                                                                                                                                                                                                |
| Positive regulation of inflammatory response | 3.8                     | <i>Adora2b, Bcl6, C1S, C3, C4Bpa, Calcrl, Ccl5, Cfb, Cx3Cl1, Fabp4, Hpx, Il6, Jak2, Jak2, Lbp, Lyn, Masp1, Nfkbia, Pvr12, Rgd1561715, Rt1-A1, Rt1-A2, Rt1-A3, Rt1-Ba, Rt1-Ce14, Rt1-Ce16, Rt1-CI, Rt1-Da, Rt1-Dma, Sbn02, Selp, Serping1, Sh2b2, Slit2, Slit2, Stat5a, Tgfb1, Tlr2, Tnfsf13</i>                                                                                                                                                                                                                                                                                                                 |
| Response to hormone                          | 3.5                     | <i>Acsl1, Acsl1, Asns, Ass1, Bckdhhb, Bmp6,</i>                                                                                                                                                                                                                                                                                                                                                                                                                                                                                                                                                                 |

|                                    |     |                                                                                                                                                                                                                                                                                                                                                                                                                                                                                                                                                                            |
|------------------------------------|-----|----------------------------------------------------------------------------------------------------------------------------------------------------------------------------------------------------------------------------------------------------------------------------------------------------------------------------------------------------------------------------------------------------------------------------------------------------------------------------------------------------------------------------------------------------------------------------|
| stimulus                           |     | <i>Bmp6, Bmp6, Btg2, C1s, Casp3, Ccl2, Ccl5, Cd83, Cdkn1a, Cdkn1A, Cdkn2a, Cdkn2b, Cdo1, Cfb, Ciita, Creb3L1, Ctsc, Cxcl16, Cyp1B1, Fabp4, Fosl2, Gch1, Glul, Glul, Glul, Gng2, Gng8, Hif1a, Hp, Il1r1, Il1r1, Il6, Il6st, Il6st, Il6st, Il6st, Irak3, Jak2, Jak2, Junb, Lbp, Loc290412, Loc290503, Loc360228, Loc499261, Loc681135, Lyn, Mgp, Mgp, Mgst1, Mgst2, Mmp13, Mmp2, Mmp3, Nfkb2, Nfkb1a, P2rx4, Pdgfra, Pik3R1, Pkm2, Plat, Pld1, Ptges, Ptges, Ptpn, Ramp2, Rerg, Rgd1561179, Rgd1561715, Selp, Sh2b2, Socs3, Stat5a, Tgfb1, Timp1, Tlr2, Tnfrsf11b, Trib1</i> |
| Regulation of leukocyte activation | 3.3 | <i>Adora2b, Bcl6, Bmp6, Bmp6, Bmp6, C3, Casp3, Ccl5, Cd74, Cd83, Cdkn1a, Cdkn1a, Cdkn2b, Clu, Csf1, Csf1, Csf1, Csf2, Hif1a, Hlx, Hpx, Il13ra1, Il13ra1, Il4ra, Il6, Il6st, Il6st, Il6st, Irak3, Jak2, Jak2, Junb, Lbp, Lyn, Pik3r1, Pvr12, Rt1-A1, Rt1-A2, Rt1-A3, Rt1-Ba, Rt1-Ce14, Rt1-Ce16, Rt1-CI, Rt1-Dma, Runx1, Serping1, Socs3, Socs5, Socs5, Stat5A, Tgfb1, Tgif1, Tnfsf13, Vcam1, Xrcc5</i>                                                                                                                                                                     |
| Leukocyte homeostasis              | 3.2 | <i>Adora2b, Bcl6, C1s, C3, C4Bpa, Casp3, Cd74, Cd83, Cdkn1a, Cdkn1a, Cfb, Csf1, Csf1, Csf1, Hlx, Hpx, Icam1, Il13ra1, Il13ra1, Il4ra, Il6, Il6st, Il6st, Il6st, Il6st, Irak3, Jak2, Jak2, Lbp, Lyn, Masp1, Nfkb1a, Pvr12, Rgd1561715, Rt1-A1, Rt1-A2, Rt1-A3, Rt1-Ba, Rt1-Ce14, Rt1-Ce16, Rt1-CI, Rt1-Da, Rt1-Dma, Selp, Serping1, Sh2b2, Socs5, Socs5, Stat5a, Tgfb1, Tlr2, Tnfsf13, Vcam1</i>                                                                                                                                                                            |
| Regulation of cytokine production  | 3.2 | <i>Adora2b, Atp1a1, Atp1a1, Bcl3, Bcl6, Bmp6, Bmp6, Bmp6, Ccl2, Ccl5, Cd83, Ceacam19, Cebpb, Csf1, Csf1, Csf1, Cx3cl1, Foxs1, Fst, Fst, Glul, Glul, Glul, Hif1A, Htr2a, Il6, Irak3, Jak2, Jak2, Lbp, Loc686887, Map2k3, Nox1, Stat5A, Tgfb1, Tlr2</i>                                                                                                                                                                                                                                                                                                                      |
| Defense response to bacterium      | 3.0 | <i>Bcl3, Ceacam19, Fgr, Il6, Lbp, Loc497963, Loc686887, Lyc2, Lyz2, Nos2, Pld1, Rbpj, Rbpsuh, Tlr2</i>                                                                                                                                                                                                                                                                                                                                                                                                                                                                     |

---

**Supplemental Table VIII: Gene ontology clustering of distinctly PDGF-DD-induced genes in SMCs**

| <b>Gene Ontology</b>                  | <b>Enrichment Score</b> | <b>Annotated Genes</b>                                                                                                                                                                                                                                                                                                                                                                                                                                                                                                                                                                                                                                                                                                                                               |
|---------------------------------------|-------------------------|----------------------------------------------------------------------------------------------------------------------------------------------------------------------------------------------------------------------------------------------------------------------------------------------------------------------------------------------------------------------------------------------------------------------------------------------------------------------------------------------------------------------------------------------------------------------------------------------------------------------------------------------------------------------------------------------------------------------------------------------------------------------|
| Cell cycle                            | 16.7                    | <i>Asf1b, Aspm, Aurka, Birc5, Blm, Bub1B, Ccdc99, Ccna2, Ccnb1, Ccnb1, Ccne1, Ccnf, Ccnf-Ps1, Cdc25a, Cdc25b, Cdc45l, Cdc45l, Cdc45l, Cdca3, Cdca5, Cdca8, Chek1, Dnmt1, Dscc1, E2F1, Ercc1, Esp1, Fbxo5, Hat1, Hells, Hjurp, Hjurp, Inhba, Kif11, Kif18A, Kifc1, Lig1, Lig1, Loc290415, Loc300303, Loc317415, Loc364091, Loc684771, Loc686151, Loc689892, Loc692021, Mad2L1, Mad2L1, Mapk6, Mcm2, Mcm6, Mki67, Nasp, Ncapd2, Ncaph, Npm1, Nusap1, Pdpn, Phgdh, Pola1, Pole, Psmc6, Psm14, Pttg1, Racgap1, Racgap1, Rad51, Rad51c, Ran, Rasa1, Rasa1, Rasa1, Rassf1, Rassf1, Rgd1310778, Rgd1559647, Rgd1560892, Rgd1562067, Rgd1564855, Rgd1565692, Rrs1, Ruvbl1, Ruvbl2, Sass6, Ska1, Ska3, Smc2, Spc25, Suv39H1, Tacc3, Terf1, Timeless, Trip13, Ube2c, Uhrf1</i> |
| DNA repair                            | 12.5                    | <i>Blm, Ccne1, Ccne2, Cdc25a, Cdc45l, Cdc45l, Cdc45l, Chek1, Dnmt1, Dyrk4, Ercc1, Esco2, Esco2-Ps1, Exo1, Fen1, Gins1, H2afx, Hells, Hmox1, Insig1, Jun, Jun, Jun, Lig1, Lig1, Loc317415, Loc363932, Loc364091, Loc364182, Loc367976, Loc683536, Loc688617, Loc688922, Loc689892, Loc691979, Mcm10, Mcm10, Mcm2, Mcm3, Mcm4, Mcm5, Mcm6, Mcm7, Mcm8, Nasp, Nedd4, Orc1L, Orc6l, Orc6l, Pola1, Pola2, Pold2, Pold3, Pole, Pole2, Prim1, Prim2, Pttg1, Rad18, Rad51, Rad51Ap1, Rad51c, Rfc2, Rfc3, Rfc4, Rfc5, Rfc5, Rgd1559671, Rgd1560892, Rgd1563943, Rgd1564855, Rpa3, Rrm1, Rrm1-Ps1, Rrm2, Ruvbl1, Ruvbl2, Terf1, Timeless, Tk1, Tk1, Trip13, Ube2N, Uhrf1, Ung, Usp1</i>                                                                                        |
| Chromosome localization               | 5.5                     | <i>Aspm, Birc5, Ccdc99, Cdca5, Dscc1, Esp1, Kif18A, Loc300303, Loc684771, Loc686151, Mad2L1, Mad2L1, Ncapd2, Ncaph, Npm1, Nusap1, Rrs1, Smc2, Tacc3</i>                                                                                                                                                                                                                                                                                                                                                                                                                                                                                                                                                                                                              |
| Microtubule cytoskeleton organization | 5.0                     | <i>Birc5, Ccdc99, Cenpe, Esp1, Ezr, Fbxo5, Kif11, Kif14, Kif15, Kif18A, Kif18B, Kif20A, Kif20B, Kif23, Kifc1, Loc300303, Npm1, Nusap1, Pfn2, Racgap1, Racgap1, Ran, Rasa1, Rasa1, Rasa1, Sass6, Spc25, Tacc3, Tuba4A</i>                                                                                                                                                                                                                                                                                                                                                                                                                                                                                                                                             |
| Regulation of cell cycle              | 4.6                     | <i>Birc5, Blm, Ccnb1, Ccnb1, Ccne1, Ccne2, Cdt1, Cenpe, Chek1, E2F1, Fbxo5, Gmnn, H2afx, Inhba, Jun, Jun, Jun, Loc300303, Mad2L1, Mad2L1, Npm1,</i>                                                                                                                                                                                                                                                                                                                                                                                                                                                                                                                                                                                                                  |



DNA duplex  
unwinding 4.1

*Nucks1, Nusap1, Plk4, Tacc3, Timeless, Ube2c, Zwilch  
Loc31741, Mcm2, Mcm4, Mcm6, Mcm7, Rad51,  
Rgd1563943*

---

**Supplemental Table IX: Gene ontology clustering of distinctly PDGF-DD-repressed genes in SMCs**

| <b>Gene Ontology Cluster</b>        | <b>Enrichment Score</b> | <b>Annotated Genes</b>                                                           |
|-------------------------------------|-------------------------|----------------------------------------------------------------------------------|
| Antigen processing and presentation | 3.3                     | <i>C1s, C3, C4b, Cd74, RGD1561715, Rt1-ba, Rt1-da, Rt1-db1, Rt1-db1, Rt1-dmb</i> |
